# Supplementary material for: Accelerating Discovery of Functional Mutant Alleles in Cancer
Source: Oxford University Press journal article supplement (doi:10.1158/2159-8290.cd-17-0321), 2017-12-15
Supplement: 21598290cd170321-sup-180993_2_supp_4422384_p08s6f.xlsx [file 21598290cd170321-sup-180993_2_supp_4422384_p08s6f.xlsx]

## Sheet: Table S1
Supplementary Table 1: Organ types and samples analyzed
	Organ Type	Number of prospectively sequenced samples (MSK)	Number of retrospectively sequenced samples
	Adrenal gland	30	270
	Ampulla of vater	25	0
	Biliary tract	240	130
	Bladder	406	548
	Blood	26	872
	Bone	126	211
	Bowel	1184	594
	Breast	1241	1299
	Cervix	47	194
	CNS/Brain	658	1633
	Esophagus/Stomach	318	1087
	Eye	47	80
	Head and neck	294	718
	Kidney	324	988
	Liver	104	539
	Lung	1644	1081
	Lymph	164	204
	Ovary/Fallopian tube	234	467
	Pancreas	484	578
	Penis	7	0
	Peripheral nervous system	15	15
	Peritoneum	18	0
	Pleura	86	0
	Prostate	622	787
	Skin	359	634
	Soft tissue	572	298
	Testis	92	149
	Thymus	18	151
	Thyroid	224	402
	Cancer of Unknown Primary	410	0
	Uterus	299	327
	Vulva/Vagina	18	0

## Sheet: Table S2
Supplementary Table 2: Genes analyzed here
	Hugo Symbol	Number of samples sequenced
	ABL1	24592
	AKT1	24592
	AKT2	24592
	AKT3	24592
	ALK	24592
	ALOX12B	24592
	APC	24592
	AR	24592
	ARAF	24592
	ARID1A	24592
	ARID1B	24592
	ARID2	24592
	ARID5B	24592
	ASXL1	24592
	ASXL2	24592
	ATM	24592
	ATR	24592
	ATRX	24592
	AURKA	24592
	AURKB	24592
	AXIN1	24592
	AXIN2	24592
	AXL	24592
	B2M	24592
	BAP1	24592
	BARD1	24592
	BBC3	24592
	BCL2	24592
	BCL2L1	24592
	BCL2L11	24592
	BCL6	24592
	BCOR	24592
	BLM	24592
	BMPR1A	24592
	BRAF	24592
	BRCA1	24592
	BRCA2	24592
	BRD4	24592
	BRIP1	24592
	BTK	24592
	CARD11	24592
	CASP8	24592
	CBFB	24592
	CBL	24592
	CCND1	24592
	CCND2	24592
	CCND3	24592
	CCNE1	24592
	CD274	24592
	CD276	24592
	CD79B	24592
	CDC73	24592
	CDH1	24592
	CDK12	24592
	CDK4	24592
	CDK6	24592
	CDK8	24592
	CDKN1A	24592
	CDKN1B	24592
	CDKN2A	24592
	CDKN2B	24592
	CDKN2C	24592
	CHEK1	24592
	CHEK2	24592
	CIC	24592
	CREBBP	24592
	CRKL	24592
	CRLF2	24592
	CSF1R	24592
	CTCF	24592
	CTLA4	24592
	CTNNB1	24592
	CUL3	24592
	DAXX	24592
	DCUN1D1	24592
	DDR2	24592
	DICER1	24592
	DIS3	24592
	DNMT1	24592
	DNMT3A	24592
	DNMT3B	24592
	DOT1L	24592
	E2F3	24592
	EED	24592
	EGFL7	24592
	EGFR	24592
	EIF1AX	24592
	EP300	24592
	EPCAM	24592
	EPHA3	24592
	EPHA5	24592
	EPHB1	24592
	ERBB2	24592
	ERBB3	24592
	ERBB4	24592
	ERCC2	24592
	ERCC3	24592
	ERCC4	24592
	ERCC5	24592
	ERG	24592
	ESR1	24592
	ETV1	24592
	ETV6	24592
	EZH2	24592
	FAM123B	24592
	FAM175A	24592
	FAM46C	22029
	FANCA	24592
	FANCC	24592
	FAT1	24592
	FBXW7	24592
	FGF19	24592
	FGF3	24592
	FGF4	24592
	FGFR1	24592
	FGFR2	24592
	FGFR3	24592
	FGFR4	24592
	FH	24592
	FLCN	24592
	FLT1	24592
	FLT3	24592
	FLT4	24592
	FOXA1	24592
	FOXL2	24592
	FOXP1	24592
	FUBP1	24592
	GATA1	24592
	GATA2	24592
	GATA3	24592
	GNA11	24592
	GNAQ	24592
	GNAS	24592
	GREM1	24592
	GRIN2A	24592
	GSK3B	24592
	H3F3C	24592
	HGF	24592
	HIST1H1C	24592
	HIST1H2BD	24592
	HIST1H3B	24592
	HNF1A	24592
	HRAS	24592
	ICOSLG	24592
	IDH1	24592
	IDH2	24592
	IFNGR1	24592
	IGF1	24592
	IGF1R	24592
	IGF2	24592
	IKBKE	24592
	IKZF1	24592
	IL10	24592
	IL7R	24592
	INPP4A	24592
	INPP4B	24592
	INSR	24592
	IRF4	24592
	IRS1	24592
	IRS2	24592
	JAK1	24592
	JAK2	24592
	JAK3	24592
	JUN	24592
	KDM5A	24592
	KDM5C	24592
	KDM6A	24592
	KDR	24592
	KEAP1	24592
	KIT	24592
	KLF4	24592
	KRAS	24592
	LATS1	24592
	LATS2	24592
	LMO1	24592
	MAP2K1	24592
	MAP2K2	24592
	MAP2K4	24592
	MAP3K1	24592
	MAP3K13	24592
	MAPK1	24592
	MAX	24592
	MCL1	24592
	MDC1	24592
	MDM2	24592
	MDM4	24592
	MED12	24592
	MEF2B	24592
	MEN1	24592
	MET	24592
	MITF	24592
	MLH1	24592
	KMT2A	24592
	KMT2D	24592
	KMT2C	24592
	MPL	24592
	MRE11A	24592
	MSH2	24592
	MSH6	24592
	MTOR	24592
	MUTYH	24592
	MYC	24592
	MYCL	24592
	MYCN	24592
	MYD88	24592
	MYOD1	24592
	NBN	24592
	NCOR1	24592
	NF1	24592
	NF2	24592
	NFE2L2	24592
	NKX2-1	24592
	NKX3-1	24592
	NOTCH1	24592
	NOTCH2	24592
	NOTCH3	24592
	NOTCH4	24592
	NPM1	24592
	NRAS	24592
	NSD1	24592
	NTRK1	24592
	NTRK2	24592
	NTRK3	24592
	PAK1	24592
	PAK7	24592
	PALB2	24592
	PARK2	24592
	PARP1	24592
	PAX5	24592
	PBRM1	24592
	PDCD1	24592
	PDGFRA	24592
	PDGFRB	24592
	PDPK1	24592
	PHOX2B	24592
	PIK3C2G	24592
	PIK3C3	24592
	PIK3CA	24592
	PIK3CB	24592
	PIK3CD	24592
	PIK3CG	24592
	PIK3R1	24592
	PIK3R2	24592
	PIK3R3	24592
	PIM1	24592
	PLK2	24592
	PMAIP1	24592
	PMS1	24592
	PMS2	24592
	PNRC1	24592
	POLE	24592
	PPP2R1A	24592
	PRDM1	24592
	PRKAR1A	24592
	PTCH1	24592
	PTEN	24592
	PTPN11	24592
	PTPRD	24592
	PTPRS	24592
	PTPRT	24592
	RAC1	24592
	RAD50	24592
	RAD51	24592
	RAD51C	24592
	RAD51L1	14256
	RAD51L3	14256
	RAD52	24592
	RAD54L	24592
	RAF1	24592
	RARA	24592
	RASA1	24592
	RB1	24592
	RBM10	24592
	RECQL4	24592
	REL	24592
	RET	24592
	RFWD2	24592
	RHOA	24592
	RICTOR	24592
	RIT1	24592
	RNF43	24592
	ROS1	24592
	RPS6KA4	24592
	RPS6KB2	24592
	RPTOR	24592
	RUNX1	24592
	RYBP	24592
	SDHA	24592
	SDHAF2	24592
	SDHB	24592
	SDHC	24592
	SDHD	24592
	SETD2	24592
	SF3B1	24592
	SH2D1A	24592
	SHQ1	24592
	SMAD2	24592
	SMAD3	24592
	SMAD4	24592
	SMARCA4	24592
	SMARCB1	24592
	SMARCD1	24592
	SMO	24592
	SOCS1	24592
	SOX17	24592
	SOX2	24592
	SOX9	24592
	SPEN	24592
	SPOP	24592
	SRC	24592
	STAG2	24592
	STK11	24592
	STK40	24592
	SUFU	24592
	SUZ12	24592
	SYK	24592
	TBX3	24592
	TERT	24592
	TET1	24592
	TET2	24592
	TGFBR1	24592
	TGFBR2	24592
	TMEM127	24592
	TMPRSS2	24592
	TNFAIP3	24592
	TNFRSF14	24592
	TOP1	24592
	TP53	24592
	TP63	24592
	TRAF7	24592
	TSC1	24592
	TSC2	24592
	TSHR	24592
	U2AF1	24592
	VHL	24592
	VTCN1	24592
	WT1	24592
	XIAP	24592
	XPO1	24592
	YAP1	24592
	YES1	24592
	ACVR1	22029
	BIRC3	22029
	CALR	22029
	CD79A	22029
	CEBPA	22029
	CENPA	22029
	CSF3R	22029
	CXCR4	22029
	DNAJB1	22029
	EIF4A2	22029
	EIF4E	22029
	EPHA7	22029
	ERRFI1	22029
	FOXO1	22029
	FYN	22029
	GPS2	22029
	H3F3A	22029
	H3F3B	22029
	HIST1H3A	22029
	HIST1H3C	22029
	HIST1H3D	22029
	HIST1H3E	22029
	HIST1H3F	22029
	HIST1H3G	22029
	HIST1H3H	22029
	HIST1H3I	22029
	HIST1H3J	22029
	HIST2H3C	22029
	HIST2H3D	22029
	HIST3H3	22029
	HLA-A	22029
	HOXB13	22029
	ID3	22029
	INHA	22029
	INHBA	22029
	MAPK3	22029
	MGA	22029
	MST1	22029
	MST1R	22029
	NFKBIA	22029
	PGR	22029
	PLCG2	22029
	POLD1	22029
	PPM1D	22029
	PPP6C	22029
	RAB35	22029
	RAD21	22029
	RHEB	22029
	SH2B3	22029
	SRSF2	22029
	STAT3	22029
	STAT5A	22029
	STAT5B	22029
	TCEB1	22029
	TCF7L2	22029
	XRCC2	22029
	ZFHX3	22029
	ZRSR2	22029
	ANKRD11	22029
	BCL10	22029
	MALT1	22029
	MAP3K14	22029
	NCOA3	22029
	NEGR1	22029
	TCF3	22029
	TRAF2	22029
	VEGFA	22029
	NUP93	22029
	GLI1	22029
	PRKD1	14256
	LYN	14256
	SLX4	14256
	BABAM1	14256
	PPARG	14256
	RRAGC	14256
	STK19	14256
	RRAS2	14256
	RXRA	14256
	KNSTRN	14256
	SOS1	14256
	INPPL1	14256
	FAM58A	14256
	MSH3	14256
	EPAS1	14256
	CSDE1	14256
	ERF	14256
	TEK	14256
	WWTR1	14256
	NTHL1	14256
	ELF3	14256
	SHOC2	14256
	SPRED1	14256
	PDCD1LG2	14256
	CYLD	14256
	EZH1	14256
	SESN1	14256
	SESN2	14256
	SESN3	14256
	DROSHA	14256
	AGO2	14256
	GTF2I	14256
	PRKCI	14256
	CYSLTR2	14256
	RTEL1	14256
	TP53BP1	14256
	UPF1	14256
	RECQL	14256
	KMT5A	14256
	CARM1	14256
	WHSC1	14256
	WHSC1L1	14256
	SMYD3	14256
	PRDM14	14256
	DUSP4	14256
	PTP4A1	14256
	CDC42	14256
	MSI1	14256
	MSI2	14256
	NUF2	14256
	RAC2	14256
	MAPKAP1	14256
	RRAS	14256
	KMT2B	14256
	TAP1	14256
	TAP2	14256
	HLA-B	14256
	PPP4R2	14256
	PREX2	14256

## Sheet: Table S3
Supplementary Table 3: Statistically significant single-codon hotspots
	Hugo Symbol	Reference Amino Acid	Amino Acid Position	Variant Amino Acid	Mutation Count	Total Mutations in Gene	Genomic Position	Organ Types	Total Samples	Analysis Type	qvalue	Mutation_Type
	NRAS	Q	61	R:204|K:142|L:46|H:27|P:2|*:1	422	620	1:115256529_252|1:115256530_143|1:115256528_27	skin:974:187|thyroid:618:71|blood:890:37|bowel:1782:35|lung:2761:17|unk:357:11|softtissue:739:11|testis:217:9|bladder:958:8|cnsbrain:2270:6|ovaryfallopiantube:699:5|biliarytract:358:5|uterus:618:5|headandneck:988:3|thymus:162:3|esophagusstomach:1407:3|pancreas:1059:2|bone:297:1|liver:636:1|kidney:1304:1|adrenalgland:291:1	24592	pancan,skin,thyroid,bowel,blood,lung,softtissue,testis,bladder,cnsbrain,biliarytract,ovaryfallopiantube,uterus,thymus,headandneck,esophagusstomach	0	single-codon
	PIK3CA	E	545	K:575|G:21|Q:20|A:12|D:5	633	2933	3:178936091_595|3:178936092_33|3:178936093_5	breast:2561:174|bowel:1782:97|bladder:958:90|lung:2761:51|headandneck:988:48|esophagusstomach:1407:35|cervix:239:34|uterus:618:30|cnsbrain:2270:22|prostate:1379:8|biliarytract:358:8|kidney:1304:8|skin:974:7|pancreas:1059:5|ovaryfallopiantube:699:5|thyroid:618:3|penis:6:3|testis:217:2|unk:357:1|vulvavagina:16:1|liver:636:1	24592	pancan,breast,bowel,bladder,lung,headandneck,esophagusstomach,cervix,uterus,cnsbrain,kidney,biliarytract,prostate,pancreas,ovaryfallopiantube,skin,penis,thyroid,testis	0	single-codon
	IDH1	R	132	H:570|C:139|G:28|S:16|L:12|I:1	766	916	2:209113112_583|2:209113113_183	cnsbrain:2270:612|biliarytract:358:57|skin:974:25|blood:890:23|prostate:1379:11|lung:2761:8|bone:297:6|bowel:1782:5|liver:636:4|headandneck:988:2|unk:357:2|breast:2561:2|pancreas:1059:2|softtissue:739:2|bladder:958:2|thyroid:618:1|adrenalgland:291:1|thymus:162:1	24592	pancan,cnsbrain,biliarytract,blood,skin,prostate,lung,bone,liver,bowel	0	single-codon
	PIK3CA	H	1047	R:537|L:85|Y:18|Q:7	647	2933	3:178952085_622|3:178952084_18|3:178952086_7	breast:2561:361|bowel:1782:54|uterus:618:51|esophagusstomach:1407:28|cnsbrain:2270:27|headandneck:988:25|bladder:958:20|lung:2761:17|softtissue:739:11|ovaryfallopiantube:699:9|pancreas:1059:7|prostate:1379:6|skin:974:5|unk:357:5|thyroid:618:5|kidney:1304:5|cervix:239:4|biliarytract:358:3|liver:636:3|adrenalgland:291:1	24592	breast,pancan,bowel,uterus,esophagusstomach,cnsbrain,headandneck,bladder,lung,softtissue,ovaryfallopiantube,pancreas,prostate,cervix,skin,thyroid,kidney,biliarytract,liver	0	single-codon
	BRAF	V	600	E:833|M:29|K:24|V:4|R:4|G:3	897	1450	7:140453136_862|7:140453137_29|7:140453135_6	skin:974:357|thyroid:618:316|bowel:1782:113|lung:2761:33|unk:357:21|cnsbrain:2270:20|blood:890:11|pancreas:1059:10|biliarytract:358:4|bladder:958:2|ovaryfallopiantube:699:2|headandneck:988:2|softtissue:739:1|uterus:618:1|breast:2561:1|lymph:366:1|esophagusstomach:1407:1|kidney:1304:1	24592	skin,thyroid,pancan,bowel,lung,cnsbrain,pancreas,blood,biliarytract,ovaryfallopiantube,bladder	0	single-codon
	EGFR	L	858	R:144	144	1164	7:55259515_144	lung:2761:143|bowel:1782:1	24592	lung,pancan	0	single-codon
	TP53	R	175	H:386|G:14|L:8|C:8	416	8466	17:7578406_394|17:7578407_22	bowel:1782:108|esophagusstomach:1407:63|pancreas:1059:39|cnsbrain:2270:33|breast:2561:29|lung:2761:28|headandneck:988:24|ovaryfallopiantube:699:21|uterus:618:14|prostate:1379:14|softtissue:739:12|bladder:958:11|biliarytract:358:5|unk:357:4|kidney:1304:2|thyroid:618:2|skin:974:2|blood:890:1|liver:636:1|cervix:239:1|adrenalgland:291:1|lymph:366:1	24592	pancan,bowel,esophagusstomach,pancreas,breast,cnsbrain,headandneck,ovaryfallopiantube,lung,bladder,softtissue,uterus,prostate	0	single-codon
	KRAS	Q	61	H:108|R:37|L:21|K:20|P:2|E:1|A:1	190	2885	12:25380275_115|12:25380276_54|12:25380277_21	pancreas:1059:64|bowel:1782:31|lung:2761:28|blood:890:17|thyroid:618:8|biliarytract:358:8|testis:217:6|bladder:958:5|esophagusstomach:1407:5|prostate:1379:4|uterus:618:4|unk:357:2|skin:974:2|liver:636:1|cnsbrain:2270:1|breast:2561:1|ampullaofvater:23:1|penis:6:1|softtissue:739:1	24592	pancan,pancreas,bowel,lung,blood,thyroid,biliarytract,testis,uterus,esophagusstomach,bladder,prostate	0	single-codon
	KRAS	G	13	D:214|C:32|V:6|G:6|E:3|R:2|A:1	264	2885	12:25398281_216|12:25398282_34|12:25398280_14	bowel:1782:130|lung:2761:57|esophagusstomach:1407:17|blood:890:12|uterus:618:12|pancreas:1059:7|unk:357:5|cervix:239:4|biliarytract:358:4|lymph:366:3|bladder:958:3|skin:974:2|softtissue:739:2|ovaryfallopiantube:699:1|breast:2561:1|ampullaofvater:23:1|testis:217:1|liver:636:1|cnsbrain:2270:1	24592	pancan,bowel,lung,esophagusstomach,uterus,blood,cervix,pancreas,biliarytract,bladder,lymph	0	single-codon
	TP53	R	248	Q:292|W:222|L:21|P:11|G:8|R:6	560	8466	17:7577538_317|17:7577539_230|17:7577537_13	bowel:1782:98|esophagusstomach:1407:70|cnsbrain:2270:54|lung:2761:51|bladder:958:42|breast:2561:34|uterus:618:33|pancreas:1059:32|ovaryfallopiantube:699:32|headandneck:988:28|skin:974:27|prostate:1379:17|unk:357:10|softtissue:739:8|lymph:366:6|liver:636:5|kidney:1304:4|blood:890:4|biliarytract:358:2|ampullaofvater:23:1|bone:297:1|thymus:162:1	24592	pancan,bowel,esophagusstomach,bladder,cnsbrain,lung,uterus,breast,ovaryfallopiantube,pancreas,skin,headandneck,prostate,softtissue,lymph	0	single-codon
	KRAS	G	12	D:757|V:657|C:384|R:166|A:134|S:68|F:6|L:1|I:1|G:1	2175	2885	12:25398284_1557|12:25398285_617|12:25398283_1	pancreas:1059:745|lung:2761:570|bowel:1782:500|uterus:618:84|unk:357:42|esophagusstomach:1407:40|bladder:958:36|ovaryfallopiantube:699:25|biliarytract:358:21|testis:217:19|breast:2561:15|cervix:239:15|blood:890:13|ampullaofvater:23:10|softtissue:739:8|cnsbrain:2270:6|kidney:1304:5|prostate:1379:4|skin:974:4|headandneck:988:3|thyroid:618:3|lymph:366:2|thymus:162:2|vulvavagina:16:1|bone:297:1|liver…	24592	bowel,lung,pancreas,pancan,uterus,esophagusstomach,bladder,ovaryfallopiantube,biliarytract,cervix,breast,testis,ampullaofvater,blood,softtissue,cnsbrain,kidney,prostate,thyroid,headandneck,skin,thymus	0	single-codon
	TP53	R	273	C:283|H:251|L:56|S:12|P:5|G:2	609	8466	17:7577120_312|17:7577121_297	cnsbrain:2270:113|bowel:1782:105|lung:2761:78|esophagusstomach:1407:74|breast:2561:43|ovaryfallopiantube:699:37|uterus:618:30|headandneck:988:29|pancreas:1059:27|prostate:1379:18|bladder:958:11|kidney:1304:7|unk:357:6|blood:890:5|softtissue:739:5|biliarytract:358:4|liver:636:3|bone:297:3|thyroid:618:3|lymph:366:3|skin:974:2|ampullaofvater:23:1|adrenalgland:291:1|thymus:162:1	24592	pancan,cnsbrain,bowel,lung,esophagusstomach,breast,ovaryfallopiantube,uterus,headandneck,pancreas,bladder,prostate,kidney,blood	0	single-codon
	PIK3CA	E	542	K:356|A:6|Q:5|V:3|G:2	372	2933	3:178936082_361|3:178936083_11	breast:2561:112|bladder:958:46|bowel:1782:45|lung:2761:32|headandneck:988:31|uterus:618:22|esophagusstomach:1407:16|cervix:239:16|cnsbrain:2270:10|kidney:1304:8|unk:357:6|prostate:1379:5|skin:974:4|biliarytract:358:3|softtissue:739:3|thyroid:618:2|testis:217:2|ovaryfallopiantube:699:2|pancreas:1059:2|vulvavagina:16:1|ampullaofvater:23:1|thymus:162:1|liver:636:1|lymph:366:1	24592	pancan,breast,bowel,bladder,lung,headandneck,uterus,esophagusstomach,cervix,cnsbrain,kidney,prostate,softtissue,biliarytract,testis	0	single-codon
	AKT1	E	17	K:148|*:1	149	310	14:105246551_149	breast:2561:80|bowel:1782:13|lung:2761:8|prostate:1379:8|uterus:618:8|bladder:958:6|unk:357:5|cervix:239:3|headandneck:988:3|esophagusstomach:1407:3|thyroid:618:3|ovaryfallopiantube:699:2|cnsbrain:2270:2|liver:636:1|biliarytract:358:1|lymph:366:1|pancreas:1059:1|skin:974:1	24592	pancan,breast,bowel,prostate,uterus,lung,bladder,thyroid,cervix,esophagusstomach,headandneck	1.14603e-288	single-codon
	GNAS	R	201	H:69|C:65|S:3|L:2	139	515	20:57484421_71|20:57484420_68	bowel:1782:53|pancreas:1059:35|esophagusstomach:1407:17|lung:2761:9|unk:357:5|liver:636:4|cervix:239:3|biliarytract:358:3|ovaryfallopiantube:699:2|headandneck:988:1|bone:297:1|bladder:958:1|ampullaofvater:23:1|prostate:1379:1|breast:2561:1|skin:974:1|adrenalgland:291:1	24592	pancan,bowel,pancreas,esophagusstomach,lung,liver,cervix,biliarytract	7.4675e-257	single-codon
	FGFR3	S	249	C:114	114	494	4:1803568_114	bladder:958:103|headandneck:988:5|lung:2761:4|cervix:239:1|kidney:1304:1	24592	bladder,pancan,headandneck,lung	3.4946e-229	single-codon
	PIK3CA	N	345	K:79|I:7|T:4|Y:3|H:3|N:1|D:1	98	2933	3:178921553_80|3:178921552_11|3:178921551_7	breast:2561:51|uterus:618:11|bowel:1782:9|lung:2761:7|esophagusstomach:1407:5|headandneck:988:4|prostate:1379:3|cnsbrain:2270:3|bladder:958:2|softtissue:739:2|testis:217:1	24592	pancan,breast,uterus,bowel,lung,esophagusstomach,headandneck,cnsbrain,prostate,softtissue	3.86928e-219	single-codon
	PTEN	R	130	Q:72|G:44|*:38|P:6|L:5|R:2|S:1	168	1101	10:89692905_83|10:89692904_83|10:89692906_1|10:89692903_1	uterus:618:83|breast:2561:14|cnsbrain:2270:14|bowel:1782:13|lung:2761:8|prostate:1379:8|skin:974:5|headandneck:988:4|cervix:239:4|esophagusstomach:1407:3|biliarytract:358:2|ovaryfallopiantube:699:2|kidney:1304:2|softtissue:739:2|thyroid:618:1|penis:6:1|unk:357:1|pleura:76:1	24592	pancan,uterus,breast,bowel,prostate,lung,cnsbrain,skin,headandneck,cervix	1.91659e-210	single-codon
	HRAS	Q	61	R:56|K:28|L:16|H:2	102	275	11:533874_72|11:533875_28|11:533873_2	thyroid:618:22|bladder:958:19|adrenalgland:291:17|skin:974:11|headandneck:988:11|prostate:1379:10|softtissue:739:3|lung:2761:3|cnsbrain:2270:2|vulvavagina:16:1|esophagusstomach:1407:1|thymus:162:1|breast:2561:1	24592	pancan,adrenalgland,thyroid,bladder,prostate,headandneck,skin,softtissue,lung	8.14543e-210	single-codon
	TP53	Y	220	C:127|S:8|H:6|D:4|*:4|N:3	152	8466	17:7578190_135|17:7578191_13|17:7578189_4	cnsbrain:2270:22|lung:2761:20|ovaryfallopiantube:699:20|breast:2561:18|headandneck:988:12|pancreas:1059:11|esophagusstomach:1407:11|liver:636:7|bowel:1782:7|softtissue:739:6|uterus:618:6|prostate:1379:4|bladder:958:3|unk:357:2|kidney:1304:2|skin:974:1	24592	pancan,cnsbrain,ovaryfallopiantube,breast,lung,pancreas,headandneck,esophagusstomach,uterus,softtissue,bowel,liver,prostate,bladder	4.53757e-208	single-codon
	TP53	G	245	S:128|D:50|V:31|C:22|R:7|A:3|N:1	242	8466	17:7577548_157|17:7577547_85	bowel:1782:49|lung:2761:40|esophagusstomach:1407:25|headandneck:988:19|cnsbrain:2270:17|pancreas:1059:15|ovaryfallopiantube:699:15|prostate:1379:14|breast:2561:13|bladder:958:9|uterus:618:7|skin:974:4|liver:636:3|kidney:1304:3|softtissue:739:2|biliarytract:358:2|lymph:366:1|cervix:239:1|ampullaofvater:23:1|bone:297:1|thyroid:618:1	24592	pancan,bowel,lung,esophagusstomach,headandneck,ovaryfallopiantube,cnsbrain,breast,pancreas,prostate,bladder,uterus	8.54723e-208	single-codon
	TP53	R	213	*:208|Q:25|L:17|G:4|P:2	256	8466	17:7578212_212|17:7578211_44	bowel:1782:48|esophagusstomach:1407:31|lung:2761:22|breast:2561:20|headandneck:988:19|skin:974:18|pancreas:1059:17|bladder:958:12|uterus:618:10|cnsbrain:2270:10|kidney:1304:8|ovaryfallopiantube:699:7|softtissue:739:7|prostate:1379:7|liver:636:4|thyroid:618:3|unk:357:3|lymph:366:2|biliarytract:358:2|adrenalgland:291:2|penis:6:1|vulvavagina:16:1|ampullaofvater:23:1|cervix:239:1	24592	pancan,bowel,esophagusstomach,headandneck,lung,skin,breast,pancreas,kidney,bladder,softtissue,ovaryfallopiantube,cnsbrain,uterus,prostate	1.29097e-203	single-codon
	FBXW7	R	465	C:64|H:59|S:2|P:1|L:1|G:1	128	795	4:153249385_67|4:153249384_61	bowel:1782:53|uterus:618:25|esophagusstomach:1407:15|bladder:958:7|lung:2761:6|cervix:239:5|cnsbrain:2270:4|headandneck:988:3|biliarytract:358:2|ovaryfallopiantube:699:2|breast:2561:2|blood:890:1|lymph:366:1|pleura:76:1|pancreas:1059:1	24592	pancan,bowel,uterus,esophagusstomach,bladder,cervix,lung,cnsbrain	1.92462e-192	single-codon
	PIK3CA	Q	546	K:35|R:31|P:19|H:5|E:2|L:1	93	2933	3:178936095_51|3:178936094_36|3:178936096_5|3:178936093_1	breast:2561:22|bowel:1782:21|uterus:618:15|cnsbrain:2270:6|bladder:958:5|headandneck:988:5|prostate:1379:4|esophagusstomach:1407:4|softtissue:739:3|ovaryfallopiantube:699:2|skin:974:1|unk:357:1|thyroid:618:1|biliarytract:358:1|lung:2761:1|cervix:239:1	24592	pancan,breast,bowel,uterus,cnsbrain,bladder,headandneck,prostate,esophagusstomach,softtissue	1.38151e-185	single-codon
	ERBB2	S	310	F:95|Y:17|S:1	113	726	17:37868208_112|17:37868209_1	bladder:958:56|breast:2561:12|esophagusstomach:1407:10|cervix:239:7|skin:974:6|bowel:1782:6|lung:2761:4|unk:357:3|biliarytract:358:3|headandneck:988:3|ovaryfallopiantube:699:2|softtissue:739:1	24592	pancan,bladder,breast,esophagusstomach,cervix,bowel,biliarytract,skin,lung	1.98485e-185	single-codon
	GNA11	Q	209	L:57|P:1|H:1	59	195	19:3118942_58|19:3118943_1	eye:128:52|skin:974:6|bowel:1782:1	24592	eye,pancan,skin	3.5382e-183	single-codon
	GNAQ	Q	209	P:42|L:22|H:1	65	206	9:80409488_64|9:80409487_1	eye:128:57|skin:974:6|testis:217:1|lung:2761:1	24592	eye,pancan,skin	4.59258e-172	single-codon
	GTF2I	L	424	H:68	68	162	7:74146970_68	thymus:162:68	14256	thymus,pancan	3.81658e-165	single-codon
	TP53	R	282	W:201|G:9|P:4|Q:3|R:1|L:1	219	8466	17:7577094_210|17:7577093_8|17:7577092_1	bowel:1782:60|esophagusstomach:1407:34|pancreas:1059:22|cnsbrain:2270:21|headandneck:988:18|lung:2761:14|skin:974:8|prostate:1379:8|bladder:958:8|ovaryfallopiantube:699:8|breast:2561:4|lymph:366:2|thymus:162:2|softtissue:739:2|biliarytract:358:2|uterus:618:2|kidney:1304:2|liver:636:1|cervix:239:1	24592	pancan,bowel,esophagusstomach,pancreas,headandneck,cnsbrain,bladder,lung,ovaryfallopiantube,skin,prostate	5.73632e-160	single-codon
	CTNNB1	S	37	F:55|C:27|A:9|P:7|Y:5	103	800	3:41266113_87|3:41266112_16	uterus:618:27|lung:2761:25|liver:636:12|esophagusstomach:1407:11|bladder:958:7|cnsbrain:2270:5|prostate:1379:4|pancreas:1059:3|cervix:239:2|bowel:1782:2|headandneck:988:1|ovaryfallopiantube:699:1|skin:974:1|unk:357:1|breast:2561:1	24592	pancan,lung,uterus,liver,esophagusstomach,bladder,cnsbrain,prostate	2.59381e-157	single-codon
	CTNNB1	D	32	Y:22|N:18|V:16|G:16|H:6|A:3	81	800	3:41266097_46|3:41266098_35	liver:636:28|uterus:618:18|prostate:1379:8|cnsbrain:2270:6|lung:2761:4|esophagusstomach:1407:4|skin:974:3|bowel:1782:2|pancreas:1059:2|cervix:239:2|adrenalgland:291:1|ovaryfallopiantube:699:1|biliarytract:358:1|bladder:958:1	24592	pancan,liver,uterus,prostate,cnsbrain,skin,esophagusstomach,lung,cervix	8.30437e-155	single-codon
	SMAD4	R	361	H:60|C:54|S:4|G:3|L:2|P:1	124	735	18:48591919_63|18:48591918_61	bowel:1782:59|pancreas:1059:22|esophagusstomach:1407:17|biliarytract:358:7|lung:2761:5|breast:2561:4|bladder:958:3|cervix:239:2|uterus:618:1|skin:974:1|ampullaofvater:23:1|prostate:1379:1|headandneck:988:1	24592	pancan,bowel,esophagusstomach,pancreas,biliarytract,lung,breast	1.13408e-154	single-codon
	TP53	H	179	R:63|Y:41|L:14|Q:12|N:8|D:8|P:3	149	8466	17:7578394_80|17:7578395_57|17:7578393_12	lung:2761:33|breast:2561:17|cnsbrain:2270:16|pancreas:1059:13|headandneck:988:13|esophagusstomach:1407:11|bowel:1782:9|skin:974:6|uterus:618:6|ovaryfallopiantube:699:6|prostate:1379:4|liver:636:3|softtissue:739:3|bladder:958:3|unk:357:2|bone:297:1|thyroid:618:1|blood:890:1|biliarytract:358:1	24592	pancan,lung,cnsbrain,breast,pancreas,headandneck,esophagusstomach,bowel,uterus,ovaryfallopiantube,prostate	9.18618e-150	single-codon
	CTNNB1	S	33	C:32|F:29|P:16|Y:11|A:7|T:1	96	800	3:41266101_72|3:41266100_24	uterus:618:24|liver:636:23|lung:2761:11|cnsbrain:2270:8|prostate:1379:8|esophagusstomach:1407:5|bladder:958:5|ovaryfallopiantube:699:3|bowel:1782:3|pancreas:1059:1|skin:974:1|unk:357:1|thyroid:618:1|headandneck:988:1|cervix:239:1	24592	pancan,liver,uterus,lung,prostate,cnsbrain,esophagusstomach,bladder,ovaryfallopiantube	1.29716e-144	single-codon
	KRAS	A	146	T:65|V:16|P:5	86	2885	12:25378562_70|12:25378561_16	bowel:1782:56|blood:890:6|esophagusstomach:1407:6|testis:217:5|lung:2761:5|unk:357:4|bladder:958:2|pancreas:1059:1|cervix:239:1	24592	pancan,bowel,esophagusstomach,blood,lung,testis	5.76479e-140	single-codon
	CTNNB1	T	41	A:45|I:19|N:2	66	800	3:41266124_45|3:41266125_21	liver:636:15|bowel:1782:11|prostate:1379:10|uterus:618:8|skin:974:6|lung:2761:5|ampullaofvater:23:2|unk:357:2|softtissue:739:2|ovaryfallopiantube:699:1|biliarytract:358:1|bladder:958:1|pancreas:1059:1|adrenalgland:291:1	24592	pancan,liver,prostate,bowel,uterus,skin,lung,ampullaofvater,softtissue	1.16455e-135	single-codon
	EGFR	T	790	M:59|T:1	60	1164	7:55249071_59|7:55249072_1	lung:2761:59|ovaryfallopiantube:699:1	24592	lung,pancan	1.11201e-133	single-codon
	NRAS	G	12	D:41|C:11|S:8|A:6|V:5|R:3	74	620	1:115258747_52|1:115258748_22	bowel:1782:30|blood:890:11|skin:974:11|unk:357:4|testis:217:4|uterus:618:4|headandneck:988:3|esophagusstomach:1407:2|cnsbrain:2270:1|ovaryfallopiantube:699:1|bladder:958:1|biliarytract:358:1|kidney:1304:1	24592	pancan,bowel,skin,blood,testis,uterus,headandneck	3.67051e-130	single-codon
	SF3B1	K	700	E:57|R:1|K:1	59	638	2:198266834_57|2:198266833_1|2:198266832_1	breast:2561:28|blood:890:15|pancreas:1059:5|biliarytract:358:2|lung:2761:2|kidney:1304:2|cnsbrain:2270:1|prostate:1379:1|softtissue:739:1|lymph:366:1|thymus:162:1	24592	pancan,breast,blood,pancreas,biliarytract	1.51874e-126	single-codon
	TP53	H	193	R:54|Y:31|L:19|P:8|N:5|D:5|Q:1	123	8466	17:7578271_81|17:7578272_41|17:7578270_1	breast:2561:18|lung:2761:18|cnsbrain:2270:14|headandneck:988:10|esophagusstomach:1407:9|ovaryfallopiantube:699:9|pancreas:1059:7|uterus:618:7|liver:636:6|bladder:958:6|prostate:1379:4|bowel:1782:3|kidney:1304:3|softtissue:739:3|blood:890:2|bone:297:1|thymus:162:1|unk:357:1|cervix:239:1	24592	pancan,breast,cnsbrain,lung,headandneck,uterus,ovaryfallopiantube,esophagusstomach,bladder,pancreas,liver	1.47915e-124	single-codon
	ESR1	D	538	G:46	46	427	6:152419926_46	breast:2561:42|uterus:618:2|ovaryfallopiantube:699:1|unk:357:1	24592	breast,pancan	1.28856e-123	single-codon
	FBXW7	R	505	C:41|G:31|L:4|H:4|P:2|S:1	83	795	4:153247289_73|4:153247288_10	bowel:1782:23|uterus:618:14|bladder:958:10|headandneck:988:9|esophagusstomach:1407:7|lung:2761:5|cervix:239:4|skin:974:3|unk:357:2|blood:890:1|biliarytract:358:1|cnsbrain:2270:1|pancreas:1059:1|softtissue:739:1|ovaryfallopiantube:699:1	24592	pancan,bowel,uterus,bladder,headandneck,esophagusstomach,cervix,lung	5.90349e-120	single-codon
	IDH2	R	172	K:33|G:9|S:8|W:7|M:4|T:1|R:1	63	190	15:90631838_38|15:90631839_16|15:90631837_9	cnsbrain:2270:34|biliarytract:358:9|lymph:366:8|blood:890:3|headandneck:988:2|liver:636:2|kidney:1304:1|unk:357:1|bone:297:1|bladder:958:1|bowel:1782:1	24592	pancan,cnsbrain,lymph,biliarytract,blood	1.20403e-117	single-codon
	U2AF1	S	34	F:81|Y:4	85	192	21:44524456_85	lung:2761:41|bladder:958:9|pancreas:1059:9|blood:890:8|uterus:618:7|biliarytract:358:2|cervix:239:2|unk:357:1|bowel:1782:1|lymph:366:1|skin:974:1|breast:2561:1|prostate:1379:1|headandneck:988:1	24592	pancan,lung,pancreas,blood,bladder,uterus	4.35041e-116	single-codon
	EGFR	A	289	V:37|T:14|D:6|N:1|I:1	59	1164	7:55221822_43|7:55221821_16	cnsbrain:2270:56|lung:2761:2|headandneck:988:1	24592	cnsbrain,pancan	5.81115e-116	single-codon
	ESR1	Y	537	S:25|C:11|N:10|D:1	47	427	6:152419923_35|6:152419922_12	breast:2561:39|uterus:618:7|skin:974:1	24592	breast,pancan,uterus	6.21076e-115	single-codon
	CDKN2A	R	80	*:97|Q:2	99	769	9:21971120_97|9:21971119_2	headandneck:988:26|skin:974:17|pancreas:1059:12|esophagusstomach:1407:11|lung:2761:11|bowel:1782:5|bladder:958:5|unk:357:3|kidney:1304:2|uterus:618:2|thymus:162:1|biliarytract:358:1|lymph:366:1|cnsbrain:2270:1|prostate:1379:1	24592	pancan,headandneck,skin,pancreas,esophagusstomach,lung,bladder,bowel	1.17629e-111	single-codon
	CTNNB1	S	45	F:31|P:29|C:5|Y:4|A:2	71	800	3:41266137_40|3:41266136_31	liver:636:13|bowel:1782:9|skin:974:8|bladder:958:6|prostate:1379:6|adrenalgland:291:6|lung:2761:5|biliarytract:358:4|pancreas:1059:4|uterus:618:4|ampullaofvater:23:2|esophagusstomach:1407:1|cnsbrain:2270:1|softtissue:739:1|unk:357:1	24592	pancan,liver,adrenalgland,skin,prostate,biliarytract,bowel,bladder,lung,pancreas	2.67103e-111	single-codon
	TP53	C	176	F:54|Y:30|S:9|W:7|R:5|G:5|*:4|C:1	115	8466	17:7578403_86|17:7578404_17|17:7578402_12	bowel:1782:19|esophagusstomach:1407:16|lung:2761:16|breast:2561:13|ovaryfallopiantube:699:12|headandneck:988:9|pancreas:1059:7|prostate:1379:5|lymph:366:4|cnsbrain:2270:4|bone:297:2|kidney:1304:2|liver:636:1|uterus:618:1|unk:357:1|biliarytract:358:1|blood:890:1|bladder:958:1	24592	pancan,bowel,esophagusstomach,breast,ovaryfallopiantube,lung,headandneck,pancreas,lymph,prostate	2.79789e-94	single-codon
	PIK3CA	R	88	Q:75	75	2933	3:178916876_75	uterus:618:23|bowel:1782:20|cnsbrain:2270:10|esophagusstomach:1407:6|breast:2561:5|bladder:958:3|headandneck:988:3|lung:2761:1|ovaryfallopiantube:699:1|biliarytract:358:1|unk:357:1|prostate:1379:1	24592	pancan,uterus,bowel,cnsbrain,esophagusstomach,breast	7.11268e-94	single-codon
	ERBB3	V	104	M:40|L:21	61	696	12:56478854_60|12:56478853_1	bowel:1782:16|bladder:958:13|esophagusstomach:1407:12|uterus:618:8|breast:2561:4|cervix:239:4|biliarytract:358:3|pancreas:1059:1	24592	pancan,bladder,bowel,esophagusstomach,uterus,cervix,breast,biliarytract	2.90076e-90	single-codon
	PIK3CA	M	1043	V:25|I:25|T:4|L:4	58	2933	3:178952072_29|3:178952074_25|3:178952073_4	uterus:618:13|cnsbrain:2270:11|breast:2561:11|bowel:1782:7|headandneck:988:4|lung:2761:4|thyroid:618:3|esophagusstomach:1407:2|softtissue:739:1|bladder:958:1|pancreas:1059:1	24592	pancan,uterus,cnsbrain,breast,bowel,headandneck,thyroid	1.37439e-88	single-codon
	TP53	Y	163	C:54|H:11|N:9|D:3|*:2	79	8466	17:7578442_54|17:7578443_23|17:7578441_2	lung:2761:21|ovaryfallopiantube:699:11|headandneck:988:9|cnsbrain:2270:7|breast:2561:6|esophagusstomach:1407:4|liver:636:4|bowel:1782:4|prostate:1379:3|pancreas:1059:2|uterus:618:2|softtissue:739:2|skin:974:1|bladder:958:1|ampullaofvater:23:1|lymph:366:1	24592	pancan,lung,ovaryfallopiantube,headandneck,cnsbrain,breast,liver,bowel,esophagusstomach	6.75581e-86	single-codon
	ERBB2	L	755	S:31|P:5|M:3|L:2|A:2|W:1	44	726	17:37880220_32|17:37880219_12	breast:2561:21|lung:2761:6|bowel:1782:4|uterus:618:3|bladder:958:3|esophagusstomach:1407:3|ampullaofvater:23:1|biliarytract:358:1|kidney:1304:1|skin:974:1	24592	pancan,breast,lung,bowel,uterus,esophagusstomach,bladder	1.41039e-85	single-codon
	TP53	R	342	*:129|P:8	137	8466	17:7574003_129|17:7574002_8	breast:2561:26|bowel:1782:24|esophagusstomach:1407:16|lung:2761:11|skin:974:10|pancreas:1059:10|headandneck:988:8|cnsbrain:2270:6|ovaryfallopiantube:699:6|uterus:618:4|softtissue:739:4|bladder:958:3|unk:357:2|biliarytract:358:2|liver:636:1|bone:297:1|ampullaofvater:23:1|prostate:1379:1|thymus:162:1	24592	pancan,breast,bowel,skin,esophagusstomach,pancreas,headandneck,lung,ovaryfallopiantube	1.47221e-85	single-codon
	TP53	R	196	*:131|P:8|Q:1|L:1	141	8466	17:7578263_131|17:7578262_10	bowel:1782:25|esophagusstomach:1407:21|headandneck:988:17|breast:2561:17|pancreas:1059:13|cnsbrain:2270:13|lung:2761:10|skin:974:8|ovaryfallopiantube:699:6|kidney:1304:2|unk:357:2|prostate:1379:2|blood:890:1|biliarytract:358:1|uterus:618:1|bladder:958:1|lymph:366:1	24592	pancan,bowel,breast,headandneck,esophagusstomach,pancreas,cnsbrain,skin,lung,ovaryfallopiantube	4.00458e-85	single-codon
	H3F3A	K	28	M:32|R:1	33	98	1:226252135_33	cnsbrain:2270:32|pancreas:1059:1	22029	cnsbrain,pancan	5.32945e-83	single-codon
	FGFR3	Y	373	C:32	32	494	4:1806099_32	bladder:958:31|kidney:1304:1	24592	bladder,pancan	7.4658e-83	single-codon
	BRAF	G	469	A:34|V:11|R:8|E:4|S:2|G:1|*:1	61	1450	7:140481402_51|7:140481403_9|7:140481401_1	lung:2761:23|skin:974:13|bowel:1782:6|blood:890:3|bladder:958:2|unk:357:2|cnsbrain:2270:2|lymph:366:2|prostate:1379:2|biliarytract:358:1|uterus:618:1|headandneck:988:1|esophagusstomach:1407:1|thyroid:618:1|adrenalgland:291:1	24592	pancan,lung,skin,bowel,blood	3.65455e-82	single-codon
	PIK3CA	C	420	R:46	46	2933	3:178927980_46	breast:2561:15|bowel:1782:7|lung:2761:5|headandneck:988:4|uterus:618:4|cnsbrain:2270:3|prostate:1379:2|esophagusstomach:1407:2|ovaryfallopiantube:699:1|biliarytract:358:1|softtissue:739:1|unk:357:1	24592	pancan,breast,bowel,headandneck,lung,uterus,cnsbrain	2.59824e-80	single-codon
	HRAS	G	13	R:22|V:15|D:6|C:3|S:2|N:1|I:1	50	275	11:534286_27|11:534285_23	headandneck:988:16|bladder:958:11|skin:974:7|lung:2761:6|thymus:162:3|breast:2561:2|adrenalgland:291:2|unk:357:1|softtissue:739:1|bowel:1782:1	24592	pancan,headandneck,bladder,skin,lung,thymus,adrenalgland	5.50414e-80	single-codon
	CTNNB1	G	34	R:28|V:14|E:8|L:1|A:1|*:1	53	800	3:41266103_30|3:41266104_23	uterus:618:15|liver:636:9|lung:2761:8|cnsbrain:2270:4|skin:974:4|adrenalgland:291:3|prostate:1379:2|unk:357:2|esophagusstomach:1407:2|bowel:1782:1|bladder:958:1|pancreas:1059:1|headandneck:988:1	24592	pancan,uterus,liver,lung,cnsbrain,adrenalgland	2.21028e-79	single-codon
	TP53	I	195	T:42|F:19|N:10|S:4|M:2|K:1|I:1	79	8466	17:7578265_56|17:7578266_19|17:7578264_4	breast:2561:16|ovaryfallopiantube:699:13|lung:2761:9|pancreas:1059:7|esophagusstomach:1407:7|cnsbrain:2270:6|blood:890:4|headandneck:988:4|bowel:1782:4|liver:636:3|uterus:618:2|pleura:76:1|bladder:958:1|ampullaofvater:23:1|softtissue:739:1	24592	pancan,breast,ovaryfallopiantube,pancreas,esophagusstomach,cnsbrain,lung,headandneck,blood,bowel	5.3118e-77	single-codon
	CDKN2A	H	83	Y:48|D:6|R:4|Q:2|N:2	62	769	9:21971111_56|9:21971110_4|9:21971109_2	lung:2761:12|pancreas:1059:12|skin:974:7|esophagusstomach:1407:6|headandneck:988:4|bladder:958:4|biliarytract:358:3|cnsbrain:2270:3|breast:2561:3|ovaryfallopiantube:699:2|softtissue:739:2|bowel:1782:2|vulvavagina:16:1|liver:636:1	24592	pancan,pancreas,skin,lung,esophagusstomach,bladder,headandneck,breast,biliarytract	1.30941e-75	single-codon
	TP53	splice	X187_splice	splice:100	100	8466	17:7578370_52|17:7578290_31|17:7578291_11|17:7578369_4|17:7578289_2	lung:2761:20|breast:2561:14|esophagusstomach:1407:11|ovaryfallopiantube:699:11|headandneck:988:7|skin:974:7|bowel:1782:7|pancreas:1059:6|softtissue:739:5|cnsbrain:2270:4|bladder:958:2|uterus:618:2|blood:890:1|prostate:1379:1|kidney:1304:1|liver:636:1	24592	pancan,breast,lung,esophagusstomach,ovaryfallopiantube,headandneck,bowel,pancreas,skin,softtissue	1.82473e-75	single-codon
	TP53	G	266	R:40|E:35|V:26|*:14|T:1|K:1	117	8466	17:7577141_63|17:7577142_54	lung:2761:21|bowel:1782:12|pancreas:1059:11|breast:2561:9|cnsbrain:2270:9|headandneck:988:8|skin:974:7|ovaryfallopiantube:699:7|esophagusstomach:1407:6|uterus:618:5|bladder:958:4|prostate:1379:3|softtissue:739:3|blood:890:2|biliarytract:358:2|liver:636:2|pleura:76:1|ampullaofvater:23:1|kidney:1304:1|vulvavagina:16:1|lymph:366:1|unk:357:1	24592	pancan,bowel,lung,pancreas,cnsbrain,ovaryfallopiantube,breast,headandneck,uterus,esophagusstomach	1.57993e-74	single-codon
	TP53	R	249	S:45|M:17|G:15|W:11|T:11|K:2|I:1	102	8466	17:7577534_47|17:7577535_30|17:7577536_25	lung:2761:33|liver:636:13|breast:2561:7|esophagusstomach:1407:6|headandneck:988:6|cnsbrain:2270:6|pancreas:1059:5|prostate:1379:4|uterus:618:4|skin:974:3|unk:357:3|bowel:1782:3|bladder:958:3|thyroid:618:2|lymph:366:1|softtissue:739:1|adrenalgland:291:1|ovaryfallopiantube:699:1	24592	pancan,lung,liver,breast,headandneck,esophagusstomach,cnsbrain	1.28533e-72	single-codon
	SF3B1	R	625	H:29|C:25|L:4|G:1	59	638	2:198267483_33|2:198267484_26	eye:128:27|bowel:1782:10|skin:974:7|headandneck:988:3|vulvavagina:16:3|blood:890:2|bladder:958:2|softtissue:739:1|breast:2561:1|kidney:1304:1|pancreas:1059:1|lymph:366:1	24592	pancan,eye,bowel,skin,vulvavagina,headandneck	1.54073e-72	single-codon
	BRAF	K	601	E:32|N:5|T:1	38	1450	7:140453134_32|7:140453132_4|7:140453133_1|7:140453131_1	skin:974:8|lung:2761:6|prostate:1379:6|lymph:366:4|bowel:1782:2|uterus:618:2|unk:357:2|thyroid:618:2|esophagusstomach:1407:2|blood:890:1|breast:2561:1|headandneck:988:1|biliarytract:358:1	24592	pancan,skin,prostate,lung,lymph,thyroid	1.94975e-70	single-codon
	BRAF	D	594	N:24|G:21|Y:2|V:2|H:1|E:1	51	1450	7:140453155_27|7:140453154_23|7:140453153_1	bowel:1782:12|lung:2761:10|bladder:958:6|skin:974:6|blood:890:3|unk:357:3|lymph:366:2|esophagusstomach:1407:2|testis:217:1|cervix:239:1|prostate:1379:1|biliarytract:358:1|headandneck:988:1|cnsbrain:2270:1|adrenalgland:291:1	24592	pancan,bowel,lung,skin,blood,bladder	9.78698e-70	single-codon
	EZH2	Y	646	N:13|F:13|H:6|S:4|Y:1|C:1	38	312	7:148508728_19|7:148508727_18|7:148508726_1	lymph:366:23|skin:974:10|bone:297:3|unk:357:1|biliarytract:358:1	24592	pancan,lymph,skin,bone	6.87377e-69	single-codon
	TP53	Y	234	C:42|H:9|N:6|*:6|S:3|D:2	68	8466	17:7577580_45|17:7577581_17|17:7577579_6	lung:2761:11|cnsbrain:2270:7|breast:2561:6|ovaryfallopiantube:699:6|pancreas:1059:5|esophagusstomach:1407:5|bowel:1782:3|bladder:958:3|headandneck:988:3|softtissue:739:3|prostate:1379:3|liver:636:2|biliarytract:358:2|unk:357:2|skin:974:2|vulvavagina:16:1|ampullaofvater:23:1|bone:297:1|kidney:1304:1|adrenalgland:291:1	24592	pancan,lung,cnsbrain,pancreas,breast,ovaryfallopiantube,esophagusstomach,softtissue,bladder	4.21074e-68	single-codon
	DNMT3A	R	882	H:28|C:10|P:1	39	495	2:25457242_29|2:25457243_10	blood:890:30|lymph:366:4|pleura:76:1|breast:2561:1|cnsbrain:2270:1|bowel:1782:1|lung:2761:1	24592	blood,pancan,lymph	1.73894e-67	single-codon
	BCOR	N	1459	S:36	36	700	X:39921444_36	uterus:618:23|lung:2761:8|unk:357:2|ovaryfallopiantube:699:2|bowel:1782:1	24592	pancan,uterus,lung	2.04351e-67	single-codon
	PPP2R1A	P	179	R:29|L:1	30	358	19:52715971_30	uterus:618:27|ovaryfallopiantube:699:1|unk:357:1|softtissue:739:1	24592	uterus,pancan	3.79894e-66	single-codon
	RAC1	P	29	S:43|L:7|T:2|F:1	53	157	7:6426892_46|7:6426893_7	skin:974:42|unk:357:4|headandneck:988:3|thyroid:618:1|breast:2561:1|softtissue:739:1|uterus:618:1	24592	skin,pancan	1.55868e-65	single-codon
	PIK3CA	G	118	D:40	40	2933	3:178917478_40	breast:2561:9|uterus:618:8|cnsbrain:2270:8|bowel:1782:2|headandneck:988:2|lung:2761:2|esophagusstomach:1407:2|ampullaofvater:23:1|prostate:1379:1|thyroid:618:1|pancreas:1059:1|cervix:239:1|bladder:958:1|kidney:1304:1	24592	pancan,breast,uterus,cnsbrain	1.60829e-65	single-codon
	FBXW7	R	479	Q:31|G:8|*:8|P:7|L:2|R:1	57	795	4:153247366_40|4:153247367_17	uterus:618:12|bowel:1782:12|bladder:958:8|headandneck:988:5|cervix:239:4|lung:2761:4|esophagusstomach:1407:4|breast:2561:2|lymph:366:1|penis:6:1|kidney:1304:1|cnsbrain:2270:1|skin:974:1|eye:128:1	24592	pancan,uterus,bowel,bladder,headandneck,cervix,esophagusstomach,lung	4.37689e-63	single-codon
	TP53	splice	X307_splice	splice:77	77	8466	17:7577018_28|17:7576928_20|17:7576927_19|17:7577017_9|17:7576926_1	lung:2761:16|bowel:1782:9|headandneck:988:9|breast:2561:7|esophagusstomach:1407:6|ovaryfallopiantube:699:6|liver:636:4|cnsbrain:2270:4|bladder:958:3|unk:357:3|pancreas:1059:2|softtissue:739:2|prostate:1379:2|biliarytract:358:1|skin:974:1|kidney:1304:1|adrenalgland:291:1	24592	pancan,lung,headandneck,bowel,breast,ovaryfallopiantube,esophagusstomach,cnsbrain,bladder	1.53644e-62	single-codon
	TP53	V	173	L:42|M:27|G:4|A:4|E:1	78	8466	17:7578413_69|17:7578412_9	bowel:1782:12|esophagusstomach:1407:10|lung:2761:9|headandneck:988:7|breast:2561:6|cnsbrain:2270:6|pancreas:1059:4|bone:297:3|uterus:618:3|bladder:958:3|ovaryfallopiantube:699:3|lymph:366:3|prostate:1379:2|unk:357:2|skin:974:1|ampullaofvater:23:1|pleura:76:1|liver:636:1|adrenalgland:291:1	24592	pancan,bowel,esophagusstomach,headandneck,cnsbrain,breast,lung,pancreas,uterus	7.25981e-62	single-codon
	TP53	C	238	Y:40|F:23|R:5|S:4|G:4|W:1	77	8466	17:7577568_65|17:7577569_11|17:7577567_1	lung:2761:11|pancreas:1059:8|cnsbrain:2270:8|bladder:958:6|uterus:618:6|bowel:1782:5|esophagusstomach:1407:5|ovaryfallopiantube:699:5|breast:2561:5|headandneck:988:5|prostate:1379:3|softtissue:739:3|blood:890:2|skin:974:2|liver:636:1|lymph:366:1|cervix:239:1	24592	pancan,pancreas,uterus,bladder,cnsbrain,lung,bowel,headandneck,esophagusstomach,breast,ovaryfallopiantube	7.74652e-62	single-codon
	PPP2R1A	R	183	W:33|Q:17|G:1	51	358	19:52715982_34|19:52715983_17	bowel:1782:12|uterus:618:11|ovaryfallopiantube:699:6|breast:2561:4|lung:2761:3|headandneck:988:3|prostate:1379:3|esophagusstomach:1407:2|thyroid:618:1|pancreas:1059:1|biliarytract:358:1|unk:357:1|softtissue:739:1|bladder:958:1|eye:128:1	24592	pancan,bowel,uterus,ovaryfallopiantube,breast,headandneck,prostate	9.62646e-61	single-codon
	MYD88	L	265	P:37	37	140	3:38182641_37	lymph:366:19|blood:890:13|lung:2761:2|peritoneum:16:1|bowel:1782:1|bladder:958:1	24592	pancan,lymph,blood	1.26354e-60	single-codon
	TP53	splice	X126_splice	splice:75	75	8466	17:7578555_46|17:7578556_29	lung:2761:14|breast:2561:11|esophagusstomach:1407:8|ovaryfallopiantube:699:7|bowel:1782:5|pancreas:1059:5|uterus:618:4|cnsbrain:2270:4|prostate:1379:3|liver:636:2|skin:974:2|blood:890:2|unk:357:2|biliarytract:358:1|kidney:1304:1|bladder:958:1|bone:297:1|softtissue:739:1|headandneck:988:1	24592	pancan,breast,lung,esophagusstomach,ovaryfallopiantube,pancreas,bowel,uterus	5.81978e-59	single-codon
	NRAS	G	13	R:18|D:16|S:3|C:2|V:1|F:1	41	620	1:115258745_23|1:115258744_18	blood:890:13|bowel:1782:10|skin:974:7|biliarytract:358:2|cnsbrain:2270:2|testis:217:1|unk:357:1|softtissue:739:1|lung:2761:1|lymph:366:1|bladder:958:1|esophagusstomach:1407:1	24592	pancan,blood,bowel,skin	3.59719e-58	single-codon
	TP53	Y	205	C:35|H:8|S:6|F:6|D:3|N:2|*:1	61	8466	17:7578235_47|17:7578236_13|17:7578234_1	lung:2761:9|esophagusstomach:1407:7|breast:2561:7|bowel:1782:7|pancreas:1059:6|liver:636:4|cnsbrain:2270:4|lymph:366:3|unk:357:2|ovaryfallopiantube:699:2|uterus:618:2|headandneck:988:2|blood:890:1|bladder:958:1|biliarytract:358:1|skin:974:1|softtissue:739:1|kidney:1304:1	24592	pancan,breast,bowel,lung,pancreas,esophagusstomach,cnsbrain	7.47251e-58	single-codon
	PIK3CA	E	726	K:53|A:2	55	2933	3:178938934_53|3:178938935_2	breast:2561:24|bladder:958:6|lung:2761:6|bowel:1782:5|cervix:239:3|prostate:1379:2|headandneck:988:2|esophagusstomach:1407:2|uterus:618:1|skin:974:1|bone:297:1|pancreas:1059:1|cnsbrain:2270:1	24592	pancan,breast,bowel,lung,bladder	1.11291e-57	single-codon
	TP53	P	151	S:36|H:13|A:11|R:9|T:8|L:1|F:1	79	8466	17:7578479_55|17:7578478_24	bowel:1782:12|headandneck:988:8|lung:2761:7|pancreas:1059:6|breast:2561:6|esophagusstomach:1407:5|ovaryfallopiantube:699:5|skin:974:5|unk:357:4|bladder:958:4|cnsbrain:2270:4|uterus:618:3|kidney:1304:2|liver:636:2|prostate:1379:2|softtissue:739:2|blood:890:1|thyroid:618:1	24592	pancan,bowel,headandneck,pancreas,breast,bladder,esophagusstomach,skin,ovaryfallopiantube	1.30026e-57	single-codon
	CDKN2A	R	58	*:61|R:1	62	769	9:21971186_61|9:21971184_1	skin:974:16|headandneck:988:14|pancreas:1059:8|esophagusstomach:1407:7|lung:2761:5|softtissue:739:2|unk:357:2|bladder:958:2|lymph:366:2|penis:6:1|ampullaofvater:23:1|ovaryfallopiantube:699:1|kidney:1304:1	24592	pancan,skin,headandneck,pancreas,esophagusstomach	2.5597e-57	single-codon
	EGFR	G	598	V:27|A:5|E:1	33	1164	7:55233043_33	cnsbrain:2270:31|lung:2761:1|esophagusstomach:1407:1	24592	cnsbrain,pancan	6.32188e-57	single-codon
	TP53	R	158	L:42|H:36|P:11|G:9|C:5|S:2|F:1	106	8466	17:7578457_90|17:7578458_16	lung:2761:55|cnsbrain:2270:14|bowel:1782:7|esophagusstomach:1407:5|bladder:958:4|uterus:618:4|prostate:1379:4|unk:357:2|headandneck:988:2|liver:636:2|biliarytract:358:1|skin:974:1|ampullaofvater:23:1|kidney:1304:1|ovaryfallopiantube:699:1|breast:2561:1|softtissue:739:1	24592	pancan,lung,cnsbrain	8.56421e-57	single-codon
	TP53	Y	236	C:40|N:5|D:5|*:5|S:2|H:2	59	8466	17:7577574_42|17:7577575_12|17:7577573_5	lung:2761:11|bowel:1782:8|breast:2561:7|headandneck:988:7|cnsbrain:2270:6|pancreas:1059:4|skin:974:3|prostate:1379:3|lymph:366:2|bladder:958:2|ovaryfallopiantube:699:2|ampullaofvater:23:1|thyroid:618:1|softtissue:739:1|esophagusstomach:1407:1	24592	pancan,lung,bowel,headandneck,breast,cnsbrain,skin,pancreas	1.29867e-56	single-codon
	B2M	M	1	L:11|I:11|V:9|T:4|R:3|K:3	41	189	15:45003745_20|15:45003747_11|15:45003746_10	lymph:366:11|lung:2761:10|headandneck:988:3|uterus:618:3|ovaryfallopiantube:699:3|skin:974:3|esophagusstomach:1407:3|bowel:1782:2|blood:890:1|pancreas:1059:1|bladder:958:1	24592	pancan,lung,lymph,skin,ovaryfallopiantube,uterus,headandneck,esophagusstomach	3.76576e-56	single-codon
	HRAS	G	12	S:14|D:14|C:4|V:3|A:2|N:1	38	275	11:534288_20|11:534289_18	headandneck:988:18|bladder:958:10|skin:974:5|softtissue:739:2|cervix:239:1|unk:357:1|breast:2561:1	24592	pancan,headandneck,bladder,skin	4.29398e-56	single-codon
	FGFR3	R	248	C:31	31	494	4:1803564_31	bladder:958:25|lung:2761:2|headandneck:988:2|blood:890:1|breast:2561:1	24592	bladder,pancan	2.24098e-52	single-codon
	TP53	C	275	F:25|Y:24|R:7|S:6|W:3|*:3|G:2	70	8466	17:7577114_55|17:7577115_9|17:7577113_6	lung:2761:15|cnsbrain:2270:8|esophagusstomach:1407:6|bowel:1782:6|ovaryfallopiantube:699:5|prostate:1379:4|headandneck:988:4|breast:2561:3|liver:636:3|skin:974:3|softtissue:739:3|blood:890:2|bladder:958:2|biliarytract:358:1|uterus:618:1|thyroid:618:1|pancreas:1059:1|kidney:1304:1|adrenalgland:291:1	24592	pancan,lung,cnsbrain,bowel,esophagusstomach,skin,headandneck,ovaryfallopiantube	9.26248e-52	single-codon
	TP53	C	135	Y:27|F:24|R:9|W:4|S:4|*:4|G:2	74	8466	17:7578526_54|17:7578527_12|17:7578525_8	esophagusstomach:1407:17|lung:2761:10|breast:2561:9|bowel:1782:9|prostate:1379:5|kidney:1304:5|pancreas:1059:4|bladder:958:3|ovaryfallopiantube:699:3|softtissue:739:2|unk:357:2|cnsbrain:2270:2|lymph:366:1|thyroid:618:1|liver:636:1	24592	pancan,esophagusstomach,breast,bowel,lung,kidney	3.52777e-50	single-codon
	TP53	P	278	S:37|L:17|A:13|T:12|R:12|H:6|F:3	100	8466	17:7577106_62|17:7577105_38	lung:2761:18|skin:974:12|bowel:1782:10|esophagusstomach:1407:9|headandneck:988:9|ovaryfallopiantube:699:8|breast:2561:7|bladder:958:7|pancreas:1059:5|cnsbrain:2270:5|prostate:1379:4|uterus:618:2|kidney:1304:1|blood:890:1|unk:357:1|softtissue:739:1	24592	pancan,bowel,lung,esophagusstomach,skin,ovaryfallopiantube,headandneck,bladder,breast	5.74723e-50	single-codon
	IDH2	R	140	Q:20|W:2|L:1	23	190	15:90631934_21|15:90631935_2	blood:890:19|pancreas:1059:1|bowel:1782:1|esophagusstomach:1407:1|headandneck:988:1	24592	blood,pancan	1.57907e-48	single-codon
	SPOP	F	133	L:32|V:19|C:8|S:5|I:3	67	332	17:47696424_29|17:47696426_25|17:47696425_13	prostate:1379:67	24592	prostate,pancan	9.29184e-48	single-codon
	PIK3CA	K	111	E:22|N:14|R:1|Q:1	38	2933	3:178916944_23|3:178916946_14|3:178916945_1	breast:2561:8|uterus:618:8|bowel:1782:6|esophagusstomach:1407:5|cnsbrain:2270:4|lung:2761:2|headandneck:988:2|biliarytract:358:1|blood:890:1|cervix:239:1	24592	pancan,breast,uterus,esophagusstomach,bowel,cnsbrain	3.93686e-47	single-codon
	TP53	S	241	F:51|C:19|Y:15|P:6|S:3|A:2|T:1	97	8466	17:7577559_84|17:7577560_9|17:7577558_4	lung:2761:16|bladder:958:10|bowel:1782:9|skin:974:8|ovaryfallopiantube:699:8|breast:2561:7|uterus:618:6|esophagusstomach:1407:5|pancreas:1059:5|cnsbrain:2270:5|kidney:1304:4|softtissue:739:3|biliarytract:358:3|prostate:1379:2|headandneck:988:2|lymph:366:1|cervix:239:1|thyroid:618:1|unk:357:1	24592	pancan,bowel,lung,uterus,ovaryfallopiantube,bladder,pancreas,breast,esophagusstomach	7.1789e-46	single-codon
	EGFR	G	719	A:18|C:7|S:5|D:3	33	1164	7:55241708_21|7:55241707_12	lung:2761:27|cnsbrain:2270:3|bladder:958:1|breast:2561:1|esophagusstomach:1407:1	24592	lung,pancan	1.15874e-45	single-codon
	TP53	M	237	I:55|K:5|V:4	64	8466	17:7577570_55|17:7577571_5|17:7577572_4	lung:2761:12|esophagusstomach:1407:11|cnsbrain:2270:9|bowel:1782:8|ovaryfallopiantube:699:5|headandneck:988:4|pancreas:1059:3|uterus:618:3|breast:2561:3|softtissue:739:2|eye:128:1|unk:357:1|bladder:958:1|prostate:1379:1	24592	pancan,esophagusstomach,cnsbrain,bowel,lung,ovaryfallopiantube,headandneck,uterus	8.54847e-45	single-codon
	FGFR2	N	549	K:21|H:3|T:1|S:1	26	458	10:123258034_21|10:123258036_3|10:123258035_2	breast:2561:9|bladder:958:6|uterus:618:6|esophagusstomach:1407:2|lung:2761:2|headandneck:988:1	24592	pancan,breast,bladder,uterus	2.63567e-44	single-codon
	RXRA	S	427	F:22|Y:4	26	140	9:137328351_26	bladder:958:23|liver:636:1|pancreas:1059:1|softtissue:739:1	14256	bladder,pancan	4.52407e-44	single-codon
	NFE2L2	R	34	G:16|Q:11|P:5|L:1|*:1	34	385	2:178098945_17|2:178098944_17	lung:2761:12|bladder:958:8|headandneck:988:7|uterus:618:2|thyroid:618:1|pancreas:1059:1|kidney:1304:1|cervix:239:1|esophagusstomach:1407:1	24592	pancan,lung,headandneck,bladder	9.73572e-44	single-codon
	TP53	V	157	F:67|G:4|L:3|V:1|D:1|A:1	77	8466	17:7578461_70|17:7578460_6|17:7578459_1	lung:2761:36|ovaryfallopiantube:699:9|headandneck:988:6|breast:2561:5|pancreas:1059:4|cnsbrain:2270:4|bladder:958:3|bowel:1782:3|liver:636:3|prostate:1379:2|biliarytract:358:1|esophagusstomach:1407:1	24592	pancan,lung,ovaryfallopiantube,headandneck,breast	1.04044e-43	single-codon
	MAP2K1	K	57	N:16|T:7|E:6	29	240	15:66727455_16|15:66727454_7|15:66727453_6	lung:2761:7|bowel:1782:5|lymph:366:4|prostate:1379:2|unk:357:2|esophagusstomach:1407:2|biliarytract:358:2|skin:974:2|cnsbrain:2270:1|breast:2561:1|headandneck:988:1	24592	pancan,lung,bowel,lymph	1.73493e-43	single-codon
	AR	L	702	H:18|L:1	19	689	X:66931463_18|X:66931464_1	prostate:1379:18|bowel:1782:1	24592	prostate,pancan	2.5684e-43	single-codon
	TP53	V	272	M:34|L:20|G:5|E:3|K:2|V:1|A:1	66	8466	17:7577124_54|17:7577123_11|17:7577122_1	lung:2761:12|pancreas:1059:8|ovaryfallopiantube:699:7|breast:2561:7|bowel:1782:6|esophagusstomach:1407:5|cnsbrain:2270:4|headandneck:988:4|skin:974:2|kidney:1304:2|bladder:958:2|prostate:1379:2|biliarytract:358:1|unk:357:1|blood:890:1|uterus:618:1|softtissue:739:1	24592	pancan,lung,pancreas,breast,bowel,ovaryfallopiantube,esophagusstomach,headandneck	9.58986e-43	single-codon
	FLT3	D	835	Y:11|E:3|H:2|V:1	17	529	13:28592642_13|13:28592640_3|13:28592641_1	blood:890:17	24592	blood,pancan	1.025e-41	single-codon
	ATM	R	337	C:31|H:9	40	1291	11:108117798_31|11:108117799_9	bowel:1782:17|skin:974:4|lung:2761:3|pancreas:1059:2|breast:2561:2|uterus:618:2|bladder:958:2|headandneck:988:2|esophagusstomach:1407:2|penis:6:1|unk:357:1|prostate:1379:1|softtissue:739:1	24592	pancan,bowel	3.53307e-41	single-codon
	TP53	K	132	N:30|R:27|E:14|M:5|T:4|Q:2|*:1	83	8466	17:7578535_36|17:7578534_30|17:7578536_17	lung:2761:17|cnsbrain:2270:9|bladder:958:8|breast:2561:8|pancreas:1059:7|ovaryfallopiantube:699:7|bowel:1782:7|esophagusstomach:1407:3|prostate:1379:3|softtissue:739:3|uterus:618:2|skin:974:2|unk:357:1|kidney:1304:1|pleura:76:1|blood:890:1|headandneck:988:1|cervix:239:1|adrenalgland:291:1	24592	pancan,lung,cnsbrain,pancreas,ovaryfallopiantube,bowel,breast	1.67436e-40	single-codon
	CIC	R	215	W:17|Q:7|R:1	25	713	19:42791757_17|19:42791758_7|19:42791759_1	cnsbrain:2270:22|bowel:1782:1|lung:2761:1|skin:974:1	24592	cnsbrain,pancan	5.5774e-40	single-codon
	PIK3CA	E	453	K:31|Q:10|D:1	42	2933	3:178928079_41|3:178928081_1	breast:2561:16|bladder:958:8|cnsbrain:2270:6|lung:2761:3|uterus:618:2|esophagusstomach:1407:2|unk:357:1|cervix:239:1|bowel:1782:1|liver:636:1|headandneck:988:1	24592	pancan,breast,cnsbrain,bladder	3.1995e-39	single-codon
	CDKN2A	W	110	*:45	45	769	9:21971028_23|9:21971029_19|9:21971027_3	headandneck:988:15|skin:974:11|lung:2761:5|cnsbrain:2270:4|pancreas:1059:3|esophagusstomach:1407:3|uterus:618:2|softtissue:739:1|bladder:958:1	24592	pancan,headandneck,skin,cnsbrain	5.20425e-39	single-codon
	TP53	R	280	K:36|T:34|G:17|I:12|S:8|*:2	109	8466	17:7577099_82|17:7577100_19|17:7577098_8	bladder:958:33|lung:2761:20|breast:2561:10|headandneck:988:9|skin:974:5|cnsbrain:2270:5|esophagusstomach:1407:4|uterus:618:3|pancreas:1059:3|ovaryfallopiantube:699:3|liver:636:2|thyroid:618:2|softtissue:739:2|unk:357:2|bowel:1782:2|prostate:1379:1|biliarytract:358:1|blood:890:1|cervix:239:1	24592	pancan,bladder,lung,headandneck,breast	8.52039e-39	single-codon
	GTF2I	N	440	S:19	19	162	7:74148279_19	esophagusstomach:1407:9|softtissue:739:4|bladder:958:2|prostate:1379:1|testis:217:1|lymph:366:1|biliarytract:358:1	14256	pancan,esophagusstomach,softtissue,bladder	7.49958e-38	single-codon
	NFE2L2	E	79	Q:17|K:11|V:2|*:2|G:1|D:1	34	385	2:178098810_30|2:178098809_3|2:178098808_1	lung:2761:11|headandneck:988:10|bladder:958:4|esophagusstomach:1407:4|liver:636:2|cervix:239:2|cnsbrain:2270:1	24592	pancan,lung,headandneck,esophagusstomach	7.4686e-37	single-codon
	ERBB2	R	678	Q:31|W:1	32	726	17:37879658_31|17:37879657_1	esophagusstomach:1407:9|bowel:1782:9|bladder:958:6|uterus:618:4|breast:2561:2|unk:357:1|prostate:1379:1	24592	pancan,esophagusstomach,bowel,bladder,uterus	9.16633e-37	single-codon
	TP53	S	215	I:20|R:13|G:8|N:7|T:1|C:1	50	8466	17:7578205_28|17:7578206_12|17:7578204_10	lung:2761:14|bowel:1782:6|pancreas:1059:5|esophagusstomach:1407:4|prostate:1379:4|liver:636:3|cnsbrain:2270:2|uterus:618:2|breast:2561:2|ovaryfallopiantube:699:2|headandneck:988:1|thyroid:618:1|bladder:958:1|kidney:1304:1|blood:890:1|softtissue:739:1	24592	pancan,lung,bowel,pancreas,prostate,esophagusstomach	1.43787e-36	single-codon
	MET	splice	X1010_splice	splice:19	19	591	7:116412044_11|7:116412045_8	lung:2761:18|cnsbrain:2270:1	24592	lung,pancan	3.32303e-36	single-codon
	BRAF	N	581	S:13|I:3|T:2|Y:1|H:1|D:1	21	1450	7:140453193_18|7:140453987_3	bowel:1782:5|skin:974:5|lung:2761:5|ovaryfallopiantube:699:2|blood:890:1|esophagusstomach:1407:1|unk:357:1|kidney:1304:1	24592	pancan,skin,lung,bowel,ovaryfallopiantube	3.87361e-36	single-codon
	KIT	N	822	K:14|Y:6|I:1	21	592	4:55599340_14|4:55599338_6|4:55599339_1	testis:217:10|softtissue:739:5|skin:974:3|bowel:1782:2|unk:357:1	24592	pancan,testis,softtissue,skin	2.30956e-35	single-codon
	RHOA	G	17	V:16|E:15|A:5	36	262	3:49412973_36	lymph:366:14|breast:2561:10|bladder:958:4|unk:357:2|bowel:1782:2|esophagusstomach:1407:2|skin:974:1|ovaryfallopiantube:699:1	24592	pancan,lymph,breast	4.09456e-35	single-codon
	CDK4	R	24	L:10|H:7|C:4|S:2	23	114	12:58145430_17|12:58145431_6	skin:974:11|lung:2761:10|blood:890:1|bladder:958:1	24592	pancan,skin,lung	5.35321e-35	single-codon
	BRAF	G	466	V:17|E:14|A:3	34	1450	7:140481411_34	lung:2761:17|blood:890:4|skin:974:4|bowel:1782:3|unk:357:2|prostate:1379:1|cnsbrain:2270:1|bladder:958:1|headandneck:988:1	24592	pancan,lung,blood,bowel	6.72195e-35	single-codon
	AR	T	878	A:14|S:1	15	689	X:66943552_14|X:66943553_1	prostate:1379:15	24592	prostate,pancan	8.20731e-35	single-codon
	PTEN	R	233	*:45|Q:1	46	1101	10:89717672_45|10:89717673_1	uterus:618:16|cnsbrain:2270:8|bowel:1782:7|esophagusstomach:1407:3|lymph:366:2|prostate:1379:2|breast:2561:2|kidney:1304:1|lung:2761:1|ovaryfallopiantube:699:1|thyroid:618:1|bladder:958:1|cervix:239:1	24592	pancan,uterus,bowel	1.4203e-34	single-codon
	TP53	N	239	S:19|D:18|K:2|T:1|H:1	41	8466	17:7577565_20|17:7577566_19|17:7577564_2	uterus:618:7|lung:2761:7|breast:2561:6|prostate:1379:3|kidney:1304:3|headandneck:988:3|lymph:366:2|bowel:1782:2|pancreas:1059:2|adrenalgland:291:1|cnsbrain:2270:1|bladder:958:1|ovaryfallopiantube:699:1|liver:636:1|esophagusstomach:1407:1	24592	pancan,uterus,breast,lung,headandneck	3.8373e-34	single-codon
	AR	H	875	Y:16	16	689	X:66943543_16	prostate:1379:16	24592	prostate,pancan	7.63404e-34	single-codon
	POLE	P	286	R:23|T:1|S:1|L:1|H:1	27	861	12:133253184_25|12:133253185_2	uterus:618:11|bowel:1782:9|breast:2561:2|bladder:958:2|prostate:1379:1|pancreas:1059:1|esophagusstomach:1407:1	24592	pancan,uterus,bowel	1.11888e-33	single-codon
	CREBBP	R	1446	C:14|H:10|L:6|S:1|P:1|G:1	33	1199	16:3788618_16|16:3788617_16|16:3788615_1	lymph:366:5|headandneck:988:4|bladder:958:4|bowel:1782:4|cnsbrain:2270:3|esophagusstomach:1407:3|lung:2761:3|liver:636:2|cervix:239:2|skin:974:2|pleura:76:1	24592	pancan,lymph,headandneck,bladder	1.12282e-33	single-codon
	TP53	C	242	F:27|Y:12|S:9|W:4|G:3|R:2|C:1|*:1	59	8466	17:7577556_43|17:7577557_9|17:7577555_6|17:7577554_1	lung:2761:17|headandneck:988:6|bowel:1782:6|esophagusstomach:1407:5|breast:2561:5|uterus:618:4|liver:636:3|pancreas:1059:3|blood:890:2|cnsbrain:2270:2|bladder:958:2|prostate:1379:1|kidney:1304:1|unk:357:1|softtissue:739:1	24592	pancan,lung,headandneck,bowel,uterus,breast	1.17968e-33	single-codon
	CD79B	Y	197	H:5|S:2|N:2|F:2|D:2|C:2|R:1	16	118	17:62006799_9|17:62006798_7	lymph:366:16	24592	lymph,pancan	1.25151e-33	single-codon
	NFE2L2	E	82	D:13|G:3|A:3|Q:2	21	385	2:178098799_13|2:178098800_6|2:178098801_2	uterus:618:7|liver:636:4|lung:2761:2|kidney:1304:2|esophagusstomach:1407:2|bowel:1782:1|cervix:239:1|bladder:958:1|biliarytract:358:1	24592	pancan,uterus,liver	4.89628e-33	single-codon
	PIK3CA	V	344	G:13|M:11|A:2	26	2933	3:178921549_15|3:178921548_11	uterus:618:6|bowel:1782:6|cnsbrain:2270:3|skin:974:2|breast:2561:2|lymph:366:1|softtissue:739:1|unk:357:1|prostate:1379:1|esophagusstomach:1407:1|headandneck:988:1|cervix:239:1	24592	pancan,bowel,uterus	5.8497e-33	single-codon
	TP53	splice	X261_splice	splice:51	51	8466	17:7577498_27|17:7577156_14|17:7577157_6|17:7577497_3|17:7577496_1	lung:2761:13|breast:2561:7|esophagusstomach:1407:6|ovaryfallopiantube:699:5|bowel:1782:4|headandneck:988:4|bladder:958:2|cnsbrain:2270:2|liver:636:1|unk:357:1|pancreas:1059:1|lymph:366:1|prostate:1379:1|softtissue:739:1|kidney:1304:1|uterus:618:1	24592	pancan,lung,breast,esophagusstomach,ovaryfallopiantube,bowel,headandneck	6.79063e-33	single-codon
	MED12	G	44	S:8|D:6|C:5|A:4|V:2	25	834	X:70339253_13|X:70339254_12	uterus:618:8|bowel:1782:4|breast:2561:2|softtissue:739:2|cnsbrain:2270:2|biliarytract:358:2|bladder:958:2|blood:890:1|prostate:1379:1|lymph:366:1	24592	pancan,uterus,bowel	1.20697e-32	single-codon
	EGFR	L	861	Q:21	21	1164	7:55259524_21	lung:2761:19|bowel:1782:2	24592	lung,pancan	7.90213e-32	single-codon
	ERBB4	S	1289	A:12	12	1157	2:212248402_12	bladder:958:12	24592	bladder,pancan	8.08818e-32	single-codon
	TP53	G	244	D:21|C:19|S:15|V:6|R:1|G:1|F:1|A:1	65	8466	17:7577551_35|17:7577550_29|17:7577549_1	lung:2761:17|cnsbrain:2270:8|esophagusstomach:1407:7|ovaryfallopiantube:699:7|bowel:1782:5|lymph:366:3|bladder:958:3|uterus:618:3|breast:2561:2|headandneck:988:2|softtissue:739:2|liver:636:1|biliarytract:358:1|cervix:239:1|kidney:1304:1|unk:357:1|pancreas:1059:1	24592	pancan,lung,ovaryfallopiantube,cnsbrain,esophagusstomach	1.00027e-31	single-codon
	PIK3CA	R	93	Q:18|W:12|L:1	31	2933	3:178916891_19|3:178916890_12	uterus:618:11|esophagusstomach:1407:5|bowel:1782:4|bladder:958:3|breast:2561:3|cervix:239:2|cnsbrain:2270:2|lung:2761:1	24592	pancan,uterus,esophagusstomach	1.87725e-31	single-codon
	MED12	L	1224	F:16|V:2	18	834	X:70349258_17|X:70349257_1	prostate:1379:14|breast:2561:1|pancreas:1059:1|lung:2761:1|esophagusstomach:1407:1	24592	prostate,pancan	1.98093e-31	single-codon
	ERCC2	N	238	S:16	16	355	19:45867687_16	bladder:958:14|kidney:1304:1|breast:2561:1	24592	bladder,pancan	2.05951e-31	single-codon
	FOXL2	C	134	W:12	12	141	3:138665163_12	ovaryfallopiantube:699:12	24592	ovaryfallopiantube,pancan	4.37607e-31	single-codon
	STK19	D	89	N:16|D:2	18	86	6:31940123_16|6:31940125_2	skin:974:18	14256	skin,pancan	7.07803e-31	single-codon
	TP53	V	274	F:14|A:12|G:8|D:7|L:5	46	8466	17:7577117_27|17:7577118_19	lung:2761:11|breast:2561:8|pancreas:1059:4|bowel:1782:4|esophagusstomach:1407:4|liver:636:3|cnsbrain:2270:3|prostate:1379:3|bladder:958:2|ovaryfallopiantube:699:2|skin:974:1|uterus:618:1	24592	pancan,breast,lung,pancreas,bowel	9.09067e-31	single-codon
	PIK3CA	R	108	H:25|L:3|S:1	29	2933	3:178916936_28|3:178916935_1	bowel:1782:8|uterus:618:6|lung:2761:3|lymph:366:2|biliarytract:358:2|bone:297:1|skin:974:1|ovaryfallopiantube:699:1|bladder:958:1|cnsbrain:2270:1|breast:2561:1|esophagusstomach:1407:1|prostate:1379:1	24592	pancan,bowel,uterus	2.18074e-30	single-codon
	MAPK1	E	322	K:24|A:1|*:1	26	117	22:22127164_25|22:22127163_1	headandneck:988:12|cervix:239:7|bladder:958:4|skin:974:1|lung:2761:1|lymph:366:1	24592	pancan,headandneck,cervix,bladder	2.78212e-30	single-codon
	XPO1	E	571	K:25|V:1|A:1	27	317	2:61719472_25|2:61719471_2	blood:890:7|lymph:366:7|breast:2561:4|bowel:1782:3|uterus:618:3|prostate:1379:2|bladder:958:1	24592	pancan,lymph,blood,breast	3.18647e-30	single-codon
	RHOA	Y	42	C:14|S:3|I:1|F:1	19	262	3:49412898_19	esophagusstomach:1407:16|lymph:366:1|headandneck:988:1|ampullaofvater:23:1	24592	esophagusstomach,pancan	8.62658e-30	single-codon
	NFE2L2	D	29	H:19|Y:7|N:2|G:2	30	385	2:178098960_28|2:178098959_2	lung:2761:10|headandneck:988:6|bladder:958:5|kidney:1304:3|cervix:239:3|bowel:1782:1|uterus:618:1|esophagusstomach:1407:1	24592	pancan,lung,headandneck,kidney	1.19589e-29	single-codon
	ERBB2	V	777	L:17|M:3	20	726	17:37881000_20	breast:2561:6|bowel:1782:5|esophagusstomach:1407:5|bladder:958:2|ampullaofvater:23:1|headandneck:988:1	24592	pancan,breast,bowel,esophagusstomach	2.19804e-29	single-codon
	TP53	splice	X331_splice	splice:49	49	8466	17:7576852_42|17:7576851_7	breast:2561:9|bowel:1782:9|lung:2761:8|ovaryfallopiantube:699:7|bladder:958:3|pancreas:1059:3|headandneck:988:2|blood:890:1|unk:357:1|skin:974:1|biliarytract:358:1|lymph:366:1|liver:636:1|softtissue:739:1|prostate:1379:1	24592	pancan,bowel,breast,ovaryfallopiantube,lung	4.86591e-29	single-codon
	KIT	D	816	V:11|Y:5|H:5|A:1	22	592	4:55599321_12|4:55599320_10	testis:217:13|blood:890:5|unk:357:4	24592	testis,pancan,blood	1.55789e-28	single-codon
	KRAS	G	60	G:19|V:2|D:2|S:1	24	2885	12:25380278_12|12:25380277_7|12:25380279_4|12:25380280_1	bowel:1782:9|pancreas:1059:2|bladder:958:2|skin:974:2|unk:357:2|esophagusstomach:1407:2|thyroid:618:2|lung:2761:1|blood:890:1|biliarytract:358:1	24592	pancan,bowel	2.36548e-28	single-codon
	ALK	R	1275	Q:16|L:1|*:1	18	896	2:29432664_17|2:29432665_1	cnsbrain:2270:15|prostate:1379:1|bowel:1782:1|breast:2561:1	24592	cnsbrain,pancan	6.65372e-28	single-codon
	CTNNB1	K	335	I:16|T:3	19	800	3:41268766_19	liver:636:11|bowel:1782:3|skin:974:1|penis:6:1|biliarytract:358:1|prostate:1379:1|esophagusstomach:1407:1	24592	pancan,liver	1.26036e-27	single-codon
	ALK	F	1174	L:11|C:2|V:1	14	896	2:29443695_9|2:29443697_3|2:29443696_2	cnsbrain:2270:12|lung:2761:1|kidney:1304:1	24592	cnsbrain,pancan	1.96742e-27	single-codon
	ERBB2	V	842	I:26	26	726	17:37881332_26	bowel:1782:8|uterus:618:7|pancreas:1059:3|esophagusstomach:1407:3|bladder:958:2|prostate:1379:1|breast:2561:1|biliarytract:358:1	24592	pancan,uterus,bowel,pancreas	2.902e-27	single-codon
	MAP2K1	P	124	S:15|L:6|R:1|Q:1|P:1|M:1	25	240	15:66729162_16|15:66729163_8|15:66729164_1	skin:974:20|unk:357:2|bladder:958:1|uterus:618:1|bowel:1782:1	24592	skin,pancan	5.99242e-27	single-codon
	SMAD4	D	537	G:10|H:6|V:5|Y:4|E:4|A:1	30	735	18:48604788_16|18:48604787_10|18:48604789_4	bowel:1782:19|pancreas:1059:5|lung:2761:3|esophagusstomach:1407:2|ovaryfallopiantube:699:1	24592	pancan,bowel,pancreas	6.16661e-27	single-codon
	TP53	E	285	K:68|*:15|V:9|E:4|Q:3	99	8466	17:7577085_85|17:7577084_9|17:7577083_4|17:7577082_1	bladder:958:33|lung:2761:15|breast:2561:10|esophagusstomach:1407:8|skin:974:6|headandneck:988:5|bowel:1782:5|unk:357:4|biliarytract:358:3|prostate:1379:2|cervix:239:2|bone:297:1|thyroid:618:1|lymph:366:1|pleura:76:1|uterus:618:1|adrenalgland:291:1	24592	pancan,bladder,lung,esophagusstomach	1.4243e-26	single-codon
	TP53	R	306	*:85|Q:1	86	8466	17:7577022_85|17:7577021_1	esophagusstomach:1407:20|bowel:1782:17|breast:2561:10|headandneck:988:7|pancreas:1059:6|cnsbrain:2270:6|ovaryfallopiantube:699:5|liver:636:3|lung:2761:3|bladder:958:2|biliarytract:358:2|unk:357:2|softtissue:739:1|kidney:1304:1|uterus:618:1	24592	pancan,esophagusstomach,breast,bowel,headandneck	1.86197e-26	single-codon
	TP53	H	214	R:35|Q:2|L:2|P:1	40	8466	17:7578208_38|17:7578207_1|17:7578205_1	lung:2761:10|pancreas:1059:6|esophagusstomach:1407:4|cnsbrain:2270:3|bladder:958:3|liver:636:2|thyroid:618:2|softtissue:739:2|ovaryfallopiantube:699:2|bowel:1782:2|blood:890:1|lymph:366:1|uterus:618:1|kidney:1304:1	24592	pancan,lung,pancreas,esophagusstomach,bladder	3.13071e-26	single-codon
	SMARCA4	T	910	M:26|T:1|R:1|A:1	29	1088	19:11132513_27|19:11132514_1|19:11132512_1	esophagusstomach:1407:6|cnsbrain:2270:5|pancreas:1059:3|bowel:1782:2|bone:297:2|uterus:618:2|lung:2761:2|prostate:1379:1|breast:2561:1|unk:357:1|bladder:958:1|eye:128:1|thymus:162:1|kidney:1304:1	24592	pancan,esophagusstomach,cnsbrain,pancreas	3.37629e-26	single-codon
	PIK3CA	G	106	V:14|R:6|S:1|C:1	22	2933	3:178916930_14|3:178916929_8	bladder:958:4|uterus:618:4|cnsbrain:2270:3|breast:2561:2|prostate:1379:2|lung:2761:2|bowel:1782:2|skin:974:1|cervix:239:1|kidney:1304:1	24592	pancan,bladder,uterus	6.8726e-26	single-codon
	HIST1H3B	K	28	M:11|E:1	12	227	6:26032206_11|6:26032207_1	cnsbrain:2270:11|headandneck:988:1	24592	cnsbrain,pancan	1.52284e-25	single-codon
	POLE	V	411	L:18	18	861	12:133250289_18	uterus:618:10|bowel:1782:4|penis:6:1|unk:357:1|cnsbrain:2270:1|esophagusstomach:1407:1	24592	pancan,uterus,bowel	2.55791e-25	single-codon
	CDH1	Q	23	*:19	19	556	16:68772218_19	breast:2561:16|esophagusstomach:1407:2|bladder:958:1	24592	breast,pancan	5.17732e-25	single-codon
	FGFR1	N	577	K:17|D:2	19	331	8:38274849_17|8:38274851_2	cnsbrain:2270:11|softtissue:739:3|adrenalgland:291:2|cervix:239:1|breast:2561:1|esophagusstomach:1407:1	24592	pancan,cnsbrain,softtissue,adrenalgland	5.2784e-25	single-codon
	TP53	E	286	K:41|*:14|Q:7|G:6|V:3|A:2	73	8466	17:7577082_62|17:7577081_11	lung:2761:12|skin:974:10|breast:2561:9|esophagusstomach:1407:6|bladder:958:6|bowel:1782:5|softtissue:739:4|pancreas:1059:4|headandneck:988:4|cnsbrain:2270:3|lymph:366:2|liver:636:2|uterus:618:1|prostate:1379:1|unk:357:1|biliarytract:358:1|ovaryfallopiantube:699:1|blood:890:1	24592	pancan,breast,lung,esophagusstomach,bowel,skin	7.08381e-25	single-codon
	RAF1	S	257	L:24|W:1	25	233	3:12645699_25	bowel:1782:11|lung:2761:5|esophagusstomach:1407:3|skin:974:3|bladder:958:1|vulvavagina:16:1|unk:357:1	24592	pancan,bowel,lung	3.23333e-24	single-codon
	FGFR2	S	252	W:18|S:2|L:2	22	458	10:123279677_20|10:123279676_2	uterus:618:16|esophagusstomach:1407:2|bladder:958:1|ovaryfallopiantube:699:1|unk:357:1|breast:2561:1	24592	uterus,pancan	4.1741e-24	single-codon
	KRAS	K	117	N:17|R:1	18	2885	12:25378647_17|12:25378648_1	bowel:1782:9|blood:890:3|esophagusstomach:1407:2|liver:636:1|unk:357:1|softtissue:739:1|skin:974:1	24592	pancan,bowel,blood	5.40951e-24	single-codon
	EGFR	R	108	K:17|G:2	19	1164	7:55211080_17|7:55211079_2	cnsbrain:2270:18|esophagusstomach:1407:1	24592	cnsbrain,pancan	5.53217e-24	single-codon
	PIK3R1	N	564	D:17	17	396	5:67591097_17	cnsbrain:2270:6|bowel:1782:5|uterus:618:2|softtissue:739:1|lung:2761:1|esophagusstomach:1407:1|skin:974:1	24592	pancan,cnsbrain,bowel	1.08334e-23	single-codon
	NFE2L2	G	31	A:9|E:7|R:4|V:1	21	385	2:178098953_17|2:178098954_4	lung:2761:8|esophagusstomach:1407:4|breast:2561:2|headandneck:988:2|bladder:958:2|liver:636:1|bowel:1782:1|uterus:618:1	24592	pancan,lung,esophagusstomach	2.4325e-23	single-codon
	NFE2L2	G	81	S:6|V:4|R:3|D:3|C:2|A:1	19	385	2:178098804_11|2:178098803_8	lung:2761:5|kidney:1304:4|esophagusstomach:1407:3|liver:636:2|uterus:618:2|breast:2561:1|headandneck:988:1|bladder:958:1	24592	pancan,kidney,lung,esophagusstomach	2.60359e-23	single-codon
	TCEB1	Y	79	C:6|S:1|N:1|F:1|*:1	10	42	8:74858968_8|8:74858969_1|8:74858967_1	kidney:1304:10	22029	kidney,pancan	2.66762e-23	single-codon
	MAP2K1	F	53	L:12|V:2|C:2|I:1	17	240	15:66727441_12|15:66727443_3|15:66727442_2	esophagusstomach:1407:3|bowel:1782:3|bladder:958:3|lung:2761:2|softtissue:739:1|blood:890:1|kidney:1304:1|skin:974:1|lymph:366:1|thymus:162:1	24592	pancan,bladder,bowel	7.28455e-23	single-codon
	ERBB3	E	928	G:15|K:2	17	696	12:56492633_15|12:56492632_2	breast:2561:8|bladder:958:2|bowel:1782:2|biliarytract:358:1|esophagusstomach:1407:1|kidney:1304:1|lung:2761:1|uterus:618:1	24592	pancan,breast	8.04884e-23	single-codon
	ERBB3	D	297	Y:18|V:1|N:1|H:1|A:1	22	696	12:56482341_20|12:56482342_2	bladder:958:6|esophagusstomach:1407:5|uterus:618:4|breast:2561:3|bowel:1782:2|biliarytract:358:1|lung:2761:1	24592	pancan,esophagusstomach,bladder,uterus	8.04884e-23	single-codon
	TP53	splice	X225_splice	splice:46	46	8466	17:7577609_24|17:7577610_22	lung:2761:10|breast:2561:7|headandneck:988:5|skin:974:3|uterus:618:3|esophagusstomach:1407:3|kidney:1304:3|ovaryfallopiantube:699:3|cnsbrain:2270:3|bowel:1782:2|liver:636:1|prostate:1379:1|unk:357:1|blood:890:1	24592	pancan,breast,lung,headandneck	9.76065e-23	single-codon
	TP53	C	141	Y:25|W:9|R:5|G:4|*:2|S:1|F:1	47	8466	17:7578508_27|17:7578507_11|17:7578509_9	breast:2561:9|bowel:1782:5|pancreas:1059:4|prostate:1379:4|lung:2761:4|uterus:618:3|cnsbrain:2270:3|blood:890:2|esophagusstomach:1407:2|bladder:958:2|biliarytract:358:2|ovaryfallopiantube:699:2|headandneck:988:2|liver:636:1|softtissue:739:1|kidney:1304:1	24592	pancan,breast,bowel	1.81124e-22	single-codon
	TP53	D	281	N:14|E:14|Y:13|V:9|H:9|G:4|D:4|P:1|A:1	69	8466	17:7577097_36|17:7577096_15|17:7577095_15|17:7577094_3	lung:2761:16|cnsbrain:2270:10|breast:2561:7|bladder:958:6|skin:974:5|uterus:618:5|ovaryfallopiantube:699:4|pancreas:1059:3|blood:890:2|kidney:1304:2|softtissue:739:2|esophagusstomach:1407:1|liver:636:1|biliarytract:358:1|bowel:1782:1|unk:357:1|bone:297:1|headandneck:988:1	24592	pancan,lung,cnsbrain	3.56197e-22	single-codon
	EP300	D	1399	N:20|Y:2|E:1	23	871	22:41565529_22|22:41565531_1	headandneck:988:6|cervix:239:5|esophagusstomach:1407:3|lung:2761:3|bladder:958:2|cnsbrain:2270:1|bowel:1782:1|uterus:618:1|lymph:366:1	24592	pancan,headandneck,cervix,esophagusstomach	6.8835e-22	single-codon
	TP53	V	216	M:24|L:9|G:5|E:4	42	8466	17:7578203_33|17:7578202_9	lung:2761:7|breast:2561:6|cnsbrain:2270:5|ovaryfallopiantube:699:4|pancreas:1059:3|prostate:1379:3|skin:974:2|esophagusstomach:1407:2|uterus:618:2|headandneck:988:2|lymph:366:2|softtissue:739:1|liver:636:1|bowel:1782:1|biliarytract:358:1	24592	pancan,breast,cnsbrain	7.05793e-22	single-codon
	NUP93	Q	15	*:15|K:1	16	261	16:56782202_16	bladder:958:5|thyroid:618:4|lung:2761:2|breast:2561:2|ovaryfallopiantube:699:1|cervix:239:1|uterus:618:1	22029	pancan,bladder,thyroid	7.38256e-22	single-codon
	SMAD4	G	386	D:9|V:6|S:3|R:2|C:1|A:1	22	735	18:48593406_16|18:48593405_6	esophagusstomach:1407:8|bowel:1782:6|pancreas:1059:5|breast:2561:1|prostate:1379:1|lung:2761:1	24592	pancan,esophagusstomach,bowel,pancreas	8.21942e-22	single-codon
	TP53	splice	X125_splice	splice:43	43	8466	17:7579311_34|17:7579310_9	esophagusstomach:1407:7|lung:2761:7|skin:974:4|headandneck:988:4|breast:2561:4|cnsbrain:2270:4|softtissue:739:2|pancreas:1059:2|ovaryfallopiantube:699:2|unk:357:1|uterus:618:1|bone:297:1|bowel:1782:1|biliarytract:358:1|vulvavagina:16:1|adrenalgland:291:1	24592	pancan,esophagusstomach,lung,headandneck	8.5038e-22	single-codon
	TP53	R	337	C:36|L:20|S:4|H:4|P:3|G:1	68	8466	17:7574018_41|17:7574017_27	lung:2761:17|bowel:1782:11|breast:2561:6|headandneck:988:5|pancreas:1059:3|esophagusstomach:1407:3|unk:357:3|adrenalgland:291:3|kidney:1304:2|liver:636:2|uterus:618:2|prostate:1379:2|cnsbrain:2270:2|skin:974:1|biliarytract:358:1|ovaryfallopiantube:699:1|blood:890:1|cervix:239:1|softtissue:739:1|bladder:958:1	24592	pancan,lung,breast	8.69772e-22	single-codon
	EGFR	S	768	I:14|T:1	15	1164	7:55249005_15	lung:2761:14|bowel:1782:1	24592	lung,pancan	1.19234e-21	single-codon
	EIF1AX	splice	X113_splice	splice:11	11	127	X:20148727_5|X:20148726_4|X:20148725_2	thyroid:618:11	24592	thyroid,pancan	1.63797e-21	single-codon
	PTPN11	A	72	V:6|T:6|D:3|G:2|S:1	18	298	12:112888199_11|12:112888198_7	cnsbrain:2270:14|blood:890:3|breast:2561:1	24592	cnsbrain,pancan,blood	3.59179e-21	single-codon
	MYCN	P	44	L:19|F:1	20	229	2:16082317_19|2:16082316_1	cnsbrain:2270:8|skin:974:4|uterus:618:4|pancreas:1059:3|headandneck:988:1	24592	pancan,cnsbrain,uterus,pancreas	7.36092e-21	single-codon
	SDHAF2	splice	X87_splice	splice:9	9	67	11:61205474_9	kidney:1304:9	24592	kidney,pancan	7.98189e-21	single-codon
	PDGFRA	D	842	V:9|I:1|H:1|D:1	12	690	4:55152093_9|4:55152092_2|4:55152094_1	softtissue:739:8|cnsbrain:2270:3|lung:2761:1	24592	softtissue,pancan,cnsbrain	1.11042e-20	single-codon
	TP53	Y	126	C:11|D:8|*:7|S:3|N:2|H:2	33	8466	17:7578553_14|17:7578554_12|17:7578552_7	pancreas:1059:5|breast:2561:5|esophagusstomach:1407:4|headandneck:988:4|bowel:1782:4|lung:2761:3|prostate:1379:3|liver:636:2|lymph:366:1|cnsbrain:2270:1|softtissue:739:1	24592	pancan,pancreas,breast,headandneck,bowel	1.53812e-20	single-codon
	NFE2L2	T	80	R:5|K:4|A:3|P:2|I:1	15	385	2:178098806_10|2:178098807_5	lung:2761:3|uterus:618:3|bladder:958:2|kidney:1304:2|esophagusstomach:1407:1|liver:636:1|ovaryfallopiantube:699:1|thyroid:618:1|headandneck:988:1	24592	pancan,uterus,lung	2.59469e-20	single-codon
	PIK3CA	G	1049	R:16|A:1	17	2933	3:178952090_16|3:178952091_1	breast:2561:7|uterus:618:3|bowel:1782:3|lung:2761:1|ovaryfallopiantube:699:1|kidney:1304:1|bladder:958:1	24592	pancan,breast,uterus,bowel	2.7633e-20	single-codon
	ESR1	L	536	H:6|P:3|R:2|L:2|Q:1	14	427	6:152419920_12|6:152419921_2	breast:2561:12|uterus:618:2	24592	breast,pancan,uterus	2.96527e-20	single-codon
	SF3B1	E	902	K:13|Q:3|G:1	17	638	2:198265453_16|2:198265452_1	bladder:958:15|skin:974:2	24592	bladder,pancan	3.68986e-20	single-codon
	TP53	A	159	V:27|P:23|D:1|A:1	52	8466	17:7578454_28|17:7578455_23|17:7578453_1	lung:2761:20|bladder:958:5|skin:974:4|bowel:1782:4|headandneck:988:3|cnsbrain:2270:3|pancreas:1059:2|breast:2561:2|prostate:1379:2|ovaryfallopiantube:699:2|esophagusstomach:1407:1|liver:636:1|blood:890:1|bone:297:1|kidney:1304:1	24592	pancan,lung,bladder	4.57179e-20	single-codon
	TP53	I	255	F:12|N:7|T:6|S:6|I:1	32	8466	17:7577517_18|17:7577518_12|17:7577516_2	breast:2561:6|pancreas:1059:3|esophagusstomach:1407:3|lung:2761:3|cnsbrain:2270:3|bowel:1782:3|prostate:1379:3|uterus:618:2|headandneck:988:2|blood:890:1|ovaryfallopiantube:699:1|biliarytract:358:1|liver:636:1	24592	pancan,breast	6.0548e-20	single-codon
	PPP6C	R	264	C:19	19	144	9:127912080_19	skin:974:17|unk:357:1|lung:2761:1	22029	skin,pancan	1.18596e-19	single-codon
	PIK3CA	Y	1021	C:11|H:3	14	2933	3:178952007_11|3:178952006_3	bowel:1782:4|uterus:618:4|breast:2561:2|esophagusstomach:1407:2|skin:974:1|prostate:1379:1	24592	pancan,uterus,bowel	1.32809e-19	single-codon
	KIT	K	642	E:12|Q:1|N:1	14	592	4:55594221_13|4:55594223_1	skin:974:8|testis:217:2|softtissue:739:2|bowel:1782:1|esophagusstomach:1407:1	24592	pancan,skin,testis,softtissue	1.33539e-19	single-codon
	TP53	L	194	R:30|F:12|H:4|P:3	49	8466	17:7578268_37|17:7578269_12	lung:2761:11|breast:2561:9|pancreas:1059:5|bladder:958:4|bowel:1782:3|headandneck:988:3|ovaryfallopiantube:699:3|esophagusstomach:1407:2|cnsbrain:2270:2|liver:636:1|skin:974:1|lymph:366:1|adrenalgland:291:1|softtissue:739:1|thymus:162:1|cervix:239:1	24592	pancan,breast,lung,pancreas	1.50602e-19	single-codon
	PIK3R1	G	376	R:18	18	396	5:67589138_18	cnsbrain:2270:12|esophagusstomach:1407:2|lung:2761:1|bowel:1782:1|skin:974:1|uterus:618:1	24592	cnsbrain,pancan	1.67548e-19	single-codon
	TP53	splice	X224_splice	splice:39	39	8466	17:7578176_31|17:7578175_8	lung:2761:8|esophagusstomach:1407:6|headandneck:988:5|bowel:1782:3|ovaryfallopiantube:699:3|pancreas:1059:2|liver:636:2|softtissue:739:2|breast:2561:1|prostate:1379:1|unk:357:1|thyroid:618:1|blood:890:1|skin:974:1|cnsbrain:2270:1|kidney:1304:1	24592	pancan,esophagusstomach,lung,headandneck	2.23758e-19	single-codon
	PIK3CA	R	38	H:11|C:8|S:1|L:1|G:1	22	2933	3:178916726_12|3:178916725_10	bowel:1782:7|uterus:618:7|cnsbrain:2270:3|esophagusstomach:1407:2|prostate:1379:1|lung:2761:1|cervix:239:1	24592	pancan,uterus,bowel	3.1646e-19	single-codon
	MET	D	1010	N:6|H:6|Y:2	14	591	7:116412043_14	lung:2761:13|unk:357:1	24592	lung,pancan	3.4267e-19	single-codon
	ARID1A	R	1989	*:28|Q:1	29	1439	1:27106354_28|1:27106355_1	uterus:618:14|bowel:1782:7|lymph:366:2|headandneck:988:1|unk:357:1|pancreas:1059:1|bladder:958:1|cervix:239:1|esophagusstomach:1407:1	24592	pancan,uterus,bowel	3.62856e-19	single-codon
	SPOP	F	102	C:12|V:7|S:2|L:2|I:1	24	332	17:47696643_14|17:47696644_8|17:47696642_2	prostate:1379:22|bladder:958:1|lymph:366:1	24592	prostate,pancan	1.62286e-18	single-codon
	PIK3CA	N	1044	K:12|Y:2	14	2933	3:178952077_12|3:178952075_2	breast:2561:5|unk:357:2|prostate:1379:2|uterus:618:2|kidney:1304:2|cnsbrain:2270:1	24592	pancan,breast	1.63186e-18	single-codon
	MAX	R	60	Q:21|W:1|R:1	23	112	14:65544747_20|14:65544748_1|14:65544746_1|14:65544745_1	bowel:1782:6|cnsbrain:2270:6|uterus:618:3|lung:2761:2|skin:974:2|unk:357:1|pancreas:1059:1|blood:890:1|esophagusstomach:1407:1	24592	pancan,cnsbrain,bowel	1.63574e-18	single-codon
	PPP2R1A	S	256	F:11|Y:3	14	358	19:52716323_14	uterus:618:11|bladder:958:1|breast:2561:1|ovaryfallopiantube:699:1	24592	uterus,pancan	3.21769e-18	single-codon
	PIK3CA	E	81	K:24|*:1	25	2933	3:178916854_25	breast:2561:7|uterus:618:4|bowel:1782:4|lung:2761:2|cnsbrain:2270:2|headandneck:988:2|thyroid:618:1|skin:974:1|kidney:1304:1|cervix:239:1	24592	pancan,breast	4.01644e-18	single-codon
	FGFR2	C	382	R:14|Y:1	15	458	10:123274774_14|10:123274773_1	uterus:618:7|esophagusstomach:1407:3|biliarytract:358:2|testis:217:1|skin:974:1|cervix:239:1	24592	pancan,uterus,esophagusstomach,biliarytract	4.77301e-18	single-codon
	CDKN2A	P	114	L:24|T:2|P:2|S:1|H:1|F:1	31	769	9:21971017_24|9:21971016_4|9:21971018_3	skin:974:20|headandneck:988:4|unk:357:3|lung:2761:2|pancreas:1059:1|bladder:958:1	24592	pancan,skin,headandneck	6.37257e-18	single-codon
	ESR1	E	380	Q:14	14	427	6:152332832_14	breast:2561:14	24592	breast,pancan	2.06584e-17	single-codon
	SMAD4	D	351	Y:6|N:5|H:3|G:3|V:2|A:1	20	735	18:48591888_14|18:48591889_6	lung:2761:6|bowel:1782:5|esophagusstomach:1407:4|pancreas:1059:3|biliarytract:358:1|prostate:1379:1	24592	pancan,lung,bowel,esophagusstomach	2.31113e-17	single-codon
	ERBB3	K	329	E:9|T:2|R:1	12	696	12:56482437_9|12:56482438_3	bladder:958:4|breast:2561:3|bowel:1782:2|headandneck:988:1|esophagusstomach:1407:1|uterus:618:1	24592	pancan,bladder,breast	3.29865e-17	single-codon
	PIK3R1	K	567	E:12	12	396	5:67591106_12	uterus:618:4|bowel:1782:4|esophagusstomach:1407:2|lymph:366:1|cnsbrain:2270:1	24592	pancan,uterus,bowel	3.3466e-17	single-codon
	CDKN2A	D	108	Y:14|N:9|H:4|V:1|G:1	29	769	9:21971036_27|9:21971035_2	bladder:958:12|lung:2761:10|headandneck:988:4|biliarytract:358:1|ovaryfallopiantube:699:1|breast:2561:1	24592	pancan,bladder,lung,headandneck	5.4104e-17	single-codon
	KIT	V	559	A:6|D:5|G:3	14	592	4:55593610_14	softtissue:739:8|skin:974:3|breast:2561:1|bowel:1782:1|thymus:162:1	24592	pancan,softtissue,skin	5.59843e-17	single-codon
	CDKN2A	D	84	N:12|Y:6|V:3|G:3|D:1|A:1	26	769	9:21971108_18|9:21971107_7|9:21971106_1	lung:2761:7|esophagusstomach:1407:5|bladder:958:4|pancreas:1059:2|headandneck:988:2|biliarytract:358:2|cnsbrain:2270:1|skin:974:1|unk:357:1|breast:2561:1	24592	pancan,lung,esophagusstomach	6.27026e-17	single-codon
	MTOR	S	2215	Y:12|F:9|T:1	22	939	1:11184573_21|1:11184574_1	bowel:1782:5|kidney:1304:4|uterus:618:4|lung:2761:3|skin:974:2|cervix:239:2|headandneck:988:1|cnsbrain:2270:1	24592	pancan,kidney,bowel	1.24087e-16	single-codon
	TGFBR2	R	553	H:10|C:9|L:3|G:1	23	388	3:30732970_13|3:30732969_10	bowel:1782:13|pancreas:1059:3|headandneck:988:2|unk:357:1|breast:2561:1|skin:974:1|lung:2761:1|esophagusstomach:1407:1	24592	pancan,bowel	1.7378e-16	single-codon
	SMAD2	S	464	*:21	21	236	18:45368211_21	bowel:1782:9|breast:2561:4|esophagusstomach:1407:3|prostate:1379:1|lung:2761:1|pancreas:1059:1|kidney:1304:1|bladder:958:1	24592	pancan,bowel,esophagusstomach	2.59959e-16	single-codon
	RHEB	Y	35	N:5|S:2|H:2|C:2|*:1	12	60	7:151188050_7|7:151188049_4|7:151188048_1	kidney:1304:4|uterus:618:3|testis:217:2|bladder:958:1|pancreas:1059:1|bowel:1782:1	22029	pancan,kidney,uterus,testis	4.97821e-16	single-codon
	TP53	splice	X33_splice	splice:35	35	8466	17:7579591_21|17:7579592_14	bowel:1782:7|lung:2761:5|liver:636:4|kidney:1304:3|headandneck:988:3|pancreas:1059:2|esophagusstomach:1407:2|ovaryfallopiantube:699:2|skin:974:1|unk:357:1|softtissue:739:1|prostate:1379:1|bladder:958:1|breast:2561:1|uterus:618:1	24592	pancan,bowel	5.09683e-16	single-codon
	KIT	L	576	P:14	14	592	4:55593661_14	softtissue:739:6|skin:974:4|testis:217:2|vulvavagina:16:1|headandneck:988:1	24592	pancan,softtissue,skin	6.10111e-16	single-codon
	KIT	V	654	A:8	8	592	4:55594258_8	softtissue:739:8	24592	softtissue,pancan	6.3534e-16	single-codon
	MTOR	T	1977	K:7|R:3|I:3|S:1	14	939	1:11188164_13|1:11188165_1	kidney:1304:6|bowel:1782:2|blood:890:1|uterus:618:1|unk:357:1|bladder:958:1|lung:2761:1|prostate:1379:1	24592	pancan,kidney	7.60484e-16	single-codon
	TP53	F	270	V:8|L:8|S:6|I:4|C:4	30	8466	17:7577130_19|17:7577129_10|17:7577128_1	breast:2561:8|lung:2761:7|esophagusstomach:1407:4|ovaryfallopiantube:699:2|cnsbrain:2270:2|skin:974:1|bladder:958:1|bowel:1782:1|prostate:1379:1|pancreas:1059:1|headandneck:988:1|softtissue:739:1	24592	pancan,breast,lung	1.26152e-15	single-codon
	H3F3A	G	35	R:9|V:2|W:1	12	98	1:226252155_10|1:226252156_2	cnsbrain:2270:10|softtissue:739:1|adrenalgland:291:1	22029	cnsbrain,pancan	1.61533e-15	single-codon
	RRAS2	Q	72	L:7|H:2	9	37	11:14316390_7|11:14316389_2	uterus:618:4|lung:2761:3|headandneck:988:1|prostate:1379:1	14256	pancan,uterus,lung	6.5908e-15	single-codon
	PTEN	R	173	H:17|C:14|P:1	32	1101	10:89711900_18|10:89711899_14	bowel:1782:8|cnsbrain:2270:8|uterus:618:6|prostate:1379:2|lung:2761:1|headandneck:988:1|ovaryfallopiantube:699:1|softtissue:739:1|lymph:366:1|bladder:958:1|biliarytract:358:1|skin:974:1	24592	pancan,bowel	1.02111e-14	single-codon
	CREBBP	Y	1503	H:4|N:2|S:1|D:1|C:1	9	1199	16:3786704_7|16:3786703_2	lymph:366:8|bladder:958:1	24592	lymph,pancan	1.40143e-14	single-codon
	TP53	E	258	K:14|*:14|D:5|Q:4|G:4|A:4|V:1|E:1	47	8466	17:7577509_32|17:7577508_9|17:7577507_5|17:7577506_1	lung:2761:11|pancreas:1059:7|bladder:958:6|bowel:1782:5|breast:2561:4|esophagusstomach:1407:2|liver:636:2|skin:974:2|cnsbrain:2270:2|prostate:1379:2|headandneck:988:2|unk:357:1|ovaryfallopiantube:699:1	24592	pancan,pancreas,lung,bowel,bladder	1.50605e-14	single-codon
	PIK3CA	C	901	F:13	13	2933	3:178947827_13	uterus:618:4|cnsbrain:2270:2|breast:2561:2|biliarytract:358:1|prostate:1379:1|bowel:1782:1|bone:297:1|headandneck:988:1	24592	pancan,uterus	1.63044e-14	single-codon
	GATA3	M	293	K:8|R:1	9	336	10:8106058_9	breast:2561:9	24592	breast,pancan	1.77835e-14	single-codon
	CTNNB1	N	387	K:9|Y:1|I:1	11	800	3:41274911_9|3:41274910_1|3:41274909_1	liver:636:4|pancreas:1059:2|skin:974:1|unk:357:1|lung:2761:1|bowel:1782:1|prostate:1379:1	24592	pancan,liver	2.74229e-14	single-codon
	ERBB4	Q	707	E:6|Q:5	11	1157	2:212488730_6|2:212488728_5	bladder:958:11	24592	bladder	2.78829e-14	single-codon
	RET	M	918	T:11	11	619	10:43617416_11	thyroid:618:6|adrenalgland:291:4|breast:2561:1	24592	thyroid,pancan,adrenalgland	3.89384e-14	single-codon
	CIC	R	202	W:11|Q:2	13	713	19:42791718_11|19:42791719_2	cnsbrain:2270:11|softtissue:739:1|prostate:1379:1	24592	cnsbrain,pancan	8.48772e-14	single-codon
	CDKN2A	Q	50	*:16|H:4|R:3	23	769	9:21974679_16|9:21974677_4|9:21974678_3	skin:974:13|pancreas:1059:4|esophagusstomach:1407:3|lung:2761:2|headandneck:988:1	24592	pancan,skin,pancreas	9.45719e-14	single-codon
	FOXA1	F	266	L:5|C:2|V:1|S:1|I:1|F:1	11	317	14:38061191_5|14:38061193_3|14:38061192_3	prostate:1379:9|breast:2561:2	24592	prostate,pancan	1.05846e-13	single-codon
	ERBB3	A	232	V:14|T:1	15	696	12:56481660_14|12:56481659_1	bowel:1782:5|esophagusstomach:1407:3|headandneck:988:1|biliarytract:358:1|breast:2561:1|unk:357:1|lung:2761:1|pancreas:1059:1|prostate:1379:1	24592	pancan,bowel	1.11785e-13	single-codon
	RB1	splice	X405_splice	splice:19	19	884	13:48947629_19	bladder:958:6|lung:2761:5|cnsbrain:2270:3|prostate:1379:2|ovaryfallopiantube:699:1|uterus:618:1|softtissue:739:1	24592	pancan,bladder,lung	1.54377e-13	single-codon
	SPOP	W	131	G:12|C:4|S:3|L:3|R:1	23	332	17:47696432_13|17:47696431_6|17:47696430_4	prostate:1379:21|uterus:618:1|cnsbrain:2270:1	24592	prostate,pancan	1.96888e-13	single-codon
	SPOP	Y	87	N:8|S:3|C:2|D:1	14	332	17:47696689_9|17:47696688_5	prostate:1379:14	24592	prostate,pancan	1.96888e-13	single-codon
	MTOR	I	2500	F:5|M:4|N:1	10	939	1:11169377_5|1:11169375_4|1:11169376_1	kidney:1304:2|lung:2761:1|headandneck:988:1|unk:357:1|breast:2561:1|uterus:618:1|esophagusstomach:1407:1|skin:974:1|adrenalgland:291:1	24592	pancan	2.29333e-13	single-codon
	SMARCB1	R	377	H:11|C:5|L:1	17	206	22:24176339_12|22:24176338_5	esophagusstomach:1407:4|bowel:1782:3|lung:2761:2|cnsbrain:2270:2|skin:974:1|kidney:1304:1|biliarytract:358:1|breast:2561:1|liver:636:1|softtissue:739:1	24592	pancan,esophagusstomach	2.32554e-13	single-codon
	PIK3CB	D	1067	V:8|Y:3|H:1|A:1	13	358	3:138374244_9|3:138374245_4	skin:974:3|kidney:1304:3|lung:2761:2|testis:217:1|cnsbrain:2270:1|headandneck:988:1|uterus:618:1|thyroid:618:1	24592	pancan,skin,kidney	2.84755e-13	single-codon
	PIK3R1	splice	X582_splice	splice:14	14	396	5:67591246_9|5:67591247_5	cnsbrain:2270:5|uterus:618:3|prostate:1379:3|bowel:1782:2|kidney:1304:1	24592	pancan,cnsbrain,prostate	3.86308e-13	single-codon
	VHL	splice	X114_splice	splice:16	16	383	3:10188197_5|3:10188196_4|3:10183872_4|3:10183873_3	kidney:1304:16	24592	kidney,pancan	4.13998e-13	single-codon
	FGFR3	G	370	C:8	8	494	4:1806089_8	bladder:958:8	24592	bladder,pancan	4.34021e-13	single-codon
	SF3B1	K	666	T:5|N:3|M:2|E:2|Q:1	13	638	2:198267360_7|2:198267361_3|2:198267359_3	lung:2761:3|blood:890:2|unk:357:2|eye:128:2|pancreas:1059:1|breast:2561:1|liver:636:1|skin:974:1	24592	pancan,eye,blood	7.28543e-13	single-codon
	VHL	S	65	*:7|L:6|P:2|W:1|T:1	17	383	3:10183725_14|3:10183724_3	kidney:1304:15|pancreas:1059:1|bladder:958:1	24592	kidney,pancan	7.40697e-13	single-codon
	CDK4	K	22	M:5|Q:2	7	114	12:58145436_5|12:58145437_2	skin:974:6|blood:890:1	24592	skin,pancan	8.18882e-13	single-codon
	TP53	F	134	L:12|V:5|C:4|I:2|S:1	24	8466	17:7578530_13|17:7578528_6|17:7578529_5	esophagusstomach:1407:4|lung:2761:4|breast:2561:3|skin:974:3|pancreas:1059:3|lymph:366:1|prostate:1379:1|uterus:618:1|unk:357:1|bowel:1782:1|ovaryfallopiantube:699:1|headandneck:988:1	24592	pancan,lung,skin,esophagusstomach	8.6042e-13	single-codon
	KIT	W	557	R:6|G:3|S:2|C:1	12	592	4:55593603_9|4:55593604_2|4:55593605_1	testis:217:5|softtissue:739:4|unk:357:1|thymus:162:1|skin:974:1	24592	pancan,testis,softtissue	9.16539e-13	single-codon
	EGFR	R	222	C:15|H:1	16	1164	7:55220274_15|7:55220275_1	cnsbrain:2270:13|skin:974:1|breast:2561:1|bowel:1782:1	24592	cnsbrain,pancan	1.97405e-12	single-codon
	EGFR	R	252	C:9|H:4|P:3	16	1164	7:55221710_9|7:55221711_7	cnsbrain:2270:12|esophagusstomach:1407:2|prostate:1379:1|bowel:1782:1	24592	cnsbrain,pancan	1.97405e-12	single-codon
	FGFR3	K	650	E:7|T:1|N:1|M:1	10	494	4:1807889_7|4:1807890_2|4:1807891_1	bladder:958:4|cnsbrain:2270:2|skin:974:2|blood:890:1|kidney:1304:1	24592	pancan,bladder	2.0068e-12	single-codon
	SMARCA4	G	1232	S:11|V:2|D:2|C:2	17	1088	19:11144113_13|19:11144114_4	lung:2761:5|cnsbrain:2270:3|esophagusstomach:1407:3|kidney:1304:2|lymph:366:1|unk:357:1|softtissue:739:1|skin:974:1	24592	pancan,lung	2.11468e-12	single-codon
	ARID2	S	297	F:16|S:4	20	858	12:46230641_16|12:46230642_4	skin:974:15|unk:357:5	24592	skin,pancan	2.22766e-12	single-codon
	HIST1H1C	A	180	A:21|P:1	22	268	6:26056117_21|6:26056119_1	breast:2561:8|bladder:958:6|lung:2761:5|thymus:162:1|lymph:366:1|headandneck:988:1	24592	pancan,breast,bladder,lung	3.16251e-12	single-codon
	ERBB3	G	284	R:13	13	696	12:56481922_13	bowel:1782:3|esophagusstomach:1407:3|bladder:958:2|biliarytract:358:1|cervix:239:1|unk:357:1|breast:2561:1|uterus:618:1	24592	pancan	4.09603e-12	single-codon
	ERBB2	D	769	Y:12|H:6	18	726	17:37880261_18	esophagusstomach:1407:7|breast:2561:5|bladder:958:3|bowel:1782:1|ovaryfallopiantube:699:1|cervix:239:1	24592	pancan,esophagusstomach,breast	4.15162e-12	single-codon
	PTEN	splice	X70_splice	splice:15	15	1101	10:89685315_6|10:89690802_4|10:89685316_3|10:89690801_2	breast:2561:4|uterus:618:4|thyroid:618:2|unk:357:1|lung:2761:1|cnsbrain:2270:1|prostate:1379:1|skin:974:1	24592	pancan,breast,uterus	5.42734e-12	single-codon
	STK11	E	223	*:13|V:1|K:1	15	448	19:1220649_14|19:1220650_1	lung:2761:13|ampullaofvater:23:1|unk:357:1	24592	lung,pancan	5.43756e-12	single-codon
	FGFR1	K	687	E:8|N:1|K:1|*:1	11	331	8:38272308_9|8:38272306_2	cnsbrain:2270:6|bladder:958:1|liver:636:1|softtissue:739:1|lung:2761:1|blood:890:1	24592	pancan,cnsbrain	6.61101e-12	single-codon
	SOX17	S	403	I:8	8	302	8:55372518_8	uterus:618:7|ovaryfallopiantube:699:1	24592	uterus,pancan	7.18959e-12	single-codon
	VHL	splice	X155_splice	splice:14	14	383	3:10188321_5|3:10191470_4|3:10191469_3|3:10188322_2	kidney:1304:14	24592	kidney,pancan	7.83201e-12	single-codon
	NUP93	E	14	K:16	16	261	16:56782199_16	breast:2561:9|lung:2761:3|bladder:958:2|headandneck:988:1|thyroid:618:1	22029	breast,pancan	8.46295e-12	single-codon
	STK11	splice	X155_splice	splice:14	14	448	19:1220370_6|19:1220371_5|19:1219413_2|19:1219414_1	lung:2761:13|bowel:1782:1	24592	lung,pancan	1.05267e-11	single-codon
	STK11	splice	X245_splice	splice:13	13	448	19:1220717_9|19:1221211_3|19:1220718_1	lung:2761:12|cervix:239:1	24592	lung,pancan	1.05267e-11	single-codon
	TP53	M	246	V:16|I:10|T:3|L:3|K:3|R:2	37	8466	17:7577545_19|17:7577543_10|17:7577544_8	lung:2761:10|cnsbrain:2270:5|esophagusstomach:1407:3|breast:2561:3|prostate:1379:3|kidney:1304:2|softtissue:739:2|bladder:958:2|pancreas:1059:2|headandneck:988:2|bowel:1782:1|biliarytract:358:1|thyroid:618:1	24592	pancan,lung,cnsbrain	1.10581e-11	single-codon
	TP53	R	110	L:25|P:11|C:6|H:1	43	8466	17:7579358_37|17:7579359_6	lung:2761:13|headandneck:988:5|esophagusstomach:1407:3|bowel:1782:3|pancreas:1059:2|softtissue:739:2|prostate:1379:2|ovaryfallopiantube:699:2|skin:974:1|liver:636:1|thyroid:618:1|breast:2561:1|unk:357:1|kidney:1304:1|lymph:366:1|thymus:162:1|vulvavagina:16:1|bladder:958:1|cnsbrain:2270:1	24592	pancan,lung	1.12989e-11	single-codon
	APC	Q	1429	*:22|R:1	23	2141	5:112175576_22|5:112175577_1	bowel:1782:22|ovaryfallopiantube:699:1	24592	bowel,pancan	1.21477e-11	single-codon
	PTEN	C	136	R:9|Y:2|F:2|*:1	14	1101	10:89692922_9|10:89692923_4|10:89692924_1	uterus:618:4|cnsbrain:2270:3|breast:2561:2|kidney:1304:1|lung:2761:1|skin:974:1|bowel:1782:1|headandneck:988:1	24592	pancan,uterus	1.52907e-11	single-codon
	PTEN	G	132	D:8|V:3|S:3|A:3	17	1101	10:89692911_14|10:89692910_3	cnsbrain:2270:8|uterus:618:3|prostate:1379:2|softtissue:739:1|skin:974:1|lung:2761:1|bowel:1782:1	24592	pancan,cnsbrain	1.52907e-11	single-codon
	CCND1	Y	44	D:3|S:1|H:1|F:1|C:1|*:1	8	161	11:69456211_4|11:69456212_3|11:69456213_1	lymph:366:7|blood:890:1	24592	lymph,pancan	1.65225e-11	single-codon
	SMARCA4	R	1192	C:9|H:7|P:1	17	1088	19:11143993_9|19:11143994_8	cnsbrain:2270:4|esophagusstomach:1407:3|skin:974:2|lung:2761:2|uterus:618:1|breast:2561:1|kidney:1304:1|liver:636:1|bladder:958:1|pancreas:1059:1	24592	pancan,cnsbrain	1.69969e-11	single-codon
	INPPL1	A	1185	D:11	11	248	11:71949087_11	adrenalgland:291:4|prostate:1379:2|bladder:958:1|cnsbrain:2270:1|softtissue:739:1|headandneck:988:1|esophagusstomach:1407:1	14256	pancan,adrenalgland	1.76182e-11	single-codon
	SMAD4	P	356	L:10|S:3|R:2|H:1	16	735	18:48591904_13|18:48591903_3	bowel:1782:9|esophagusstomach:1407:4|lung:2761:1|biliarytract:358:1|pancreas:1059:1	24592	pancan,bowel,esophagusstomach	2.15335e-11	single-codon
	ERBB3	S	846	I:10	10	696	12:56491645_10	bowel:1782:3|esophagusstomach:1407:3|bladder:958:1|breast:2561:1|ampullaofvater:23:1|lung:2761:1	24592	pancan,bowel,esophagusstomach	2.59308e-11	single-codon
	CDKN2A	splice	X51_splice	splice:20	20	769	9:21971208_12|9:21971209_7|9:21971207_1	skin:974:6|headandneck:988:4|liver:636:3|lung:2761:2|bladder:958:2|biliarytract:358:1|unk:357:1|bone:297:1	24592	pancan,skin,liver,headandneck	3.09189e-11	single-codon
	STK11	D	194	Y:7|N:3|V:2|H:1|G:1	14	448	19:1220487_11|19:1220488_3	lung:2761:11|prostate:1379:1|breast:2561:1|headandneck:988:1	24592	pancan,lung	3.49154e-11	single-codon
	FBXW7	R	658	*:15|Q:4|R:1	20	795	4:153244185_16|4:153244184_4	bowel:1782:7|uterus:618:6|cervix:239:2|skin:974:1|lung:2761:1|cnsbrain:2270:1|bladder:958:1|headandneck:988:1	24592	pancan,uterus,bowel	3.79187e-11	single-codon
	AR	W	742	C:6|L:1	7	689	X:66937372_6|X:66937371_1	prostate:1379:7	24592	prostate,pancan	4.1023e-11	single-codon
	TP53	V	143	M:12|A:7|G:5|E:2	26	8466	17:7578502_14|17:7578503_12	skin:974:4|lung:2761:3|bowel:1782:3|pancreas:1059:2|liver:636:2|headandneck:988:2|softtissue:739:1|prostate:1379:1|ovaryfallopiantube:699:1|breast:2561:1|lymph:366:1|cnsbrain:2270:1|esophagusstomach:1407:1|uterus:618:1|bladder:958:1|kidney:1304:1	24592	pancan,skin	5.1774e-11	single-codon
	CCND1	P	287	S:5|L:4|T:1|R:1|A:1	12	161	11:69466021_7|11:69466022_5	uterus:618:6|headandneck:988:2|skin:974:1|bowel:1782:1|bladder:958:1|cervix:239:1	24592	pancan,uterus	5.65946e-11	single-codon
	CIC	R	1512	H:5|L:3|C:2|S:1	11	713	19:42799051_8|19:42799050_3	cnsbrain:2270:9|breast:2561:1|bladder:958:1	24592	cnsbrain,pancan	6.01783e-11	single-codon
	FBXW7	R	689	W:14|Q:5	19	795	4:153244092_14|4:153244091_5	bowel:1782:6|uterus:618:6|cnsbrain:2270:3|lung:2761:1|unk:357:1|breast:2561:1|headandneck:988:1	24592	pancan,uterus,bowel	6.54359e-11	single-codon
	MAP2K1	E	203	K:14|V:2	16	240	15:66774131_14|15:66774132_2	skin:974:6|cnsbrain:2270:2|pancreas:1059:1|lung:2761:1|unk:357:1|bowel:1782:1|blood:890:1|bladder:958:1|esophagusstomach:1407:1|breast:2561:1	24592	pancan,skin	6.86895e-11	single-codon
	FOXA1	I	176	V:7|M:4	11	317	14:38061463_7|14:38061461_4	breast:2561:10|lung:2761:1	24592	breast,pancan	7.65742e-11	single-codon
	DICER1	E	1813	G:6|Q:3|K:1|A:1	11	609	14:95557629_7|14:95557630_4	bowel:1782:3|uterus:618:3|thyroid:618:2|ovaryfallopiantube:699:1|skin:974:1|cnsbrain:2270:1	24592	pancan,uterus	1.0377e-10	single-codon
	PTPN11	E	76	K:7|G:3|A:2|Q:1	13	298	12:112888210_8|12:112888211_5	cnsbrain:2270:7|bowel:1782:2|blood:890:2|lung:2761:2	24592	pancan,cnsbrain	1.05061e-10	single-codon
	KNSTRN	S	24	F:13	13	103	15:40675107_13	skin:974:13	14256	skin,pancan	1.46995e-10	single-codon
	NF1	R	440	*:17|Q:2	19	1352	17:29533315_17|17:29533316_2	skin:974:10|unk:357:3|uterus:618:2|bowel:1782:2|breast:2561:1|cnsbrain:2270:1	24592	pancan,skin	1.55777e-10	single-codon
	EGFR	L	747	P:3|L:3|S:1|F:1	8	1164	7:55242469_6|7:55242471_1|7:55242470_1	lung:2761:8	24592	lung,pancan	1.56584e-10	single-codon
	ACVR1	G	328	E:5|V:2	7	179	2:158622516_7	cnsbrain:2270:7	22029	cnsbrain,pancan	2.17276e-10	single-codon
	CCND1	T	286	I:8|A:1	9	161	11:69466019_8|11:69466018_1	uterus:618:6|bladder:958:1|bowel:1782:1|esophagusstomach:1407:1	24592	uterus,pancan	2.39495e-10	single-codon
	VHL	L	89	H:9|P:5|L:1	15	383	3:10183797_14|3:10183798_1	kidney:1304:13|lung:2761:1|bladder:958:1	24592	kidney,pancan	2.84656e-10	single-codon
	NOTCH2	T	235	S:10	10	768	1:120539668_10	lymph:366:5|biliarytract:358:2|thymus:162:1|kidney:1304:1|softtissue:739:1	24592	pancan,lymph,biliarytract	2.89151e-10	single-codon
	CIC	R	1515	H:5|C:5	10	713	19:42799060_5|19:42799059_5	cnsbrain:2270:9|bowel:1782:1	24592	cnsbrain,pancan	3.21217e-10	single-codon
	NFE2L2	L	30	F:7|P:2|H:2|R:1	12	385	2:178098957_7|2:178098956_5	headandneck:988:4|lung:2761:2|kidney:1304:2|liver:636:1|softtissue:739:1|pancreas:1059:1|esophagusstomach:1407:1	24592	pancan,headandneck	3.26181e-10	single-codon
	TP53	S	127	F:31|Y:10|P:4|T:1|S:1|C:1	48	8466	17:7578550_42|17:7578551_5|17:7578549_1	bowel:1782:8|lung:2761:8|skin:974:6|cnsbrain:2270:4|headandneck:988:4|esophagusstomach:1407:3|pancreas:1059:3|ovaryfallopiantube:699:3|uterus:618:2|unk:357:2|breast:2561:2|bladder:958:2|prostate:1379:1	24592	pancan,bowel	3.33046e-10	single-codon
	SF3B1	N	626	Y:4|H:2|D:2	8	638	2:198267481_8	blood:890:3|skin:974:2|uterus:618:1|lung:2761:1|breast:2561:1	24592	pancan,blood	3.34579e-10	single-codon
	EGFR	E	709	K:13|A:2|Q:1	16	1164	7:55241677_14|7:55241678_2	lung:2761:9|cnsbrain:2270:3|bladder:958:1|breast:2561:1|skin:974:1|ovaryfallopiantube:699:1	24592	pancan,lung	3.57278e-10	single-codon
	TP53	Q	136	*:16|E:10|P:3|L:1|H:1	31	8466	17:7578524_26|17:7578523_4|17:7578522_1	headandneck:988:6|breast:2561:6|cnsbrain:2270:5|skin:974:3|liver:636:2|kidney:1304:1|bladder:958:1|lung:2761:1|penis:6:1|pancreas:1059:1|ovaryfallopiantube:699:1|esophagusstomach:1407:1|bowel:1782:1|softtissue:739:1	24592	pancan,headandneck,breast,cnsbrain	3.67042e-10	single-codon
	ERBB3	H	228	Q:6|R:2	8	696	12:56481649_6|12:56481648_2	bladder:958:6|esophagusstomach:1407:2	24592	bladder,pancan	4.40385e-10	single-codon
	TP53	C	277	F:20|Y:3|*:3|W:1|G:1	28	8466	17:7577108_23|17:7577107_4|17:7577109_1	lung:2761:8|esophagusstomach:1407:3|cnsbrain:2270:3|unk:357:2|bone:297:2|bladder:958:2|blood:890:1|thyroid:618:1|bowel:1782:1|biliarytract:358:1|breast:2561:1|ovaryfallopiantube:699:1|liver:636:1|headandneck:988:1	24592	pancan,lung	5.26919e-10	single-codon
	APC	Q	1367	*:28|E:1	29	2141	5:112175390_29	bowel:1782:28|lung:2761:1	24592	bowel	5.92531e-10	single-codon
	ERCC2	T	484	M:4|A:4	8	355	19:45860557_4|19:45860556_4	bladder:958:7|liver:636:1	24592	bladder,pancan	5.94542e-10	single-codon
	MYOD1	L	122	R:5|M:1|L:1	7	179	11:17741694_5|11:17741695_1|11:17741693_1	softtissue:739:5|lung:2761:2	24592	softtissue,pancan	6.09834e-10	single-codon
	ERG	R	354	R:6	6	295	21:39755703_6	prostate:1379:6	24592	prostate	7.20192e-10	single-codon
	TP53	W	91	*:35	35	8466	17:7579414_21|17:7579415_14	lung:2761:6|esophagusstomach:1407:6|breast:2561:3|pancreas:1059:3|bladder:958:3|bowel:1782:3|skin:974:2|cnsbrain:2270:2|softtissue:739:2|unk:357:1|prostate:1379:1|kidney:1304:1|headandneck:988:1|biliarytract:358:1	24592	pancan,esophagusstomach	7.2914e-10	single-codon
	ARID1A	R	693	*:16	16	1439	1:27087503_16	uterus:618:7|esophagusstomach:1407:3|bowel:1782:2|thyroid:618:1|bladder:958:1|breast:2561:1|cnsbrain:2270:1	24592	pancan,uterus	8.6235e-10	single-codon
	FOXA1	H	247	Y:4|R:3|Q:2|L:1	10	317	14:38061250_4|14:38061249_4|14:38061248_2	prostate:1379:7|breast:2561:3	24592	prostate,pancan,breast	8.78144e-10	single-codon
	GNAS	Q	227	L:4|H:4|K:3	11	515	20:57484597_4|20:57484596_4|20:57484595_3	lung:2761:6|liver:636:1|ovaryfallopiantube:699:1|bowel:1782:1|thyroid:618:1|skin:974:1	24592	pancan,lung	9.92975e-10	single-codon
	PARP1	G	500	G:6	6	324	1:226567666_6	esophagusstomach:1407:6	24592	esophagusstomach,pancan	1.14978e-09	single-codon
	CTNNB1	H	36	P:7|Y:1	8	800	3:41266110_7|3:41266109_1	liver:636:7|skin:974:1	24592	liver,pancan	1.23306e-09	single-codon
	NFE2L2	W	24	R:7|C:3|S:1	11	385	2:178098975_7|2:178098973_3|2:178098974_1	lung:2761:3|kidney:1304:2|headandneck:988:2|liver:636:1|skin:974:1|bladder:958:1|esophagusstomach:1407:1	24592	pancan,lung	1.25844e-09	single-codon
	HRAS	K	117	N:8|R:1	9	275	11:533552_8|11:533553_1	bladder:958:4|thymus:162:3|breast:2561:1|headandneck:988:1	24592	pancan,bladder,thymus	1.3705e-09	single-codon
	KDM6A	Q	555	*:16	16	612	X:44922802_16	bladder:958:16	24592	bladder,pancan	1.37233e-09	single-codon
	TP53	E	298	*:36|Q:1	37	8466	17:7577046_37	lung:2761:18|headandneck:988:7|esophagusstomach:1407:3|breast:2561:2|unk:357:2|prostate:1379:2|skin:974:1|pancreas:1059:1|softtissue:739:1	24592	lung,pancan,headandneck	1.49797e-09	single-codon
	ARID1A	R	2158	*:12|Q:2|R:1	15	1439	1:27106861_13|1:27106862_2	bowel:1782:3|esophagusstomach:1407:3|lung:2761:2|uterus:618:2|skin:974:2|liver:636:1|headandneck:988:1|bladder:958:1	24592	pancan	1.61815e-09	single-codon
	B2M	splice	X23_splice	splice:17	17	189	15:45007619_6|15:45007620_5|15:45003812_5|15:45003813_1	bowel:1782:9|lymph:366:3|skin:974:2|esophagusstomach:1407:2|lung:2761:1	24592	pancan,bowel	1.71517e-09	single-codon
	ATM	R	3008	H:7|C:6|L:2	15	1291	11:108236087_9|11:108236086_6	bowel:1782:6|lung:2761:3|pancreas:1059:2|lymph:366:2|bladder:958:1|esophagusstomach:1407:1	24592	pancan,bowel	1.74669e-09	single-codon
	EGFR	L	62	R:10	10	1164	7:55210075_10	cnsbrain:2270:6|lung:2761:4	24592	pancan,cnsbrain,lung	1.90253e-09	single-codon
	KIT	D	820	Y:4|V:3|E:2|G:1|A:1	11	592	4:55599333_5|4:55599332_4|4:55599334_2	softtissue:739:6|testis:217:2|unk:357:2|penis:6:1	24592	pancan,softtissue,testis	1.9213e-09	single-codon
	PTEN	D	92	E:7|G:3|Y:2|V:2|N:2|H:2	18	1101	10:89692792_7|10:89692790_6|10:89692791_5	breast:2561:4|uterus:618:4|cnsbrain:2270:3|bowel:1782:2|lung:2761:2|headandneck:988:1|ovaryfallopiantube:699:1|softtissue:739:1	24592	pancan,uterus	2.81114e-09	single-codon
	NFE2L2	Q	26	K:4|P:2|R:1|L:1|H:1	9	385	2:178098969_4|2:178098968_4|2:178098967_1	lung:2761:4|liver:636:2|esophagusstomach:1407:1|breast:2561:1|uterus:618:1	24592	pancan,lung	2.81198e-09	single-codon
	TET1	P	1752	P:8|S:2	10	760	10:70446316_8|10:70446314_2	skin:974:10	24592	skin	2.87599e-09	single-codon
	FGFR4	V	550	L:7|M:4	11	352	5:176522551_11	breast:2561:6|softtissue:739:4|uterus:618:1	24592	breast,pancan,softtissue	2.94821e-09	single-codon
	KRAS	A	59	T:5|G:4|A:2|E:1	12	2885	12:25380283_5|12:25380282_4|12:25380281_2|12:25380279_1	blood:890:3|lung:2761:3|bowel:1782:2|esophagusstomach:1407:2|prostate:1379:1|kidney:1304:1	24592	pancan	3.18312e-09	single-codon
	PTEN	splice	X343_splice	splice:15	15	1101	10:89725043_9|10:89725042_6	lung:2761:4|uterus:618:3|kidney:1304:2|breast:2561:1|unk:357:1|ovaryfallopiantube:699:1|cnsbrain:2270:1|cervix:239:1|bladder:958:1	24592	pancan	3.31241e-09	single-codon
	DIS3	D	488	N:7|Y:1|H:1|G:1|A:1	11	314	13:73346338_9|13:73346337_2	blood:890:4|lung:2761:4|headandneck:988:1|cnsbrain:2270:1|kidney:1304:1	24592	pancan,blood,lung	3.46224e-09	single-codon
	CDH1	D	254	N:5|Y:4|E:2	11	556	16:68844172_9|16:68844174_2	esophagusstomach:1407:9|penis:6:1|bowel:1782:1	24592	esophagusstomach,pancan	3.4682e-09	single-codon
	CDKN2A	E	88	*:18|K:8|E:1	27	769	9:21971096_26|9:21971093_1	skin:974:10|headandneck:988:7|unk:357:4|pancreas:1059:2|cnsbrain:2270:1|lung:2761:1|softtissue:739:1|cervix:239:1	24592	pancan,headandneck,skin	3.70242e-09	single-codon
	MYD88	S	243	N:7	7	140	3:38182292_7	lymph:366:6|breast:2561:1	24592	lymph,pancan	4.7804e-09	single-codon
	PIK3CA	G	1007	R:9|D:1	10	2933	3:178951964_9|3:178951965_1	bowel:1782:2|breast:2561:2|kidney:1304:1|bladder:958:1|lung:2761:1|uterus:618:1|headandneck:988:1|cervix:239:1	24592	pancan	5.22207e-09	single-codon
	PTEN	Y	68	H:6|C:2|*:2|N:1	11	1101	10:89685307_7|10:89685309_2|10:89685308_2	bowel:1782:4|cnsbrain:2270:3|uterus:618:2|breast:2561:1|prostate:1379:1	24592	pancan,bowel	5.27637e-09	single-codon
	GNAQ	T	96	S:9	9	206	9:80537112_9	lymph:366:2|kidney:1304:2|lung:2761:1|prostate:1379:1|pancreas:1059:1|liver:636:1|biliarytract:358:1	24592	pancan,lymph,kidney	6.19698e-09	single-codon
	SETD2	R	1625	C:6|H:5|S:1|L:1	13	904	3:47144880_7|3:47144879_6	skin:974:3|lung:2761:3|kidney:1304:3|thyroid:618:1|uterus:618:1|breast:2561:1|cnsbrain:2270:1	24592	pancan	6.83579e-09	single-codon
	SDHA	L	639	V:7	7	275	5:256455_7	lymph:366:6|cnsbrain:2270:1	24592	lymph,pancan	7.18357e-09	single-codon
	PIK3CA	T	1025	A:7|S:1	8	2933	3:178952018_8	uterus:618:4|bowel:1782:2|breast:2561:2	24592	pancan,uterus	8.49324e-09	single-codon
	SOS1	N	233	Y:7	7	233	2:39281778_7	lung:2761:4|uterus:618:3	14256	pancan,lung,uterus	9.34176e-09	single-codon
	PIK3CA	C	378	F:4|R:3|Y:2	9	2933	3:178922364_6|3:178922363_3	cnsbrain:2270:2|breast:2561:2|uterus:618:2|ovaryfallopiantube:699:1|pancreas:1059:1|esophagusstomach:1407:1	24592	pancan	9.90901e-09	single-codon
	FOXA1	M	253	K:4|R:2|T:1	7	317	14:38061231_7	prostate:1379:6|breast:2561:1	24592	prostate,pancan	1.06202e-08	single-codon
	ARID1A	R	1276	*:14|Q:1	15	1439	1:27099947_14|1:27099948_1	uterus:618:4|bowel:1782:3|unk:357:2|esophagusstomach:1407:2|blood:890:1|lymph:366:1|bladder:958:1|pancreas:1059:1	24592	pancan,uterus	1.08597e-08	single-codon
	PTEN	splice	X212_splice	splice:19	19	1101	10:89717609_7|10:89712017_5|10:89712018_4|10:89717608_3	breast:2561:4|cnsbrain:2270:3|uterus:618:3|bowel:1782:2|headandneck:988:1|pancreas:1059:1|prostate:1379:1|lung:2761:1|kidney:1304:1|liver:636:1|cervix:239:1	24592	pancan	1.13062e-08	single-codon
	EIF1AX	G	9	D:6|R:3|V:2	11	127	X:20156731_8|X:20156732_3	thyroid:618:4|lung:2761:2|eye:128:2|ovaryfallopiantube:699:1|bowel:1782:1|headandneck:988:1	24592	pancan,thyroid	1.14561e-08	single-codon
	FGFR3	G	380	R:11	11	494	4:1806119_11	bladder:958:5|headandneck:988:3|skin:974:1|breast:2561:1|esophagusstomach:1407:1	24592	pancan,bladder,headandneck	1.2052e-08	single-codon
	FBXW7	R	367	*:16|P:1	17	795	4:153251907_16|4:153251906_1	bowel:1782:9|esophagusstomach:1407:2|pancreas:1059:1|headandneck:988:1|lung:2761:1|softtissue:739:1|cervix:239:1|uterus:618:1	24592	pancan,bowel	1.2902e-08	single-codon
	TCF7L2	R	471	C:8|H:4|S:2	14	291	10:114925333_10|10:114925334_4	bowel:1782:13|esophagusstomach:1407:1	22029	bowel,pancan	1.30421e-08	single-codon
	RHOA	R	5	W:8|Q:8|L:1	17	262	3:49413009_9|3:49413010_8	esophagusstomach:1407:8|lymph:366:6|breast:2561:2|bowel:1782:1	24592	pancan,lymph,esophagusstomach	1.52155e-08	single-codon
	PIK3CA	D	350	N:6|G:5|V:1	12	2933	3:178921567_6|3:178921566_6	breast:2561:2|bowel:1782:2|uterus:618:2|skin:974:1|headandneck:988:1|cnsbrain:2270:1|pancreas:1059:1|lung:2761:1|esophagusstomach:1407:1	24592	pancan	2.16868e-08	single-codon
	MAP2K1	G	128	D:5|V:4|R:1	10	240	15:66729175_9|15:66729174_1	bowel:1782:4|lung:2761:2|skin:974:2|esophagusstomach:1407:1|biliarytract:358:1	24592	pancan,bowel	2.50288e-08	single-codon
	PTEN	H	93	R:6|Y:4|P:1|L:1	12	1101	10:89692794_8|10:89692793_4	uterus:618:3|cnsbrain:2270:2|breast:2561:2|bowel:1782:1|skin:974:1|headandneck:988:1|bladder:958:1|softtissue:739:1	24592	pancan	2.90249e-08	single-codon
	SF3B1	K	741	N:5|E:2|T:1|Q:1|*:1	10	638	2:198266709_5|2:198266711_4|2:198266710_1	liver:636:3|lung:2761:2|blood:890:1|breast:2561:1|skin:974:1|kidney:1304:1|prostate:1379:1	24592	pancan,liver	3.09082e-08	single-codon
	BRAF	L	597	R:3|Q:3|S:2|V:1|L:1	10	1450	7:140453145_8|7:140453146_2	skin:974:6|blood:890:1|uterus:618:1|cnsbrain:2270:1|prostate:1379:1	24592	pancan,skin	3.69731e-08	single-codon
	RAC1	A	178	V:12	12	157	7:6441974_12	headandneck:988:6|bowel:1782:2|lung:2761:1|softtissue:739:1|cnsbrain:2270:1|cervix:239:1	24592	pancan,headandneck	4.64277e-08	single-codon
	VHL	S	80	R:5|N:4|S:1|I:1	11	383	3:10183771_5|3:10183770_5|3:10183769_1	kidney:1304:10|pancreas:1059:1	24592	pancan,kidney	4.73395e-08	single-codon
	NF1	R	2450	*:16|Q:1	17	1352	17:29677227_16|17:29677228_1	uterus:618:5|cnsbrain:2270:4|bowel:1782:3|bladder:958:2|breast:2561:1|headandneck:988:1|cervix:239:1	24592	pancan,uterus	5.45596e-08	single-codon
	RB1	R	251	*:15|Q:1	16	884	13:48936983_15|13:48936984_1	bladder:958:4|lung:2761:3|esophagusstomach:1407:2|headandneck:988:2|uterus:618:1|cnsbrain:2270:1|unk:357:1|skin:974:1|breast:2561:1	24592	pancan	5.87879e-08	single-codon
	RB1	R	320	*:14	14	884	13:48941648_14	uterus:618:2|pancreas:1059:2|lung:2761:2|breast:2561:1|skin:974:1|kidney:1304:1|unk:357:1|ovaryfallopiantube:699:1|esophagusstomach:1407:1|headandneck:988:1|bladder:958:1	24592	pancan	5.87879e-08	single-codon
	PIK3CB	E	1051	K:9|G:2	11	358	3:138374293_9|3:138374292_2	kidney:1304:2|prostate:1379:2|biliarytract:358:1|softtissue:739:1|bowel:1782:1|lung:2761:1|esophagusstomach:1407:1|bladder:958:1|breast:2561:1	24592	pancan	5.95654e-08	single-codon
	ACVR1	R	258	G:5|M:1	6	179	2:158626898_5|2:158626897_1	cnsbrain:2270:5|esophagusstomach:1407:1	22029	cnsbrain,pancan	6.82569e-08	single-codon
	APC	Q	1378	*:23	23	2141	5:112175423_23	bowel:1782:23	24592	bowel	6.87809e-08	single-codon
	TP63	R	379	C:14|H:2|S:1	17	665	3:189587118_15|3:189587119_2	skin:974:14|blood:890:1|unk:357:1|bowel:1782:1	24592	skin,pancan	8.73353e-08	single-codon
	MAX	H	28	R:6	6	112	14:65560514_6	uterus:618:5|testis:217:1	24592	uterus,pancan	8.97389e-08	single-codon
	ERCC2	Y	24	C:5	5	355	19:45873425_5	bladder:958:5	24592	bladder,pancan	9.89549e-08	single-codon
	PTPN11	Q	510	L:5|H:3|E:1	9	298	12:112926909_5|12:112926910_3|12:112926908_1	cnsbrain:2270:3|blood:890:3|skin:974:2|softtissue:739:1	24592	pancan,blood,cnsbrain	1.01221e-07	single-codon
	SMAD4	R	445	*:16|Q:1	17	735	18:48603032_16|18:48603033_1	pancreas:1059:5|bowel:1782:4|esophagusstomach:1407:2|skin:974:1|bladder:958:1|breast:2561:1|biliarytract:358:1|unk:357:1|cervix:239:1	24592	pancan	1.11424e-07	single-codon
	RAF1	S	259	F:7|P:3|S:1|C:1	12	233	3:12645693_8|3:12645694_3|3:12645692_1	skin:974:3|lung:2761:3|bowel:1782:1|bladder:958:1|unk:357:1|biliarytract:358:1|headandneck:988:1|lymph:366:1	24592	pancan	1.11524e-07	single-codon
	ARAF	S	214	F:4|A:3|P:2|Y:1|S:1|C:1	12	235	X:47426121_6|X:47426120_5|X:47426122_1	lung:2761:5|kidney:1304:2|skin:974:2|biliarytract:358:1|blood:890:1|bowel:1782:1	24592	pancan,lung	1.1168e-07	single-codon
	TP53	G	154	V:23|D:1|C:1	25	8466	17:7578469_24|17:7578470_1	lung:2761:17|bowel:1782:3|liver:636:1|esophagusstomach:1407:1|bladder:958:1|unk:357:1|pancreas:1059:1	24592	lung,pancan	1.14504e-07	single-codon
	MYC	P	74	S:4|L:4|T:2|R:1|Q:1	12	249	8:128750684_6|8:128750683_6	lung:2761:4|softtissue:739:2|skin:974:2|lymph:366:1|headandneck:988:1|uterus:618:1|blood:890:1	24592	pancan,lung	1.17925e-07	single-codon
	TP53	splice	X332_splice	splice:48	48	8466	17:7574034_34|17:7574035_14	lung:2761:8|breast:2561:6|headandneck:988:5|bladder:958:4|uterus:618:4|cnsbrain:2270:4|liver:636:3|bowel:1782:3|ovaryfallopiantube:699:3|esophagusstomach:1407:2|skin:974:2|prostate:1379:1|biliarytract:358:1|lymph:366:1|softtissue:739:1	24592	pancan	1.2492e-07	single-codon
	ETV6	splice	X11_splice	splice:5	5	248	12:11803095_5	lymph:366:5	24592	lymph	1.46221e-07	single-codon
	PIK3CA	P	104	L:10|R:1	11	2933	3:178916924_10|3:178916923_1	breast:2561:3|skin:974:2|uterus:618:2|cnsbrain:2270:1|ovaryfallopiantube:699:1|lung:2761:1|headandneck:988:1	24592	pancan,breast	1.6102e-07	single-codon
	CTCF	R	377	C:9|H:3	12	360	16:67654642_9|16:67654643_3	uterus:618:8|bowel:1782:2|skin:974:2	24592	uterus,pancan	1.65355e-07	single-codon
	TP53	L	130	V:13|F:10|R:4|P:2|H:1	30	8466	17:7578542_23|17:7578541_7	esophagusstomach:1407:5|bowel:1782:5|pancreas:1059:5|cnsbrain:2270:5|lung:2761:4|ovaryfallopiantube:699:2|unk:357:1|liver:636:1|prostate:1379:1|breast:2561:1	24592	pancan,cnsbrain	2.06448e-07	single-codon
	STAG2	R	216	*:11|Q:2|R:1	14	605	X:123179197_12|X:123179198_2	bladder:958:6|bone:297:2|unk:357:1|uterus:618:1|lung:2761:1|kidney:1304:1|cnsbrain:2270:1|biliarytract:358:1	24592	pancan,bladder	2.21332e-07	single-codon
	FGFR3	S	371	C:5	5	494	4:1806092_5	bladder:958:5	24592	bladder,pancan	2.53645e-07	single-codon
	SF3B1	G	742	D:8	8	638	2:198266611_8	blood:890:5|cervix:239:1|lung:2761:1|kidney:1304:1	24592	blood,pancan	2.57041e-07	single-codon
	RB1	splice	X500_splice	splice:10	10	884	13:48955382_3|13:48954379_3|13:48955381_2|13:48954378_2	lung:2761:2|bladder:958:2|kidney:1304:1|softtissue:739:1|skin:974:1|liver:636:1|headandneck:988:1|cervix:239:1	24592	pancan	2.59332e-07	single-codon
	CDK6	L	65	L:9	9	107	7:92462443_9	bladder:958:8|cervix:239:1	24592	bladder	2.88834e-07	single-codon
	TP53	Q	317	*:32	32	8466	17:7576897_32	lung:2761:7|skin:974:6|esophagusstomach:1407:5|bladder:958:2|unk:357:2|ovaryfallopiantube:699:2|breast:2561:1|pancreas:1059:1|bone:297:1|bowel:1782:1|headandneck:988:1|blood:890:1|softtissue:739:1|cnsbrain:2270:1	24592	pancan,esophagusstomach,skin	3.10293e-07	single-codon
	TGFBR1	S	241	L:12|S:2|*:1	15	262	9:101900288_13|9:101900289_2	bowel:1782:9|uterus:618:1|biliarytract:358:1|esophagusstomach:1407:1|ampullaofvater:23:1|ovaryfallopiantube:699:1|pancreas:1059:1	24592	bowel,pancan	3.26275e-07	single-codon
	CDKN2A	E	120	*:16|K:1|D:1	18	769	9:21971000_17|9:21970998_1	headandneck:988:5|lung:2761:4|esophagusstomach:1407:3|pancreas:1059:2|liver:636:1|skin:974:1|cnsbrain:2270:1|kidney:1304:1	24592	pancan,headandneck	3.48692e-07	single-codon
	PAX5	V	26	G:9	9	246	9:37020768_9	esophagusstomach:1407:3|bowel:1782:3|prostate:1379:1|pleura:76:1|headandneck:988:1	24592	pancan,esophagusstomach,bowel	3.72239e-07	single-codon
	STAT3	H	410	R:4|P:2	6	262	17:40481576_6	liver:636:4|lung:2761:1|breast:2561:1	22029	liver,pancan	3.91618e-07	single-codon
	TP63	splice	X194_splice	splice:5	5	665	3:189582020_5	headandneck:988:5	24592	headandneck	3.99901e-07	single-codon
	FBXW7	S	582	L:10|S:1|P:1	12	795	4:153245446_10|4:153245447_1|4:153245445_1	bowel:1782:10|lung:2761:1|esophagusstomach:1407:1	24592	bowel,pancan	4.01508e-07	single-codon
	RHOA	A	161	V:5|T:2	7	262	3:49397742_5|3:49397743_2	bladder:958:6|lymph:366:1	24592	bladder,pancan	4.19521e-07	single-codon
	EP300	Y	1414	C:6|D:1	7	871	22:41565575_6|22:41565574_1	lung:2761:3|bladder:958:2|headandneck:988:1|esophagusstomach:1407:1	24592	pancan,lung	4.30606e-07	single-codon
	ERBB3	E	332	K:13|Q:1	14	696	12:56482537_14	bladder:958:10|lung:2761:2|cervix:239:1|esophagusstomach:1407:1	24592	bladder,pancan	4.75403e-07	single-codon
	EP300	W	1466	L:3|C:2|R:1|G:1|*:1	8	871	22:41566520_4|22:41566521_2|22:41566519_2	bowel:1782:4|esophagusstomach:1407:2|lymph:366:1|headandneck:988:1	24592	pancan,bowel	4.8236e-07	single-codon
	EP300	Y	1467	N:2|D:2|S:1|K:1|H:1|C:1	8	871	22:41566522_6|22:41566523_2	lymph:366:3|headandneck:988:2|cnsbrain:2270:1|uterus:618:1|bladder:958:1	24592	pancan,lymph	4.8236e-07	single-codon
	MET	V	1070	E:2|A:2|R:1	5	591	7:116415115_4|7:116415114_1	kidney:1304:5	24592	kidney,pancan	5.23737e-07	single-codon
	MET	M	1250	T:6	6	591	7:116423474_6	kidney:1304:5|unk:357:1	24592	kidney,pancan	5.23737e-07	single-codon
	ATM	R	250	*:14|P:1	15	1291	11:108115600_14|11:108115601_1	bowel:1782:5|uterus:618:4|bladder:958:2|skin:974:2|prostate:1379:1|kidney:1304:1	24592	pancan,bowel	5.72626e-07	single-codon
	PIK3CA	M	1	V:6	6	2933	3:178916614_6	cnsbrain:2270:5|uterus:618:1	24592	cnsbrain,pancan	6.05537e-07	single-codon
	SDHA	S	445	S:9|L:1	10	275	5:236617_9|5:236616_1	lymph:366:6|prostate:1379:1|breast:2561:1|esophagusstomach:1407:1|bladder:958:1	24592	lymph,pancan	7.30148e-07	single-codon
	SMAD4	G	419	W:4|V:3|R:1	8	735	18:48593504_5|18:48593505_3	bowel:1782:7|esophagusstomach:1407:1	24592	bowel,pancan	7.34281e-07	single-codon
	PIK3R1	R	348	*:16	16	396	5:67588951_16	uterus:618:8|bowel:1782:7|breast:2561:1	24592	pancan,uterus,bowel	7.67868e-07	single-codon
	SMARCA4	M	781	I:6|V:2|L:1	9	1088	19:11123693_6|19:11123691_3	cnsbrain:2270:3|esophagusstomach:1407:3|biliarytract:358:1|pancreas:1059:1|lung:2761:1	24592	pancan,esophagusstomach,cnsbrain	8.4422e-07	single-codon
	FOXA1	R	261	G:4|C:3|S:1|H:1	9	317	14:38061208_8|14:38061207_1	prostate:1379:8|bladder:958:1	24592	prostate,pancan	8.57798e-07	single-codon
	FBXW7	Y	545	C:6|*:1	7	795	4:153247168_6|4:153247167_1	esophagusstomach:1407:3|bowel:1782:1|breast:2561:1|uterus:618:1|headandneck:988:1	24592	pancan,esophagusstomach	9.29533e-07	single-codon
	ERBB4	L	798	R:7|P:2|L:1|H:1	11	1157	2:212426722_10|2:212426721_1	esophagusstomach:1407:8|bowel:1782:1|kidney:1304:1|bladder:958:1	24592	esophagusstomach,pancan	1.0529e-06	single-codon
	VHL	S	111	N:6|R:2|S:1|P:1	10	383	3:10183863_6|3:10183864_3|3:10183862_1	kidney:1304:10	24592	kidney,pancan	1.14555e-06	single-codon
	KIT	Y	823	D:5|C:1	6	592	4:55599341_5|4:55599342_1	softtissue:739:3|testis:217:2|bowel:1782:1	24592	pancan,softtissue,testis	1.193e-06	single-codon
	RB1	splice	X474_splice	splice:9	9	884	13:48954299_3|13:48954221_3|13:48954300_2|13:48954222_1	lung:2761:4|skin:974:3|cnsbrain:2270:1|bowel:1782:1	24592	pancan,lung	1.34475e-06	single-codon
	BCL6	R	594	Q:10|G:2	12	287	3:187443345_10|3:187443346_2	bowel:1782:7|bladder:958:2|uterus:618:2|headandneck:988:1	24592	bowel,pancan	1.3692e-06	single-codon
	CDH1	splice	X278_splice	splice:6	6	556	16:68844245_3|16:68845585_2|16:68844246_1	breast:2561:6	24592	breast,pancan	1.38818e-06	single-codon
	ARID1A	R	1721	*:13	13	1439	1:27105550_13	esophagusstomach:1407:3|bowel:1782:3|uterus:618:2|biliarytract:358:1|lung:2761:1|skin:974:1|liver:636:1|cnsbrain:2270:1	24592	pancan	1.45531e-06	single-codon
	U2AF1	Q	157	R:2|P:2	4	192	21:44514777_4	blood:890:4	24592	blood	1.61504e-06	single-codon
	ATM	N	2875	S:5|T:2|K:1	8	1291	11:108218045_7|11:108218046_1	prostate:1379:3|bowel:1782:2|liver:636:2|breast:2561:1	24592	pancan,prostate	1.70076e-06	single-codon
	PTPN11	E	69	K:9|D:2	11	298	12:112888189_9|12:112888191_2	cnsbrain:2270:6|breast:2561:2|bowel:1782:2|esophagusstomach:1407:1	24592	pancan,cnsbrain	1.80787e-06	single-codon
	FUBP1	R	430	C:11|H:1	12	253	1:78428511_11|1:78428510_1	uterus:618:6|bowel:1782:2|breast:2561:1|prostate:1379:1|cervix:239:1|esophagusstomach:1407:1	24592	uterus,pancan	1.92219e-06	single-codon
	MTOR	F	1888	I:4|L:3|V:1	8	939	1:11189847_6|1:11189845_2	kidney:1304:5|uterus:618:2|bowel:1782:1	24592	kidney,pancan	1.972e-06	single-codon
	MTOR	L	2427	Q:4|R:3	7	939	1:11174395_7	kidney:1304:5|uterus:618:1|cnsbrain:2270:1	24592	kidney,pancan	1.972e-06	single-codon
	FBXW7	G	423	V:8|A:1|*:1	10	795	4:153249510_9|4:153249511_1	uterus:618:5|bowel:1782:2|skin:974:1|blood:890:1|headandneck:988:1	24592	pancan,uterus	2.07099e-06	single-codon
	CDKN2A	splice	X153_splice	splice:16	16	769	9:21968242_10|9:21970900_3|9:21968243_2|9:21970899_1	headandneck:988:10|esophagusstomach:1407:3|skin:974:2|lung:2761:1	24592	headandneck,pancan	2.19077e-06	single-codon
	APC	E	1397	*:19	19	2141	5:112175480_19	bowel:1782:19	24592	bowel	2.58294e-06	single-codon
	APC	Y	935	*:13	13	2141	5:112174096_13	bowel:1782:13	24592	bowel	2.58294e-06	single-codon
	EPAS1	P	531	L:2|S:1|A:1	4	192	2:46607403_2|2:46607402_2	adrenalgland:291:4	14256	adrenalgland	2.74584e-06	single-codon
	PTEN	Y	27	D:4|N:2|C:2|H:1|*:1	10	1101	10:89624305_7|10:89653782_2|10:89653783_1	cnsbrain:2270:3|uterus:618:2|breast:2561:1|bowel:1782:1|thyroid:618:1|ovaryfallopiantube:699:1|esophagusstomach:1407:1	24592	pancan	2.97185e-06	single-codon
	VHL	N	78	S:4|Y:2|D:2|K:1	9	383	3:10183764_4|3:10183763_4|3:10183765_1	kidney:1304:8|pancreas:1059:1	24592	pancan,kidney	3.06267e-06	single-codon
	ACVR1	R	206	H:8	8	179	2:158630626_8	uterus:618:6|cnsbrain:2270:2	22029	uterus,pancan	3.09527e-06	single-codon
	AKT1	L	52	R:4|H:1	5	310	14:105246445_5	breast:2561:4|kidney:1304:1	24592	breast,pancan	3.30992e-06	single-codon
	IL7R	K	395	R:4|T:3|N:2|K:2|M:1	12	423	5:35876392_8|5:35876393_4	esophagusstomach:1407:6|skin:974:2|bladder:958:1|bowel:1782:1|lung:2761:1|uterus:618:1	24592	esophagusstomach,pancan	3.44668e-06	single-codon
	SMARCA4	R	1189	Q:7|G:3|L:1|*:1	12	1088	19:11143985_8|19:11143984_4	headandneck:988:2|bladder:958:2|cnsbrain:2270:2|unk:357:2|bowel:1782:1|lung:2761:1|skin:974:1|pancreas:1059:1	24592	pancan	3.57046e-06	single-codon
	PTPN11	G	503	V:8|G:1	9	298	12:112926888_8|12:112926889_1	lung:2761:3|esophagusstomach:1407:3|blood:890:1|bladder:958:1|bowel:1782:1	24592	pancan,esophagusstomach	3.59244e-06	single-codon
	ARID1A	G	2087	R:10|E:3	13	1439	1:27106648_10|1:27106649_3	esophagusstomach:1407:5|bowel:1782:2|skin:974:2|uterus:618:1|pancreas:1059:1|lung:2761:1|cervix:239:1	24592	pancan,esophagusstomach	3.8211e-06	single-codon
	CASP8	R	292	W:9|Q:4	13	386	2:202141586_9|2:202141587_4	headandneck:988:4|breast:2561:3|skin:974:2|uterus:618:1|unk:357:1|bladder:958:1|lymph:366:1	24592	pancan	4.27697e-06	single-codon
	TP53	P	152	L:28|T:2|S:2|R:2|P:2|Q:1|K:1	38	8466	17:7578475_32|17:7578476_4|17:7578474_2	bowel:1782:10|lung:2761:8|esophagusstomach:1407:3|bladder:958:3|pancreas:1059:3|cnsbrain:2270:3|headandneck:988:2|lymph:366:1|unk:357:1|breast:2561:1|softtissue:739:1|skin:974:1|prostate:1379:1	24592	pancan,bowel	4.46613e-06	single-codon
	STK11	splice	X307_splice	splice:8	8	448	19:1222983_3|19:1222982_3|19:1222006_2	lung:2761:8	24592	lung,pancan	4.63675e-06	single-codon
	RB1	R	552	*:13	13	884	13:48955538_13	esophagusstomach:1407:3|lung:2761:2|cnsbrain:2270:2|biliarytract:358:1|liver:636:1|bowel:1782:1|breast:2561:1|bladder:958:1|softtissue:739:1	24592	pancan	4.65061e-06	single-codon
	ARID1A	R	1335	*:12	12	1439	1:27100207_12	uterus:618:4|esophagusstomach:1407:2|bowel:1782:2|bladder:958:1|lung:2761:1|cnsbrain:2270:1|breast:2561:1	24592	pancan,uterus	4.97636e-06	single-codon
	MTOR	E	1799	K:12	12	939	1:11190804_12	bowel:1782:3|uterus:618:2|blood:890:1|breast:2561:1|lymph:366:1|prostate:1379:1|cnsbrain:2270:1|cervix:239:1|skin:974:1	24592	pancan	5.32869e-06	single-codon
	KMT2D	R	5179	H:5|L:2|C:2|P:1	10	2270	12:49420213_8|12:49420214_2	lung:2761:2|bladder:958:2|liver:636:1|thyroid:618:1|uterus:618:1|breast:2561:1|skin:974:1|esophagusstomach:1407:1	14256	pancan	5.54657e-06	single-codon
	EZH2	K	515	R:8	8	312	7:148512600_8	testis:217:3|cnsbrain:2270:2|softtissue:739:1|skin:974:1|thymus:162:1	24592	pancan,testis	5.87241e-06	single-codon
	ERBB3	M	91	I:12	12	696	12:56478817_12	bladder:958:9|headandneck:988:1|breast:2561:1|uterus:618:1	24592	bladder,pancan	5.89385e-06	single-codon
	PBRM1	R	1160	*:11|Q:1|P:1	13	681	3:52610695_11|3:52610694_2	kidney:1304:4|bowel:1782:3|uterus:618:3|prostate:1379:1|esophagusstomach:1407:1|skin:974:1	24592	pancan,kidney	6.01372e-06	single-codon
	SPOP	M	117	V:7	7	332	17:47696599_7	uterus:618:6|cervix:239:1	24592	uterus,pancan	6.8166e-06	single-codon
	PIK3CD	E	1021	K:8	8	340	1:9787030_8	lymph:366:4|skin:974:2|bladder:958:1|unk:357:1	24592	lymph,pancan	7.49933e-06	single-codon
	TP53	H	168	R:12|L:4|P:2|Y:1	19	8466	17:7578427_18|17:7578428_1	bowel:1782:5|lung:2761:4|esophagusstomach:1407:3|cnsbrain:2270:2|pancreas:1059:1|liver:636:1|bone:297:1|breast:2561:1|headandneck:988:1	24592	pancan,bowel	7.59679e-06	single-codon
	CCND3	I	290	K:3|R:1	4	77	6:41903688_4	lymph:366:4	24592	lymph,pancan	7.73195e-06	single-codon
	TP53	W	146	*:24|S:1|G:1|C:1	27	8466	17:7578492_16|17:7578493_10|17:7578494_1	lung:2761:4|cnsbrain:2270:4|skin:974:3|ovaryfallopiantube:699:3|esophagusstomach:1407:3|prostate:1379:2|uterus:618:2|breast:2561:2|bladder:958:2|pancreas:1059:1|bowel:1782:1	24592	pancan	8.41646e-06	single-codon
	TP53	R	267	W:15|P:8|L:5|Q:4|G:3|R:1	36	8466	17:7577139_18|17:7577138_16|17:7577137_2	lung:2761:10|cnsbrain:2270:8|bowel:1782:8|esophagusstomach:1407:2|liver:636:2|blood:890:1|ovaryfallopiantube:699:1|breast:2561:1|headandneck:988:1|kidney:1304:1|skin:974:1	24592	pancan,lung	8.41646e-06	single-codon
	TP53	A	161	T:12|D:7|S:4|V:2|P:1	26	8466	17:7578449_16|17:7578448_9|17:7578445_1	bladder:958:6|pancreas:1059:4|lung:2761:4|bowel:1782:3|breast:2561:3|headandneck:988:2|prostate:1379:1|ovaryfallopiantube:699:1|liver:636:1|cnsbrain:2270:1	24592	pancan,bladder	8.65977e-06	single-codon
	SMO	L	412	F:5|L:1	6	321	7:128846398_5|7:128846400_1	cnsbrain:2270:5|bladder:958:1	24592	cnsbrain	8.7101e-06	single-codon
	RB1	splice	X830_splice	splice:11	11	884	13:49039505_6|13:49047495_2|13:49047494_2|13:49039506_1	bladder:958:4|cnsbrain:2270:3|lung:2761:2|skin:974:1|uterus:618:1	24592	pancan	9.08044e-06	single-codon
	PIK3CA	E	365	K:11|V:2	13	2933	3:178922324_11|3:178922325_2	breast:2561:3|bladder:958:3|bowel:1782:2|uterus:618:2|cnsbrain:2270:1|headandneck:988:1|esophagusstomach:1407:1	24592	pancan	9.15584e-06	single-codon
	CTCF	R	448	*:8	8	360	16:67655479_8	uterus:618:6|headandneck:988:1|blood:890:1	24592	uterus,pancan	1.11848e-05	single-codon
	EP300	splice	X1429_splice	splice:6	6	871	22:41566408_4|22:41566409_1|22:41565621_1	kidney:1304:4|headandneck:988:1|lung:2761:1	24592	kidney,pancan	1.24478e-05	single-codon
	PRKCI	R	480	C:5|S:3|H:2	10	143	3:170013719_8|3:170013720_2	bowel:1782:6|esophagusstomach:1407:3|ovaryfallopiantube:699:1	14256	bowel,pancan	1.24955e-05	single-codon
	PIK3R2	G	373	R:9	9	254	19:18273784_9	uterus:618:3|breast:2561:1|bowel:1782:1|ampullaofvater:23:1|lung:2761:1|bladder:958:1|esophagusstomach:1407:1	24592	pancan,uterus	1.37717e-05	single-codon
	PIK3R2	D	557	Y:5|N:2|H:1|G:1	9	254	19:18278049_8|19:18278050_1	prostate:1379:2|breast:2561:2|bladder:958:1|testis:217:1|headandneck:988:1|uterus:618:1|lung:2761:1	24592	pancan	1.37717e-05	single-codon
	SMAD4	G	352	R:3|E:3|A:2|V:1|L:1|*:1	11	735	18:48591892_6|18:48591891_5	lung:2761:3|esophagusstomach:1407:3|bowel:1782:2|ampullaofvater:23:1|biliarytract:358:1|pancreas:1059:1	24592	pancan	1.37739e-05	single-codon
	PTPRT	E	548	K:11|G:1	12	1627	20:40980844_11|20:40980843_1	skin:974:11|ovaryfallopiantube:699:1	24592	skin,pancan	1.45349e-05	single-codon
	TP53	K	164	E:9|*:4	13	8466	17:7578440_13	lung:2761:5|bowel:1782:2|ovaryfallopiantube:699:2|bladder:958:1|esophagusstomach:1407:1|cnsbrain:2270:1|breast:2561:1	24592	pancan,lung	1.47224e-05	single-codon
	MET	F	1200	I:3|V:1	4	591	7:116422117_4	kidney:1304:4	24592	kidney	1.50401e-05	single-codon
	ERCC2	Y	72	C:4	4	355	19:45872219_4	bladder:958:4	24592	bladder,pancan	1.60862e-05	single-codon
	CTCF	Y	226	C:4	4	360	16:67645412_4	breast:2561:4	24592	breast,pancan	1.65504e-05	single-codon
	RHOA	E	47	K:11	11	262	3:49412884_11	bladder:958:8|softtissue:739:1|skin:974:1|headandneck:988:1	24592	bladder,pancan	1.69502e-05	single-codon
	APC	Q	1406	*:18|H:1	19	2141	5:112175507_18|5:112175509_1	bowel:1782:17|bladder:958:1|skin:974:1	24592	bowel	1.71142e-05	single-codon
	SMAD4	Q	534	*:9|P:1	10	735	18:48604778_9|18:48604779_1	esophagusstomach:1407:3|bowel:1782:2|pancreas:1059:2|lung:2761:2|unk:357:1	24592	pancan	1.79003e-05	single-codon
	ERBB2	L	869	R:4	4	726	17:37881414_4	breast:2561:4	24592	breast,pancan	1.83085e-05	single-codon
	STK11	S	216	F:11|S:1	12	448	19:1220629_11|19:1220630_1	lung:2761:8|skin:974:1|bladder:958:1|biliarytract:358:1|headandneck:988:1	24592	pancan,lung	1.94249e-05	single-codon
	KNSTRN	V	12	G:3|V:2	5	103	15:40675071_3|15:40675072_2	esophagusstomach:1407:4|lung:2761:1	14256	esophagusstomach,pancan	2.11448e-05	single-codon
	CTNNB1	I	35	S:7|I:1	8	800	3:41266107_7|3:41266108_1	liver:636:3|skin:974:2|uterus:618:2|lung:2761:1	24592	pancan,liver,uterus	2.12505e-05	single-codon
	TP53	Q	144	*:17|P:3|L:2|H:1	23	8466	17:7578500_17|17:7578499_4|17:7578498_2	lung:2761:12|headandneck:988:2|unk:357:1|bowel:1782:1|pancreas:1059:1|liver:636:1|ovaryfallopiantube:699:1|breast:2561:1|esophagusstomach:1407:1|uterus:618:1|bladder:958:1	24592	pancan,lung	2.17738e-05	single-codon
	MET	Y	1230	H:2|S:1|C:1	4	591	7:116423414_2|7:116423413_2	kidney:1304:4	24592	kidney	2.26527e-05	single-codon
	TP53	F	109	S:6|C:5|V:3|I:1|F:1	16	8466	17:7579361_11|17:7579362_4|17:7579359_1	skin:974:4|cnsbrain:2270:3|esophagusstomach:1407:2|ovaryfallopiantube:699:2|bowel:1782:2|lymph:366:1|softtissue:739:1|lung:2761:1	24592	pancan,skin	2.36567e-05	single-codon
	KIT	V	560	D:3|V:2|G:1|A:1	7	592	4:55593613_4|4:55593614_2|4:55593610_1	softtissue:739:4|testis:217:1|lung:2761:1|esophagusstomach:1407:1	24592	pancan,softtissue	2.52011e-05	single-codon
	TP53	G	105	C:13|V:6|D:4|S:2|R:2|G:1	28	8466	17:7579374_17|17:7579373_10|17:7579372_1	lung:2761:12|ovaryfallopiantube:699:4|headandneck:988:4|liver:636:1|esophagusstomach:1407:1|prostate:1379:1|testis:217:1|skin:974:1|bowel:1782:1|cnsbrain:2270:1|bladder:958:1	24592	pancan,lung	2.55615e-05	single-codon
	APC	Q	1338	*:17	17	2141	5:112175303_17	bowel:1782:16|prostate:1379:1	24592	bowel	2.62621e-05	single-codon
	SMAD4	E	330	K:6|Q:2|G:2|*:1	11	735	18:48591825_9|18:48591826_2	bowel:1782:4|esophagusstomach:1407:3|lung:2761:1|bladder:958:1|breast:2561:1|unk:357:1	24592	pancan,bowel	2.64652e-05	single-codon
	TP53	T	125	M:16|R:6|P:3|K:3|A:2	30	8466	17:7579313_25|17:7579314_5	bowel:1782:9|lung:2761:6|cnsbrain:2270:3|bladder:958:2|headandneck:988:2|breast:2561:2|skin:974:1|kidney:1304:1|thyroid:618:1|unk:357:1|ovaryfallopiantube:699:1|esophagusstomach:1407:1	24592	pancan,bowel	2.6955e-05	single-codon
	PTEN	G	127	R:5|E:5|V:3|*:1	14	1101	10:89692896_8|10:89692895_6	uterus:618:4|lung:2761:3|cnsbrain:2270:2|skin:974:1|testis:217:1|liver:636:1|esophagusstomach:1407:1|softtissue:739:1	24592	pancan,uterus	3.07056e-05	single-codon
	STK11	G	242	V:4|W:3|R:1|G:1	9	448	19:1220707_4|19:1220706_4|19:1220708_1	lung:2761:9	24592	lung,pancan	3.43165e-05	single-codon
	MYC	S	161	L:11	11	249	8:128750945_11	bowel:1782:3|headandneck:988:3|skin:974:2|uterus:618:1|ovaryfallopiantube:699:1|lung:2761:1	24592	pancan,bowel	3.61888e-05	single-codon
	KRAS	L	19	F:12	12	2885	12:25398262_12	lung:2761:3|bowel:1782:2|bladder:958:2|blood:890:1|unk:357:1|biliarytract:358:1|esophagusstomach:1407:1|lymph:366:1	24592	pancan	3.71801e-05	single-codon
	RB1	splice	X654_splice	splice:8	8	884	13:49030486_3|13:49033823_2|13:49033822_2|13:49030487_1	lung:2761:2|cnsbrain:2270:2|uterus:618:1|softtissue:739:1|bladder:958:1|skin:974:1	24592	pancan	3.72827e-05	single-codon
	PIK3CA	R	115	L:7|P:3|Q:1	11	2933	3:178916957_11	uterus:618:3|bowel:1782:2|headandneck:988:1|skin:974:1|thyroid:618:1|lung:2761:1|ovaryfallopiantube:699:1|bladder:958:1	24592	pancan	3.87074e-05	single-codon
	TP53	E	294	*:32	32	8466	17:7577058_32	lung:2761:9|esophagusstomach:1407:5|ovaryfallopiantube:699:4|breast:2561:3|pancreas:1059:3|bowel:1782:3|headandneck:988:3|bladder:958:2	24592	pancan,esophagusstomach	4.16264e-05	single-codon
	PREX2	L	50	V:5|L:4	9	827	8:68930087_9	esophagusstomach:1407:7|bowel:1782:2	14256	esophagusstomach,pancan	4.17096e-05	single-codon
	HIST1H3C	K	37	M:5|K:1	6	121	6:26045748_5|6:26045749_1	headandneck:988:4|bladder:958:1|skin:974:1	22029	headandneck	4.31461e-05	single-codon
	RHOA	Y	34	C:5|F:1	6	262	3:49412922_6	esophagusstomach:1407:4|bowel:1782:2	24592	pancan,esophagusstomach	4.70658e-05	single-codon
	SMARCA4	R	1243	W:9|P:1|L:1|G:1	12	1088	19:11144146_10|19:11144147_2	pancreas:1059:2|kidney:1304:2|lymph:366:1|uterus:618:1|cnsbrain:2270:1|biliarytract:358:1|ovaryfallopiantube:699:1|bone:297:1|breast:2561:1|esophagusstomach:1407:1	24592	pancan	4.81608e-05	single-codon
	RB1	splice	X445_splice	splice:7	7	884	13:48953728_5|13:48953729_2	lung:2761:4|cnsbrain:2270:1|liver:636:1|bladder:958:1	24592	pancan,lung	4.86029e-05	single-codon
	TP53	Q	167	*:19	19	8466	17:7578431_18|17:7578428_1	esophagusstomach:1407:3|lung:2761:3|breast:2561:2|bowel:1782:2|uterus:618:2|softtissue:739:2|headandneck:988:1|skin:974:1|biliarytract:358:1|cnsbrain:2270:1|bladder:958:1	24592	pancan	4.91726e-05	single-codon
	RHOA	L	57	V:6	6	262	3:49405969_6	esophagusstomach:1407:5|unk:357:1	24592	esophagusstomach,pancan	5.06876e-05	single-codon
	PTEN	splice	X268_splice	splice:12	12	1101	10:89720650_9|10:89720649_3	cnsbrain:2270:4|lung:2761:2|bowel:1782:2|breast:2561:2|skin:974:1|uterus:618:1	24592	pancan	5.16991e-05	single-codon
	VHL	D	121	Y:6|G:2|V:1	9	383	3:10188218_6|3:10188219_3	kidney:1304:9	24592	kidney,pancan	5.25111e-05	single-codon
	CDH1	splice	X177_splice	splice:6	6	556	16:68842472_3|16:68842471_3	esophagusstomach:1407:5|bowel:1782:1	24592	esophagusstomach,pancan	5.36416e-05	single-codon
	FBXW7	D	520	N:6|Y:2|V:1|H:1|G:1	11	795	4:153247244_9|4:153247243_2	bowel:1782:5|bladder:958:3|lung:2761:2|headandneck:988:1	24592	bowel,pancan	5.41988e-05	single-codon
	RUNX1	R	201	*:4|Q:2|G:1	7	264	21:36231783_5|21:36231782_2	blood:890:5|lung:2761:1|bowel:1782:1	24592	blood	5.5115e-05	single-codon
	VHL	W	88	*:5|R:2|L:2	9	383	3:10183794_7|3:10183793_2	kidney:1304:9	24592	kidney,pancan	5.74075e-05	single-codon
	PTEN	G	129	E:4|R:3|V:2|G:2|*:1	12	1101	10:89692902_6|10:89692901_4|10:89692903_2	uterus:618:5|cnsbrain:2270:2|lung:2761:2|breast:2561:1|softtissue:739:1|prostate:1379:1	24592	pancan,uterus	5.95071e-05	single-codon
	TP53	P	250	L:22|R:1|P:1	24	8466	17:7577532_22|17:7577531_2	lung:2761:5|bowel:1782:4|cnsbrain:2270:4|esophagusstomach:1407:3|ovaryfallopiantube:699:2|skin:974:1|unk:357:1|uterus:618:1|pancreas:1059:1|kidney:1304:1|biliarytract:358:1	24592	pancan	5.99198e-05	single-codon
	CDKN2A	L	130	Q:4|R:3|V:1	8	769	9:21970969_7|9:21970970_1	pancreas:1059:4|skin:974:3|esophagusstomach:1407:1	24592	pancan,pancreas,skin	6.02822e-05	single-codon
	CDKN2A	Y	129	*:6|C:3	9	769	9:21970971_6|9:21970972_3	lung:2761:3|headandneck:988:2|pancreas:1059:2|esophagusstomach:1407:1|biliarytract:358:1	24592	pancan	6.02822e-05	single-codon
	CDH1	splice	X440_splice	splice:7	7	556	16:68847399_5|16:68847400_2	esophagusstomach:1407:4|bladder:958:1|breast:2561:1|skin:974:1	24592	pancan,esophagusstomach	6.09866e-05	single-codon
	STK11	Q	220	*:9|P:1	10	448	19:1220640_9|19:1220641_1	lung:2761:7|thyroid:618:1|adrenalgland:291:1|esophagusstomach:1407:1	24592	pancan,lung	6.68914e-05	single-codon
	NOTCH2	R	2400	*:6	6	768	1:120458147_6	lymph:366:4|cnsbrain:2270:1|breast:2561:1	24592	lymph	7.27896e-05	single-codon
	EGFR	H	304	Y:5	5	1164	7:55223543_5	cnsbrain:2270:5	24592	cnsbrain	7.43525e-05	single-codon
	EGFR	T	363	I:4|A:2|N:1	7	1164	7:55224307_5|7:55224306_2	cnsbrain:2270:5|lymph:366:1|lung:2761:1	24592	cnsbrain,pancan	7.43525e-05	single-codon
	TP53	E	271	K:27|*:14|Q:7|V:5	53	8466	17:7577127_48|17:7577126_5	bladder:958:18|lung:2761:10|breast:2561:4|headandneck:988:4|prostate:1379:3|bowel:1782:3|esophagusstomach:1407:2|liver:636:1|skin:974:1|pancreas:1059:1|thyroid:618:1|unk:357:1|biliarytract:358:1|cnsbrain:2270:1|ovaryfallopiantube:699:1|cervix:239:1	24592	bladder,pancan	7.50412e-05	single-codon
	VHL	S	68	*:7|P:1	8	383	3:10183734_7|3:10183733_1	kidney:1304:8	24592	kidney,pancan	7.74714e-05	single-codon
	RHOA	E	40	Q:9|K:2|V:1|D:1|*:1	14	262	3:49412905_12|3:49412904_1|3:49412903_1	headandneck:988:6|unk:357:3|lung:2761:2|breast:2561:1|esophagusstomach:1407:1|bladder:958:1	24592	pancan,headandneck	7.89361e-05	single-codon
	VHL	L	158	V:4|P:3|Q:1|L:1	9	383	3:10191480_4|3:10191479_4|3:10191481_1	kidney:1304:9	24592	kidney,pancan	8.08917e-05	single-codon
	VHL	P	86	S:4|T:2|L:2|R:1	9	383	3:10183787_6|3:10183788_3	kidney:1304:9	24592	kidney,pancan	8.08917e-05	single-codon
	VHL	V	74	D:5|V:1|G:1	7	383	3:10183752_6|3:10183753_1	kidney:1304:7	24592	kidney,pancan	8.08917e-05	single-codon
	DICER1	D	1810	N:3|Y:2|V:2|H:1|A:1	9	609	14:95557639_6|14:95557638_3	uterus:618:4|bowel:1782:2|skin:974:1|lung:2761:1|thyroid:618:1	24592	uterus,pancan	8.2245e-05	single-codon
	PIK3CA	N	107	S:3|I:2|N:1	6	2933	3:178916933_4|3:178916934_1|3:178916930_1	breast:2561:2|prostate:1379:2|lung:2761:1|uterus:618:1	24592	pancan	8.25147e-05	single-codon
	ASXL2	E	330	K:7|Q:2|D:1	10	541	2:25978935_9|2:25978933_1	bladder:958:8|cnsbrain:2270:1|breast:2561:1	24592	bladder	9.42238e-05	single-codon
	PAK7	M	173	I:12	12	775	20:9561263_12	skin:974:11|unk:357:1	24592	skin	9.55413e-05	single-codon
	MAP2K2	F	57	L:4|V:2	6	162	19:4117551_3|19:4117549_3	skin:974:2|pancreas:1059:1|breast:2561:1|esophagusstomach:1407:1|headandneck:988:1	24592	pancan	9.70235e-05	single-codon
	IRF4	K	123	R:3	3	262	6:394972_3	blood:890:3	24592	blood	9.97106e-05	single-codon
	PIM1	S	97	N:4|S:3|R:2|T:1	10	283	6:37138951_5|6:37138950_5	lymph:366:9|blood:890:1	24592	lymph,pancan	0.000100262	single-codon
	APC	E	1353	*:15	15	2141	5:112175348_15	bowel:1782:15	24592	bowel	0.000102563	single-codon
	PBRM1	R	710	*:10|G:1	11	681	3:52643768_11	biliarytract:358:2|bowel:1782:2|kidney:1304:2|cnsbrain:2270:1|penis:6:1|skin:974:1|uterus:618:1|prostate:1379:1	24592	pancan	0.000109398	single-codon
	RUNX1	R	162	G:2|S:1|K:1	4	264	21:36252878_2|21:36252877_1|21:36252876_1	blood:890:4	24592	blood	0.000113108	single-codon
	B2M	L	12	P:4|Q:2|L:1	7	189	15:45003779_6|15:45003780_1	lymph:366:3|lung:2761:1|unk:357:1|bowel:1782:1|esophagusstomach:1407:1	24592	pancan,lymph	0.000115092	single-codon
	TP53	splice	X32_splice	splice:20	20	8466	17:7579699_19|17:7579698_1	headandneck:988:4|cnsbrain:2270:4|kidney:1304:3|liver:636:2|lung:2761:2|prostate:1379:1|bladder:958:1|bowel:1782:1|testis:217:1|skin:974:1	24592	pancan,headandneck	0.00012754	single-codon
	SUZ12	R	101	*:5|Q:1	6	177	17:30267331_5|17:30267332_1	prostate:1379:4|bowel:1782:1|uterus:618:1	24592	prostate	0.000127919	single-codon
	KEAP1	R	260	Q:4|L:4|*:2	10	641	19:10602799_8|19:10602800_2	lung:2761:4|liver:636:2|kidney:1304:2|thyroid:618:1|cervix:239:1	24592	pancan	0.000128688	single-codon
	MTOR	C	1483	Y:2|R:2|F:2|W:1	7	939	1:11217230_4|1:11217231_2|1:11217229_1	kidney:1304:4|breast:2561:1|testis:217:1|cnsbrain:2270:1	24592	pancan,kidney	0.000130996	single-codon
	EGFR	P	596	L:4|S:2|R:1|P:1	8	1164	7:55233037_5|7:55233036_2|7:55233038_1	cnsbrain:2270:6|skin:974:1|bowel:1782:1	24592	cnsbrain,pancan	0.000132911	single-codon
	EIF1AX	G	15	D:4|G:2|V:1	7	127	X:20156713_5|X:20156712_2	cnsbrain:2270:2|eye:128:2|bowel:1782:1|lung:2761:1|softtissue:739:1	24592	pancan	0.00013328	single-codon
	MTOR	V	2006	F:4|V:1|L:1|I:1	7	939	1:11188078_6|1:11188076_1	kidney:1304:3|cnsbrain:2270:2|lymph:366:1|uterus:618:1	24592	pancan,kidney	0.00014343	single-codon
	ERBB3	T	355	I:4|P:1|A:1	6	696	12:56482607_4|12:56482606_2	breast:2561:2|biliarytract:358:1|bowel:1782:1|esophagusstomach:1407:1|bladder:958:1	24592	pancan	0.000144623	single-codon
	NRAS	G	60	G:5|V:1|E:1	7	620	1:115256531_3|1:115256532_2|1:115256530_2	skin:974:3|lung:2761:3|bowel:1782:1	24592	pancan,skin	0.000146135	single-codon
	XPO1	R	749	Q:10|*:1	11	317	2:61715367_10|2:61715368_1	bowel:1782:4|uterus:618:4|unk:357:1|breast:2561:1|pancreas:1059:1	24592	pancan	0.000146532	single-codon
	NOTCH1	F	853	I:2|C:2	4	1130	9:139405634_2|9:139405633_2	lung:2761:4	24592	lung,pancan	0.00015082	single-codon
	EIF1AX	R	13	L:4|H:4|C:2|P:1|G:1	12	127	X:20156719_9|X:20156720_3	cnsbrain:2270:3|uterus:618:3|esophagusstomach:1407:1|eye:128:1|skin:974:1|lung:2761:1|bowel:1782:1|prostate:1379:1	24592	pancan	0.000161842	single-codon
	RB1	splice	X127_splice	splice:7	7	884	13:48916852_3|13:48919214_2|13:48916851_2	lung:2761:4|liver:636:1|unk:357:1|cnsbrain:2270:1	24592	pancan,lung	0.000170188	single-codon
	RB1	R	579	*:11	11	884	13:49027168_10|13:49027167_1	skin:974:3|unk:357:2|lung:2761:2|bladder:958:1|prostate:1379:1|eye:128:1|headandneck:988:1	24592	pancan	0.000170188	single-codon
	PIM1	G	28	D:6|V:1|A:1	8	283	6:37138549_8	lymph:366:8	24592	lymph,pancan	0.00017151	single-codon
	SF3B1	G	740	E:7|V:2	9	638	2:198266713_8|2:198266712_1	lung:2761:4|bladder:958:2|blood:890:1|pancreas:1059:1|biliarytract:358:1	24592	pancan,lung	0.000175436	single-codon
	SPOP	F	125	L:3|V:1|I:1|C:1	6	332	17:47696450_3|17:47696448_2|17:47696449_1	prostate:1379:6	24592	prostate	0.000178222	single-codon
	KDM6A	splice	X1336_splice	splice:6	6	612	X:44969323_4|X:44969322_2	bladder:958:5|blood:890:1	24592	bladder,pancan	0.000181209	single-codon
	ATRX	R	1426	*:11|R:1	12	1098	X:76909629_11|X:76909627_1	cnsbrain:2270:8|uterus:618:3|esophagusstomach:1407:1	24592	cnsbrain,pancan	0.000182976	single-codon
	RB1	splice	X203_splice	splice:9	9	884	13:48923160_5|13:48934152_4	bladder:958:1|esophagusstomach:1407:1|liver:636:1|lung:2761:1|skin:974:1|uterus:618:1|softtissue:739:1|unk:357:1|biliarytract:358:1	24592	pancan	0.000197457	single-codon
	TP53	V	172	F:12|D:5|G:1	18	8466	17:7578416_12|17:7578415_6	lung:2761:7|esophagusstomach:1407:3|lymph:366:1|unk:357:1|thyroid:618:1|bowel:1782:1|biliarytract:358:1|cnsbrain:2270:1|breast:2561:1|headandneck:988:1	24592	pancan,lung	0.000199169	single-codon
	ERBB2	G	776	V:4|S:2	6	726	17:37880998_4|17:37880997_2	esophagusstomach:1407:3|bowel:1782:2|bladder:958:1	24592	pancan,esophagusstomach	0.000214743	single-codon
	CTCF	H	284	Y:4|P:1|N:1	6	360	16:67645922_5|16:67645923_1	breast:2561:6	24592	breast	0.00021698	single-codon
	SMAD4	E	526	K:3|*:3|Q:2|V:1|D:1|A:1	11	735	18:48604754_8|18:48604755_2|18:48604756_1	bowel:1782:3|lung:2761:3|biliarytract:358:2|pancreas:1059:1|breast:2561:1|esophagusstomach:1407:1	24592	pancan	0.000220507	single-codon
	SMAD4	D	355	G:4|V:2|Y:1	7	735	18:48591901_6|18:48591900_1	bowel:1782:3|pancreas:1059:2|esophagusstomach:1407:1|prostate:1379:1	24592	pancan	0.000220507	single-codon
	ERCC2	S	246	Y:3|S:2|F:2	7	355	19:45867571_4|19:45867570_3	bladder:958:6|softtissue:739:1	24592	bladder,pancan	0.000220631	single-codon
	IRF4	C	99	R:4|C:2|Y:1	7	262	6:394899_4|6:394901_2|6:394900_1	lymph:366:4|headandneck:988:1|pancreas:1059:1|lung:2761:1	24592	lymph,pancan	0.000227653	single-codon
	FGFR2	R	203	H:4|C:2	6	458	10:123310820_4|10:123310821_2	bowel:1782:6	24592	bowel	0.000229895	single-codon
	STAT3	S	614	R:5	5	262	17:40475068_3|17:40475070_2	lymph:366:4|esophagusstomach:1407:1	22029	lymph,pancan	0.000238844	single-codon
	CIC	R	201	W:6|R:1	7	713	19:42791715_6|19:42791717_1	cnsbrain:2270:5|lymph:366:1|esophagusstomach:1407:1	24592	cnsbrain,pancan	0.00025673	single-codon
	PDGFRA	E	229	K:5|V:1|*:1	7	690	4:55131142_6|4:55131143_1	cnsbrain:2270:5|skin:974:2	24592	cnsbrain	0.000257939	single-codon
	FOXO1	S	22	W:3|P:3|S:1	7	212	13:41240286_3|13:41240285_3|13:41240284_1	lymph:366:4|bowel:1782:2|prostate:1379:1	22029	lymph,pancan	0.000262159	single-codon
	ERBB2	V	659	V:2|E:2|D:1	5	726	17:37879601_3|17:37879602_2	lung:2761:4|esophagusstomach:1407:1	24592	lung,pancan	0.000268823	single-codon
	MAP2K1	C	121	S:5|C:1	6	240	15:66729153_3|15:66729154_2|15:66729155_1	lung:2761:2|lymph:366:1|bladder:958:1|biliarytract:358:1|esophagusstomach:1407:1	24592	pancan	0.000271001	single-codon
	TP53	T	155	N:8|P:7|I:2|T:1	18	8466	17:7578466_10|17:7578467_7|17:7578465_1	lung:2761:7|cnsbrain:2270:5|breast:2561:3|liver:636:1|pancreas:1059:1|softtissue:739:1	24592	pancan,lung,cnsbrain	0.000276204	single-codon
	PTPRD	S	431	L:15|S:1|*:1	17	1590	9:8518099_16|9:8518098_1	uterus:618:5|skin:974:4|bowel:1782:3|prostate:1379:1|penis:6:1|lung:2761:1|cnsbrain:2270:1|esophagusstomach:1407:1	24592	pancan,uterus	0.000280826	single-codon
	CASP8	R	127	Q:8|*:5	13	386	2:202131412_8|2:202131411_5	uterus:618:5|bladder:958:2|bowel:1782:2|headandneck:988:2|pancreas:1059:1|breast:2561:1	24592	pancan	0.000302849	single-codon
	RNF43	H	86	Y:2|R:2	4	397	17:56448391_2|17:56448390_2	esophagusstomach:1407:4	24592	esophagusstomach	0.000317636	single-codon
	BRAF	L	485	W:3|S:1|F:1|*:1	6	1450	7:140477854_5|7:140477853_1	bladder:958:2|skin:974:2|lung:2761:1|biliarytract:358:1	24592	pancan,bladder	0.000333434	single-codon
	BCL2	A	131	D:7|T:2|V:1	10	255	18:60985508_8|18:60985509_2	lymph:366:9|cnsbrain:2270:1	24592	lymph,pancan	0.000338355	single-codon
	STK11	splice	X288_splice	splice:8	8	448	19:1221946_3|19:1221340_3|19:1221947_2	lung:2761:6|esophagusstomach:1407:1|cnsbrain:2270:1	24592	pancan,lung	0.000339167	single-codon
	CTNNB1	W	383	R:3|S:1|G:1|C:1	6	800	3:41274897_4|3:41274899_1|3:41274898_1	bowel:1782:3|liver:636:2|pancreas:1059:1	24592	pancan,bowel	0.000347387	single-codon
	PTEN	A	126	S:4|V:3|D:3|G:1	11	1101	10:89692893_7|10:89692892_4	breast:2561:4|esophagusstomach:1407:2|uterus:618:2|unk:357:1|softtissue:739:1|cnsbrain:2270:1	24592	pancan,breast	0.000355422	single-codon
	PTEN	C	105	Y:2|W:1|S:1|R:1|G:1|*:1	7	1101	10:89692829_3|10:89692831_2|10:89692830_2	skin:974:3|cnsbrain:2270:3|softtissue:739:1	24592	pancan,skin	0.00036399	single-codon
	TGFBR2	D	471	N:10|Y:1|V:1	12	388	3:30715678_11|3:30715679_1	bowel:1782:4|pancreas:1059:3|lung:2761:2|uterus:618:1|cervix:239:1|esophagusstomach:1407:1	24592	pancan	0.000365084	single-codon
	PTEN	C	124	S:4|Y:2|R:1|G:1	8	1101	10:89692886_5|10:89692887_3	breast:2561:4|thyroid:618:1|bowel:1782:1|prostate:1379:1|uterus:618:1	24592	pancan,breast	0.00036946	single-codon
	PTPRT	L	668	V:3|L:2	5	1627	20:40944500_5	esophagusstomach:1407:5	24592	esophagusstomach	0.000383122	single-codon
	RAC1	N	111	K:3|S:1|I:1	5	157	7:6439807_3|7:6439806_2	blood:890:1|bowel:1782:1|thyroid:618:1|softtissue:739:1|skin:974:1	24592	pancan	0.0003846	single-codon
	GATA2	C	352	R:1|F:1|C:1|*:1	4	209	3:128200749_2|3:128200751_1|3:128200750_1	lung:2761:4	24592	lung	0.000386131	single-codon
	MAP2K1	Y	130	C:3|N:1|H:1	5	240	15:66729181_3|15:66729180_2	lymph:366:2|lung:2761:1|bowel:1782:1|liver:636:1	24592	pancan	0.000390931	single-codon
	TP53	W	53	*:22	22	8466	17:7579529_12|17:7579528_10	pancreas:1059:4|lung:2761:4|skin:974:3|bowel:1782:2|ovaryfallopiantube:699:2|biliarytract:358:2|cnsbrain:2270:1|esophagusstomach:1407:1|softtissue:739:1|breast:2561:1|bladder:958:1	24592	pancan	0.000393306	single-codon
	TP53	Q	331	*:39|H:8	47	8466	17:7576855_39|17:7576853_8	lung:2761:12|bladder:958:9|breast:2561:6|headandneck:988:5|skin:974:4|bowel:1782:3|ovaryfallopiantube:699:2|pancreas:1059:1|esophagusstomach:1407:1|biliarytract:358:1|thyroid:618:1|uterus:618:1|cnsbrain:2270:1	24592	pancan,lung	0.000393306	single-codon
	NFE2L2	D	77	G:3|H:2|Y:1|V:1	7	385	2:178098815_4|2:178098816_3	lung:2761:2|liver:636:2|skin:974:1|kidney:1304:1|cervix:239:1	24592	pancan	0.000440113	single-codon
	EGFR	T	263	P:3|I:1	4	1164	7:55221743_3|7:55221744_1	cnsbrain:2270:4	24592	cnsbrain	0.000443937	single-codon
	MTOR	M	2327	I:5|V:1	6	939	1:11177096_5|1:11177098_1	kidney:1304:2|uterus:618:1|bladder:958:1|bowel:1782:1|cnsbrain:2270:1	24592	pancan	0.000446236	single-codon
	DNMT1	E	51	K:5	5	510	19:10291528_5	uterus:618:5	24592	uterus	0.000457369	single-codon
	SETD2	Y	1666	C:4|H:1|*:1	6	904	3:47142966_4|3:47142967_1|3:47142965_1	lung:2761:2|kidney:1304:2|bone:297:1|pancreas:1059:1	24592	pancan	0.000460067	single-codon
	RHOA	G	62	R:3|E:3|V:1	7	262	3:49405953_4|3:49405954_3	esophagusstomach:1407:4|bowel:1782:1|breast:2561:1|headandneck:988:1	24592	pancan,esophagusstomach	0.000460204	single-codon
	RB1	splice	X46_splice	splice:7	7	884	13:48881414_3|13:48878187_2|13:48881415_1|13:48878186_1	lung:2761:4|prostate:1379:1|bladder:958:1|uterus:618:1	24592	pancan	0.000467624	single-codon
	BRAF	G	596	R:4|V:1|S:1|D:1|C:1	8	1450	7:140453149_6|7:140453148_2	lung:2761:5|bladder:958:1|blood:890:1|cnsbrain:2270:1	24592	pancan,lung	0.000495017	single-codon
	EP300	C	1164	Y:5|S:1	6	871	22:41553402_6	bladder:958:3|headandneck:988:2|bone:297:1	24592	pancan,bladder	0.000497503	single-codon
	PTEN	R	335	*:12|P:1|G:1	14	1101	10:89720852_13|10:89720853_1	cnsbrain:2270:4|uterus:618:3|headandneck:988:2|bowel:1782:2|unk:357:1|lymph:366:1|bladder:958:1	24592	pancan	0.000501374	single-codon
	FGFR2	Y	375	C:5	5	458	10:123274794_5	uterus:618:2|biliarytract:358:1|bowel:1782:1|cervix:239:1	24592	pancan,uterus	0.000502673	single-codon
	MST1	G	673	S:6	6	178	3:49721622_6	lymph:366:2|ovaryfallopiantube:699:1|lung:2761:1|headandneck:988:1|breast:2561:1	22029	pancan	0.000504583	single-codon
	MAP2K1	T	386	T:3	3	240	15:66782929_3	bladder:958:3	24592	bladder,pancan	0.000512968	single-codon
	MAP3K1	S	1330	L:8|W:2	10	476	5:56181765_10	breast:2561:2|bowel:1782:2|esophagusstomach:1407:2|unk:357:1|uterus:618:1|ovaryfallopiantube:699:1|cnsbrain:2270:1	24592	pancan	0.000515914	single-codon
	FOXA1	S	250	F:5|Y:1	6	317	14:38061240_6	breast:2561:6	24592	breast	0.000517134	single-codon
	SMAD4	W	524	C:6|S:1|R:1|L:1	9	735	18:48604750_6|18:48604749_2|18:48604748_1	pancreas:1059:3|bowel:1782:2|esophagusstomach:1407:2|breast:2561:1|lung:2761:1	24592	pancan	0.000523514	single-codon
	TP53	L	257	Q:7|R:4|P:4|V:1|L:1	17	8466	17:7577511_15|17:7577512_1|17:7577510_1	bowel:1782:6|prostate:1379:3|bladder:958:2|uterus:618:1|unk:357:1|breast:2561:1|pancreas:1059:1|ovaryfallopiantube:699:1|liver:636:1	24592	pancan,bowel	0.000534068	single-codon
	STK11	splice	X97_splice	splice:8	8	448	19:1218415_3|19:1207203_2|19:1218414_1|19:1207204_1|19:1207201_1	lung:2761:6|unk:357:1|esophagusstomach:1407:1	24592	pancan,lung	0.000549664	single-codon
	VHL	R	161	*:7|Q:2|L:1	10	383	3:10191488_7|3:10191489_3	kidney:1304:7|breast:2561:1|esophagusstomach:1407:1|adrenalgland:291:1	24592	pancan,kidney	0.000554685	single-codon
	KEAP1	R	470	C:7|H:2|S:1	10	641	19:10600447_8|19:10600446_2	lung:2761:7|headandneck:988:2|skin:974:1	24592	pancan,lung	0.000575238	single-codon
	ARAF	P	216	L:3|R:1	4	235	X:47426127_4	biliarytract:358:3|softtissue:739:1	24592	biliarytract	0.000593516	single-codon
	GNAQ	R	183	Q:6|*:4	10	206	9:80412493_6|9:80412494_4	eye:128:4|bowel:1782:3|skin:974:1|penis:6:1|pancreas:1059:1	24592	eye,pancan	0.000622969	single-codon
	RB1	splice	X702_splice	splice:6	6	884	13:49033971_3|13:49033970_3	bladder:958:2|eye:128:1|softtissue:739:1|lung:2761:1|headandneck:988:1	24592	pancan	0.000627863	single-codon
	EP300	H	1451	R:1|Q:1|P:1|L:1|H:1	5	871	22:41566475_3|22:41566476_2	bladder:958:1|lung:2761:1|uterus:618:1|breast:2561:1|cnsbrain:2270:1	24592	pancan	0.000628378	single-codon
	PTEN	G	165	E:6|R:5|*:1	12	1101	10:89711876_6|10:89711875_6	cnsbrain:2270:3|uterus:618:3|lung:2761:2|kidney:1304:1|blood:890:1|bowel:1782:1|skin:974:1	24592	pancan	0.000639515	single-codon
	PTEN	splice	X85_splice	splice:8	8	1101	10:89690847_6|10:89692768_1|10:89690848_1	cnsbrain:2270:3|prostate:1379:2|uterus:618:1|unk:357:1|cervix:239:1	24592	pancan	0.000639515	single-codon
	RHOA	T	37	I:4|S:1|A:1	6	262	3:49412913_4|3:49412914_2	bowel:1782:3|thyroid:618:1|lymph:366:1|headandneck:988:1	24592	pancan,bowel	0.000650689	single-codon
	SMAD4	C	363	R:2|F:2|Y:1|S:1	6	735	18:48591925_4|18:48591924_2	esophagusstomach:1407:2|lung:2761:1|breast:2561:1|bowel:1782:1|bladder:958:1	24592	pancan	0.000651642	single-codon
	RAC1	G	12	V:3|R:3	6	157	7:6414401_3|7:6414400_3	testis:217:4|unk:357:2	24592	testis,pancan	0.0006614	single-codon
	ARID1A	R	1722	*:10	10	1439	1:27105553_10	uterus:618:4|bowel:1782:3|biliarytract:358:1|esophagusstomach:1407:1|lung:2761:1	24592	pancan,uterus	0.000675573	single-codon
	FOXO1	S	205	S:2|N:2|Y:1	5	212	13:41239736_3|13:41239735_2	lymph:366:4|bowel:1782:1	22029	lymph	0.00070081	single-codon
	KRAS	A	11	A:6|T:2	8	2885	12:25398285_4|12:25398288_2|12:25398286_2	lung:2761:4|pancreas:1059:3|vulvavagina:16:1	24592	pancan,lung	0.000725139	single-codon
	APC	E	1408	*:13	13	2141	5:112175513_13	bowel:1782:13	24592	bowel	0.000733407	single-codon
	GSK3B	splice	X239_splice	splice:3	3	180	3:119624701_3	kidney:1304:3	24592	kidney	0.000748705	single-codon
	RB1	splice	X605_splice	splice:7	7	884	13:49027248_4|13:49027249_2|13:49030339_1	lung:2761:2|bladder:958:2|prostate:1379:1|breast:2561:1|cnsbrain:2270:1	24592	pancan	0.000771125	single-codon
	CIC	S	231	N:2|I:1|G:1	4	713	19:42791806_3|19:42791805_1	cnsbrain:2270:4	24592	cnsbrain	0.000799846	single-codon
	FAT1	R	1627	*:7|Q:5	12	1811	4:187542861_7|4:187542860_5	uterus:618:4|headandneck:988:3|bowel:1782:2|skin:974:1|esophagusstomach:1407:1|pancreas:1059:1	24592	pancan	0.000802594	single-codon
	SOCS1	A	3	T:3|R:1|P:1|E:1	6	110	16:11349329_4|16:11349328_2	lymph:366:6	24592	lymph,pancan	0.000842047	single-codon
	AKT1	Q	79	K:6	6	310	14:105243048_6	breast:2561:2|prostate:1379:2|uterus:618:2	24592	pancan	0.000879322	single-codon
	FBXW7	R	278	*:10	10	795	4:153258983_10	bowel:1782:6|esophagusstomach:1407:2|cnsbrain:2270:1|bladder:958:1	24592	pancan,bowel	0.000882677	single-codon
	PTEN	Q	171	*:13|R:2|K:1	16	1101	10:89711893_14|10:89711894_2	breast:2561:3|lung:2761:3|esophagusstomach:1407:2|headandneck:988:2|cnsbrain:2270:1|uterus:618:1|prostate:1379:1|bladder:958:1|liver:636:1|cervix:239:1	24592	pancan	0.000888705	single-codon
	VHL	I	151	T:2|N:2|S:1|F:1	6	383	3:10188309_5|3:10188308_1	kidney:1304:6	24592	kidney,pancan	0.000898334	single-codon
	U2AF1	I	24	T:4|V:1	5	192	21:44524486_4|21:44524487_1	pancreas:1059:1|unk:357:1|uterus:618:1|adrenalgland:291:1|esophagusstomach:1407:1	24592	pancan	0.000965908	single-codon
	BCL2	K	22	K:8|R:1|*:1	10	255	18:60985834_8|18:60985836_1|18:60985835_1	lymph:366:9|headandneck:988:1	24592	pancan,lymph	0.00096647	single-codon
	PIK3CA	M	1004	I:8|V:1	9	2933	3:178951957_8|3:178951955_1	breast:2561:3|uterus:618:2|headandneck:988:1|lung:2761:1|bowel:1782:1|bladder:958:1	24592	pancan	0.000967542	single-codon
	ASXL2	M	1	T:5|I:1	6	541	2:26101090_5|2:26101089_1	bowel:1782:3|esophagusstomach:1407:2|skin:974:1	24592	pancan,bowel	0.000968287	single-codon
	ALK	F	1245	I:2|V:1	3	896	2:29436860_3	cnsbrain:2270:3	24592	cnsbrain	0.000975062	single-codon
	PTEN	Y	155	C:4|H:1	5	1101	10:89692980_4|10:89692979_1	uterus:618:4|biliarytract:358:1	24592	pancan,uterus	0.00100345	single-codon
	HNF1A	G	288	G:3	3	306	12:121432117_3	lymph:366:3	24592	lymph	0.00100776	single-codon
	FBXW7	R	224	Q:5|*:5	10	795	4:153268138_5|4:153268137_5	bowel:1782:3|uterus:618:3|thyroid:618:1|penis:6:1|lung:2761:1|cervix:239:1	24592	pancan	0.00102351	single-codon
	TP53	N	131	I:8|S:3|N:1|K:1	13	8466	17:7578538_11|17:7578537_2	lung:2761:6|pancreas:1059:2|liver:636:1|skin:974:1|prostate:1379:1|bowel:1782:1|cnsbrain:2270:1	24592	pancan,lung	0.00103632	single-codon
	TP53	L	265	P:8|L:6|R:4|M:1	19	8466	17:7577144_12|17:7577143_4|17:7577142_2|17:7577145_1	headandneck:988:3|cnsbrain:2270:3|pancreas:1059:2|bowel:1782:2|prostate:1379:2|unk:357:2|breast:2561:2|ovaryfallopiantube:699:1|lung:2761:1|bladder:958:1	24592	pancan	0.00103632	single-codon
	CUL3	M	299	R:4|V:1	5	300	2:225371708_4|2:225371709_1	prostate:1379:3|cnsbrain:2270:1|esophagusstomach:1407:1	24592	prostate,pancan	0.00104497	single-codon
	TP53	Q	192	*:43|L:1|H:1	45	8466	17:7578275_43|17:7578274_1|17:7578272_1	lung:2761:8|bladder:958:8|breast:2561:5|headandneck:988:5|ovaryfallopiantube:699:5|pancreas:1059:3|bowel:1782:2|thyroid:618:2|esophagusstomach:1407:2|unk:357:1|uterus:618:1|skin:974:1|biliarytract:358:1|liver:636:1	24592	pancan	0.0010669	single-codon
	CHEK2	R	346	C:3|S:2|G:2|H:1	8	251	22:29092948_7|22:29092947_1	lung:2761:3|headandneck:988:1|softtissue:739:1|bowel:1782:1|ovaryfallopiantube:699:1|breast:2561:1	24592	pancan	0.00106947	single-codon
	PIK3CA	E	39	K:5|G:1	6	2933	3:178916728_5|3:178916729_1	uterus:618:4|breast:2561:1|cnsbrain:2270:1	24592	uterus,pancan	0.00110112	single-codon
	STK11	H	174	H:2|Y:1|R:1|L:1|D:1	6	448	19:1220429_2|19:1220428_2|19:1220427_2	lung:2761:3|kidney:1304:3	24592	kidney,pancan	0.0011452	single-codon
	EGFR	A	750	P:2|A:2	4	1164	7:55242480_2|7:55242478_2	lung:2761:4	24592	lung	0.00114854	single-codon
	FBXW7	T	532	P:2|I:1	3	795	4:153247208_2|4:153247207_1	bladder:958:3	24592	bladder,pancan	0.00116715	single-codon
	CREBBP	D	1435	G:3|Y:2|N:2|H:2	9	1199	16:3788651_6|16:3788650_3	bladder:958:4|lung:2761:3|lymph:366:1|ovaryfallopiantube:699:1	24592	pancan	0.001175	single-codon
	SRSF2	P	95	L:3|H:2|R:1	6	101	17:74732959_6	blood:890:3|lymph:366:1|skin:974:1|esophagusstomach:1407:1	22029	blood,pancan	0.00121973	single-codon
	VHL	C	162	Y:3|R:2|W:1|F:1|*:1	8	383	3:10191492_4|3:10191493_2|3:10191491_2	kidney:1304:7|pancreas:1059:1	24592	kidney,pancan	0.00122944	single-codon
	CARD11	K	215	T:3|N:1|M:1	5	854	7:2983886_4|7:2983885_1	lymph:366:4|uterus:618:1	24592	lymph	0.00131617	single-codon
	DIS3	R	780	T:2|K:2|S:1|G:1	6	314	13:73336064_4|13:73336065_1|13:73336063_1	blood:890:4|thyroid:618:1|kidney:1304:1	24592	blood,pancan	0.00133003	single-codon
	PDPK1	P	499	S:3|L:2	5	68	16:2647217_3|16:2647218_2	skin:974:5	24592	skin	0.00133637	single-codon
	ARID1A	R	1461	*:9|Q:1	10	1439	1:27101099_9|1:27101100_1	esophagusstomach:1407:3|bowel:1782:2|uterus:618:1|skin:974:1|prostate:1379:1|lymph:366:1|headandneck:988:1	24592	pancan	0.00133954	single-codon
	PIK3CA	C	604	R:5	5	2933	3:178937422_5	uterus:618:2|bowel:1782:1|pancreas:1059:1|headandneck:988:1	24592	pancan	0.00134822	single-codon
	FOXA1	Y	259	S:2|C:2|F:1	5	317	14:38061213_5	prostate:1379:2|breast:2561:2|skin:974:1	24592	pancan	0.00135085	single-codon
	TP53	E	198	*:26	26	8466	17:7578257_26	lung:2761:8|esophagusstomach:1407:5|breast:2561:3|bowel:1782:3|ovaryfallopiantube:699:2|bladder:958:1|liver:636:1|uterus:618:1|pancreas:1059:1|prostate:1379:1	24592	pancan,esophagusstomach	0.00141364	single-codon
	PTEN	splice	X342_splice	splice:8	8	1101	10:89720876_5|10:89720877_3	cnsbrain:2270:5|skin:974:2|uterus:618:1	24592	pancan,cnsbrain	0.0014285	single-codon
	STK11	N	181	Y:1|T:1|S:1|I:1	4	448	19:1220449_3|19:1220448_1	lung:2761:4	24592	lung,pancan	0.00160517	single-codon
	PTEN	M	35	I:4|V:3|L:1	8	1101	10:89653807_4|10:89653805_4	cnsbrain:2270:3|bowel:1782:2|biliarytract:358:1|lung:2761:1|kidney:1304:1	24592	pancan	0.0016887	single-codon
	MYC	T	73	I:3|P:2|A:1	6	249	8:128750681_3|8:128750680_3	lymph:366:3|esophagusstomach:1407:1|lung:2761:1|cnsbrain:2270:1	24592	pancan	0.00170415	single-codon
	CDH1	D	288	V:4|N:1	5	556	16:68845617_4|16:68845616_1	esophagusstomach:1407:4|breast:2561:1	24592	esophagusstomach	0.00177361	single-codon
	DNMT3B	V	229	V:3|M:3|L:1	7	381	20:31376690_4|20:31376692_3	lung:2761:4|breast:2561:2|uterus:618:1	24592	lung,pancan	0.0018413	single-codon
	ERCC2	Y	14	C:3	3	355	19:45873455_3	bladder:958:3	24592	bladder,pancan	0.00185832	single-codon
	FOXP1	R	514	H:6|C:3	9	341	3:71021817_6|3:71021818_3	bowel:1782:4|bladder:958:3|softtissue:739:1|breast:2561:1	24592	pancan,bladder	0.00189104	single-codon
	KRAS	Q	22	K:5|H:1	6	2885	12:25398255_5|12:25398253_1	bowel:1782:3|lung:2761:1|blood:890:1|lymph:366:1	24592	pancan,bowel	0.00191302	single-codon
	RICTOR	S	1101	L:9|S:1	10	493	5:38950648_9|5:38950647_1	skin:974:4|uterus:618:2|penis:6:1|ovaryfallopiantube:699:1|unk:357:1|cnsbrain:2270:1	24592	pancan	0.0019806	single-codon
	PTPRT	L	695	F:6|L:2|R:1	9	1627	20:40944419_6|20:40944417_2|20:40944418_1	skin:974:8|bowel:1782:1	24592	skin	0.00202693	single-codon
	TP53	G	262	V:17	17	8466	17:7577153_17	uterus:618:4|ovaryfallopiantube:699:3|breast:2561:2|lung:2761:2|skin:974:1|bowel:1782:1|prostate:1379:1|lymph:366:1|headandneck:988:1|esophagusstomach:1407:1	24592	pancan,uterus	0.00203377	single-codon
	EIF1AX	G	6	D:4|S:1|R:1|C:1	7	127	X:20156740_4|X:20159743_3	lung:2761:2|eye:128:2|unk:357:1|softtissue:739:1|thymus:162:1	24592	pancan	0.00204928	single-codon
	PTEN	S	170	N:6|I:1|G:1	8	1101	10:89711891_7|10:89711890_1	cnsbrain:2270:4|lung:2761:1|ovaryfallopiantube:699:1|kidney:1304:1|uterus:618:1	24592	pancan	0.00205793	single-codon
	FOXA1	S	242	C:3|Y:1|F:1	5	317	14:38061261_3|14:38061264_2	breast:2561:5	24592	breast	0.00206253	single-codon
	DNAJB1	L	190	L:4	4	88	19:14627500_4	prostate:1379:1|cnsbrain:2270:1|headandneck:988:1|lymph:366:1	22029	pancan	0.00208705	single-codon
	TP53	F	113	V:6|C:6|S:2|P:1|L:1|F:1	17	8466	17:7579349_8|17:7579350_6|17:7579348_3	breast:2561:7|bowel:1782:2|esophagusstomach:1407:2|lung:2761:1|prostate:1379:1|lymph:366:1|skin:974:1|liver:636:1|cnsbrain:2270:1	24592	pancan,breast	0.00211656	single-codon
	RAD50	D	69	Y:4|N:2	6	358	5:131895051_6	lung:2761:4|bowel:1782:1|bladder:958:1	24592	lung	0.0021273	single-codon
	GNAS	R	160	C:7|P:1|H:1	9	515	20:57480483_7|20:57480484_2	bowel:1782:2|esophagusstomach:1407:2|pancreas:1059:1|prostate:1379:1|uterus:618:1|breast:2561:1|lung:2761:1	24592	pancan	0.00218412	single-codon
	FGFR4	N	535	K:3	3	352	5:176522416_3	breast:2561:3	24592	breast	0.00224498	single-codon
	PPP6C	S	270	L:7	7	144	9:127912061_7	skin:974:6|headandneck:988:1	22029	skin	0.00226807	single-codon
	PIK3CA	P	471	L:5|A:2	7	2933	3:178928226_5|3:178928225_2	breast:2561:1|skin:974:1|bowel:1782:1|uterus:618:1|bladder:958:1|liver:636:1|cnsbrain:2270:1	24592	pancan	0.00229108	single-codon
	CREBBP	Y	1450	N:2|D:2|C:1	5	1199	16:3788606_4|16:3788605_1	lymph:366:2|headandneck:988:2|lung:2761:1	24592	pancan	0.00236926	single-codon
	RB1	splice	X89_splice	splice:8	8	884	13:48916734_6|13:48916733_2	lung:2761:7|cnsbrain:2270:1	24592	lung,pancan	0.00238217	single-codon
	KMT2D	L	1375	L:2|I:1	3	2270	12:49442448_2|12:49442450_1	kidney:1304:3	14256	kidney	0.00240633	single-codon
	ERCC2	P	463	L:4|S:1|Q:1	6	355	19:45860619_5|19:45860620_1	bladder:958:4|kidney:1304:1|liver:636:1	24592	bladder,pancan	0.00240751	single-codon
	APC	E	1379	*:11	11	2141	5:112175426_11	bowel:1782:11	24592	bowel	0.00245822	single-codon
	CYSLTR2	L	129	Q:3	3	98	13:49281339_3	eye:128:3	14256	eye	0.00248881	single-codon
	IL7R	I	241	V:2|M:1|L:1|F:1	5	423	5:35874565_4|5:35874567_1	lung:2761:5	24592	lung	0.00254943	single-codon
	SMARCA4	R	1135	W:5|Q:4	9	1088	19:11141426_5|19:11141427_4	bladder:958:3|cnsbrain:2270:2|esophagusstomach:1407:2|lymph:366:1|headandneck:988:1	24592	pancan	0.00257749	single-codon
	KEAP1	G	480	W:7|V:1|G:1	9	641	19:10600417_7|19:10600416_1|19:10600415_1	lung:2761:8|skin:974:1	24592	lung,pancan	0.00262222	single-codon
	VHL	G	114	A:4|R:2|C:1	7	383	3:10188198_4|3:10183871_3	kidney:1304:7	24592	kidney,pancan	0.00271531	single-codon
	KMT2D	R	1903	*:4|R:1	5	2270	12:49436599_4|12:49436597_1	bladder:958:4|bowel:1782:1	14256	bladder	0.0027384	single-codon
	MAP3K1	L	380	S:3	3	476	5:56161270_3	breast:2561:3	24592	breast	0.00275841	single-codon
	PDGFRA	N	659	K:4|Y:1|S:1	6	690	4:55144148_4|4:55144147_1|4:55144146_1	cnsbrain:2270:4|softtissue:739:2	24592	cnsbrain,softtissue,pancan	0.0027827	single-codon
	ERCC2	D	609	E:2|G:1	3	355	19:45856345_2|19:45856346_1	bladder:958:3	24592	bladder	0.0028127	single-codon
	ERCC2	E	606	Q:4|G:2	6	355	19:45856356_4|19:45856355_2	bladder:958:5|prostate:1379:1	24592	bladder,pancan	0.0028127	single-codon
	BCL10	L	174	*:3	3	70	1:85733491_3	lymph:366:3	22029	lymph	0.00283328	single-codon
	PIK3CA	D	939	G:4	4	2933	3:178948044_4	uterus:618:2|breast:2561:2	24592	pancan	0.00289243	single-codon
	MAP2K1	Q	56	P:5	5	240	15:66727451_5	lung:2761:2|bowel:1782:2|uterus:618:1	24592	pancan	0.00292307	single-codon
	CDH1	splice	X722_splice	splice:4	4	556	16:68862076_4	breast:2561:4	24592	breast	0.00296597	single-codon
	CDH1	R	335	*:6|Q:1	7	556	16:68845757_6|16:68845758_1	breast:2561:5|esophagusstomach:1407:1|bowel:1782:1	24592	breast,pancan	0.00296597	single-codon
	CIC	N	205	S:3	3	713	19:42791728_3	cnsbrain:2270:3	24592	cnsbrain	0.00300209	single-codon
	KDM6A	splice	X1293_splice	splice:5	5	612	X:44966653_2|X:44966654_1|X:44950111_1|X:44950110_1	bladder:958:2|skin:974:1|lung:2761:1|esophagusstomach:1407:1	24592	pancan	0.00305903	single-codon
	SOX17	A	96	G:4	4	302	8:55370985_4	uterus:618:3|cervix:239:1	24592	uterus	0.00310588	single-codon
	SMAD4	L	536	P:2|R:1|Q:1	4	735	18:48604785_4	pancreas:1059:2|bowel:1782:2	24592	pancan	0.00311074	single-codon
	PIK3CA	T	1052	K:5	5	2933	3:178952100_5	bowel:1782:2|esophagusstomach:1407:2|liver:636:1	24592	pancan	0.00312237	single-codon
	PTEN	Y	178	*:3|H:1|C:1	5	1101	10:89711916_3|10:89711915_1|10:89711914_1	skin:974:2|cnsbrain:2270:2|lung:2761:1	24592	pancan	0.0033597	single-codon
	KEAP1	M	110	V:3|I:3	6	641	19:10610382_3|19:10610380_3	lung:2761:6	24592	lung,pancan	0.0033807	single-codon
	KEAP1	R	272	C:3|P:2|H:2|L:1	8	641	19:10602763_5|19:10602764_3	lung:2761:7|headandneck:988:1	24592	lung,pancan	0.0033807	single-codon
	NF1	R	1241	*:7	7	1352	17:29562641_7	skin:974:6|uterus:618:1	24592	skin	0.00343576	single-codon
	GATA3	R	364	T:2|S:2|G:1	5	336	10:8115746_2|10:8115745_2|10:8115744_1	breast:2561:5	24592	breast	0.00354741	single-codon
	JUN	E	112	K:5|Q:2	7	104	1:59248409_7	bladder:958:4|lung:2761:2|breast:2561:1	24592	bladder,pancan	0.00366249	single-codon
	CTCF	S	354	F:9|Y:1	10	360	16:67650756_10	bladder:958:3|skin:974:3|biliarytract:358:1|blood:890:1|uterus:618:1|headandneck:988:1	24592	pancan	0.00367326	single-codon
	RB1	R	455	*:9	9	884	13:48953760_9	uterus:618:2|unk:357:1|cnsbrain:2270:1|softtissue:739:1|prostate:1379:1|breast:2561:1|skin:974:1|bladder:958:1	24592	pancan	0.00379432	single-codon
	ALK	R	401	*:9|Q:1|L:1	11	896	2:29606679_9|2:29606678_2	bowel:1782:6|uterus:618:1|skin:974:1|lung:2761:1|bladder:958:1|headandneck:988:1	24592	bowel,pancan	0.00380995	single-codon
	ARID2	R	314	C:8|S:1	9	858	12:46230691_9	skin:974:6|pancreas:1059:1|unk:357:1|bowel:1782:1	24592	skin	0.00383083	single-codon
	MED12	V	1223	L:2|V:1	3	834	X:70349255_2|X:70349257_1	prostate:1379:3	24592	prostate	0.00387331	single-codon
	KLF4	K	409	Q:5|N:2	7	189	9:110249348_5|9:110249346_2	pancreas:1059:2|breast:2561:2|cnsbrain:2270:1|prostate:1379:1|bladder:958:1	24592	pancan,pancreas	0.00402158	single-codon
	STK11	E	165	*:6|Q:2|K:1	9	448	19:1220400_9	lung:2761:6|breast:2561:2|unk:357:1	24592	pancan,lung	0.00404179	single-codon
	AKT3	E	17	K:9|*:1	10	240	1:243859016_10	skin:974:3|softtissue:739:2|cnsbrain:2270:1|prostate:1379:1|bladder:958:1|penis:6:1|kidney:1304:1	24592	pancan	0.00407836	single-codon
	CARD11	L	251	P:3	3	854	7:2979495_3	lymph:366:3	24592	lymph	0.00409188	single-codon
	STK11	P	221	L:6|S:1|P:1	8	448	19:1220644_6|19:1220645_1|19:1220643_1	lung:2761:2|bowel:1782:1|breast:2561:1|bladder:958:1|unk:357:1|kidney:1304:1|esophagusstomach:1407:1	24592	pancan	0.00419616	single-codon
	TP53	L	111	P:7|R:6|Q:4|M:1	18	8466	17:7579355_17|17:7579356_1	liver:636:3|breast:2561:3|cnsbrain:2270:2|esophagusstomach:1407:2|lung:2761:2|blood:890:1|skin:974:1|bowel:1782:1|adrenalgland:291:1|prostate:1379:1|bladder:958:1	24592	pancan	0.0042015	single-codon
	TP53	Q	104	*:22|H:1	23	8466	17:7579377_22|17:7579375_1	lung:2761:9|esophagusstomach:1407:3|bowel:1782:3|skin:974:2|uterus:618:1|softtissue:739:1|ovaryfallopiantube:699:1|pancreas:1059:1|headandneck:988:1|biliarytract:358:1	24592	pancan	0.00440345	single-codon
	SESN2	I	425	V:2	2	86	1:28605669_2	bladder:958:2	14256	bladder	0.00451586	single-codon
	MAP2K4	S	184	L:7|W:1|S:1	9	263	17:12011144_8|17:12011145_1	breast:2561:6|headandneck:988:1|cnsbrain:2270:1|esophagusstomach:1407:1	24592	breast,pancan	0.00461638	single-codon
	SMARCA4	R	973	W:5|Q:5	10	1088	19:11134252_5|19:11134251_5	lymph:366:3|bowel:1782:2|esophagusstomach:1407:2|uterus:618:1|thymus:162:1|cervix:239:1	24592	pancan,lymph	0.00471444	single-codon
	ERBB2	G	660	D:3|R:1|G:1	5	726	17:37879604_3|17:37879605_1|17:37879603_1	bladder:958:3|uterus:618:1|cervix:239:1	24592	pancan,bladder	0.0049302	single-codon
	NCOA3	R	80	C:2|H:1	3	465	20:46252809_2|20:46252810_1	bladder:958:3	22029	bladder	0.00503088	single-codon
	FOXA1	D	226	N:5|G:4	9	317	14:38061313_5|14:38061312_4	breast:2561:5|prostate:1379:3|bladder:958:1	24592	breast,pancan,prostate	0.00504815	single-codon
	FOXP1	splice	X511_splice	splice:11	11	341	3:71021828_11	breast:2561:5|bladder:958:4|lung:2761:2	24592	breast,pancan	0.00505681	single-codon
	PIK3R1	K	379	N:2|E:2	4	396	5:67589149_2|5:67589147_2	cnsbrain:2270:3|softtissue:739:1	24592	cnsbrain,pancan	0.00512804	single-codon
	ERBB2	R	103	Q:6	6	726	17:37864656_6	bladder:958:5|pancreas:1059:1	24592	bladder	0.00522898	single-codon
	PIM1	K	24	N:4|K:3	7	283	6:37138423_7	lymph:366:7	24592	lymph,pancan	0.00528608	single-codon
	PTEN	D	24	G:3|V:2|H:2|E:2|N:1	10	1101	10:89624297_5|10:89624296_3|10:89624298_2	breast:2561:2|kidney:1304:2|uterus:618:2|esophagusstomach:1407:2|thyroid:618:1|softtissue:739:1	24592	pancan	0.00530938	single-codon
	KRAS	D	33	E:4	4	2885	12:25398220_4	bowel:1782:2|testis:217:1|lung:2761:1	24592	pancan	0.00545511	single-codon
	PTEN	Y	336	*:7	7	1101	10:89720857_7	cnsbrain:2270:2|uterus:618:2|breast:2561:1|headandneck:988:1|prostate:1379:1	24592	pancan	0.00550228	single-codon
	PTEN	P	38	S:7|L:3|F:1	11	1101	10:89653814_8|10:89653815_3	skin:974:9|kidney:1304:1|uterus:618:1	24592	skin	0.00565129	single-codon
	AXL	A	273	V:3|P:1	4	407	19:41743883_3|19:41743882_1	bladder:958:3|bowel:1782:1	24592	bladder	0.005756	single-codon
	KDR	R	1032	Q:8|*:4	12	883	4:55956220_8|4:55956221_4	skin:974:5|bowel:1782:3|unk:357:1|uterus:618:1|cnsbrain:2270:1|prostate:1379:1	24592	pancan	0.00584924	single-codon
	KDR	S	1037	S:6|L:4|T:1	11	883	4:55956204_6|4:55956205_4|4:55956206_1	skin:974:4|bowel:1782:2|esophagusstomach:1407:1|lung:2761:1|thyroid:618:1|cnsbrain:2270:1|pancreas:1059:1	24592	pancan	0.00584924	single-codon
	TP53	D	259	Y:19|V:7|N:2|H:2|D:1	31	8466	17:7577506_23|17:7577505_7|17:7577504_1	bladder:958:5|lung:2761:5|bowel:1782:5|ovaryfallopiantube:699:4|pancreas:1059:3|biliarytract:358:2|headandneck:988:2|adrenalgland:291:1|kidney:1304:1|skin:974:1|liver:636:1|softtissue:739:1	24592	pancan	0.00592808	single-codon
	GNA11	R	183	C:5|R:1|H:1	7	195	19:3115012_5|19:3115014_1|19:3115013_1	skin:974:2|breast:2561:1|prostate:1379:1|lung:2761:1|adrenalgland:291:1|eye:128:1	24592	pancan	0.0059591	single-codon
	CDKN2A	P	48	L:10|R:2	12	769	9:21974684_12	skin:974:6|pancreas:1059:2|softtissue:739:1|cnsbrain:2270:1|headandneck:988:1|esophagusstomach:1407:1	24592	pancan,skin	0.00610554	single-codon
	RB1	splice	X776_splice	splice:6	6	884	13:49039340_3|13:49039339_3	lung:2761:2|bladder:958:1|bowel:1782:1|pancreas:1059:1|prostate:1379:1	24592	pancan	0.00618941	single-codon
	DIS3	D	479	Y:2|V:1|H:1|G:1	5	314	13:73346365_3|13:73346364_2	lung:2761:4|breast:2561:1	24592	lung	0.00626224	single-codon
	KMT2D	R	2685	*:7|R:1	8	2270	12:49433394_8	bladder:958:3|cnsbrain:2270:1|skin:974:1|lung:2761:1|cervix:239:1|bowel:1782:1	14256	pancan	0.0062878	single-codon
	RB1	R	467	*:9	9	884	13:48954198_9	uterus:618:2|prostate:1379:1|breast:2561:1|cnsbrain:2270:1|bladder:958:1|bowel:1782:1|esophagusstomach:1407:1|skin:974:1	24592	pancan	0.00629917	single-codon
	PIK3CA	H	1065	Y:4|L:1	5	2933	3:178952138_4|3:178952139_1	lung:2761:1|bowel:1782:1|kidney:1304:1|bladder:958:1|breast:2561:1	24592	pancan	0.00632322	single-codon
	PIK3R1	D	560	G:3|Y:2|H:2|N:1	8	396	5:67591085_5|5:67591086_3	cnsbrain:2270:3|headandneck:988:1|lung:2761:1|breast:2561:1|bowel:1782:1|lymph:366:1	24592	pancan,cnsbrain	0.00650809	single-codon
	MGA	R	1242	*:9	9	886	15:42021428_9	skin:974:3|bladder:958:2|uterus:618:2|breast:2561:1|bowel:1782:1	22029	pancan	0.00652467	single-codon
	TP63	E	609	K:11	11	665	3:189612073_11	skin:974:9|unk:357:1|uterus:618:1	24592	skin	0.00654116	single-codon
	TP53	I	251	N:5|F:5|S:3|M:1|I:1	15	8466	17:7577529_7|17:7577530_5|17:7577528_3	ovaryfallopiantube:699:3|headandneck:988:3|pancreas:1059:2|softtissue:739:1|breast:2561:1|esophagusstomach:1407:1|lung:2761:1|prostate:1379:1|bowel:1782:1|skin:974:1	24592	pancan	0.0065547	single-codon
	PIK3CA	G	364	R:5|A:1	6	2933	3:178922321_5|3:178922322_1	bowel:1782:2|breast:2561:1|lung:2761:1|bladder:958:1|uterus:618:1	24592	pancan	0.00666202	single-codon
	CDKN2A	N	42	H:2|Y:1|K:1|I:1	5	769	9:21974703_3|9:21974702_1|9:21974701_1	esophagusstomach:1407:1|unk:357:1|lung:2761:1|headandneck:988:1|pancreas:1059:1	24592	pancan	0.00666274	single-codon
	DIS3	R	689	Q:8|G:1	9	314	13:73337650_8|13:73337651_1	bowel:1782:5|blood:890:1|uterus:618:1|breast:2561:1|prostate:1379:1	24592	pancan,bowel	0.00674087	single-codon
	DIS3	L	767	F:4	4	314	13:73336102_4	lung:2761:1|cnsbrain:2270:1|liver:636:1|bladder:958:1	24592	pancan	0.00674087	single-codon
	DIS3	R	382	Q:8|G:1	9	314	13:73347916_8|13:73347917_1	bowel:1782:3|uterus:618:2|bladder:958:1|thyroid:618:1|prostate:1379:1|esophagusstomach:1407:1	24592	pancan	0.00674087	single-codon
	HIST1H3B	E	51	K:4|Q:3|E:3|D:2	12	227	6:26032138_7|6:26032136_5	lung:2761:3|skin:974:2|breast:2561:2|bladder:958:2|unk:357:1|ovaryfallopiantube:699:1|esophagusstomach:1407:1	24592	pancan	0.00676671	single-codon
	PTEN	Y	16	*:3|Y:1|D:1	5	1101	10:89624274_4|10:89624272_1	uterus:618:2|lung:2761:1|cnsbrain:2270:1|bowel:1782:1	24592	pancan	0.00677821	single-codon
	GLI1	R	380	Q:6|R:1|*:1	8	457	12:57861838_6|12:57861837_2	bowel:1782:5|lung:2761:2|uterus:618:1	22029	bowel	0.00678357	single-codon
	ATM	L	2890	P:2|V:1|R:1|I:1	5	1291	11:108218090_3|11:108218089_1|11:108218088_1	bladder:958:1|unk:357:1|skin:974:1|lung:2761:1|esophagusstomach:1407:1	24592	pancan	0.00687296	single-codon
	JAK1	L	910	S:1|P:1|L:1	3	414	1:65305399_2|1:65305400_1	liver:636:3	24592	liver	0.00697986	single-codon
	EGFR	L	838	M:2|P:1	3	1164	7:55259454_2|7:55259455_1	kidney:1304:3	24592	kidney	0.00715263	single-codon
	RAC1	Q	61	R:2|K:2	4	157	7:6431629_2|7:6431628_2	unk:357:2|testis:217:1|prostate:1379:1	24592	pancan	0.00720141	single-codon
	EIF1AX	P	2	L:4|S:2|P:1	7	127	X:20159754_3|X:20159755_2|X:20159753_2	unk:357:2|eye:128:1|softtissue:739:1|lung:2761:1|uterus:618:1|skin:974:1	24592	pancan	0.00725427	single-codon
	CASP8	R	491	*:9|Q:1	10	386	2:202150030_9|2:202150031_1	bowel:1782:3|headandneck:988:3|cervix:239:1|bladder:958:1|pancreas:1059:1|skin:974:1	24592	pancan	0.00730592	single-codon
	VHL	H	115	N:4|Y:2|Q:1	7	383	3:10188200_6|3:10188202_1	kidney:1304:7	24592	kidney,pancan	0.00743192	single-codon
	MAP2K4	splice	X297_splice	splice:6	6	263	17:12028690_3|17:12028689_3	breast:2561:3|thyroid:618:1|lung:2761:1|esophagusstomach:1407:1	24592	pancan,breast	0.00744286	single-codon
	MAP2K4	R	134	W:9|Q:1|L:1	11	263	17:11998898_9|17:11998899_2	bowel:1782:4|breast:2561:3|pancreas:1059:2|lung:2761:1|prostate:1379:1	24592	pancan	0.00744286	single-codon
	BCL6	R	618	C:6|H:1	7	287	3:187442854_6|3:187442853_1	skin:974:3|bowel:1782:2|lung:2761:1|breast:2561:1	24592	pancan	0.00748624	single-codon
	ERBB2	D	277	Y:4|H:2|V:1|G:1	8	726	17:37866662_6|17:37866663_2	bladder:958:6|bowel:1782:1|lung:2761:1	24592	bladder	0.00753449	single-codon
	PTEN	Y	346	D:2|*:2|H:1|C:1	6	1101	10:89725053_3|10:89725055_2|10:89725054_1	cnsbrain:2270:2|kidney:1304:1|breast:2561:1|lung:2761:1|bowel:1782:1	24592	pancan	0.00758645	single-codon
	PTEN	Y	177	*:2|F:1|D:1|C:1	5	1101	10:89711913_2|10:89711912_2|10:89711911_1	skin:974:2|thyroid:618:1|cnsbrain:2270:1|bladder:958:1	24592	pancan	0.00758645	single-codon
	B2M	L	7	*:3|S:2	5	189	15:45003764_5	lymph:366:3|skin:974:2	24592	pancan,skin,lymph	0.00770415	single-codon
	FBXW7	E	287	V:2|Q:2|D:2|K:1	7	795	4:153258956_3|4:153258955_2|4:153258954_2	lung:2761:2|bowel:1782:2|esophagusstomach:1407:2|ovaryfallopiantube:699:1	24592	pancan	0.00774127	single-codon
	STK11	K	84	*:4	4	448	19:1207162_4	pancreas:1059:1|thyroid:618:1|breast:2561:1|lung:2761:1	24592	pancan	0.00790318	single-codon
	FOXL2	E	118	K:6|Q:1	7	141	3:138665213_7	lung:2761:2|bladder:958:2|skin:974:1|breast:2561:1|cervix:239:1	24592	pancan	0.00808299	single-codon
	APC	R	213	*:51	51	2141	5:112116592_51	bowel:1782:50|thyroid:618:1	24592	bowel	0.00809179	single-codon
	APC	Q	1303	*:10	10	2141	5:112175198_10	bowel:1782:10	24592	bowel	0.008287	single-codon
	APC	Q	1294	*:7	7	2141	5:112175171_7	bowel:1782:7	24592	bowel	0.008287	single-codon
	APC	Q	1328	*:8	8	2141	5:112175273_8	bowel:1782:7|uterus:618:1	24592	bowel	0.008287	single-codon
	EGFR	K	754	K:1|I:1|E:1	3	1164	7:55242492_1|7:55242491_1|7:55242490_1	lung:2761:3	24592	lung	0.00841608	single-codon
	TP63	S	365	L:7|S:3|*:2	12	665	3:189586470_9|3:189586471_3	skin:974:5|bowel:1782:1|lung:2761:1|pancreas:1059:1|prostate:1379:1|kidney:1304:1|cnsbrain:2270:1|testis:217:1	24592	pancan	0.00847836	single-codon
	EPHB1	R	743	W:4|Q:3|R:2	9	778	3:134920412_4|3:134920413_3|3:134920414_2	skin:974:6|cnsbrain:2270:1|prostate:1379:1|esophagusstomach:1407:1	24592	skin	0.00851534	single-codon
	PTPN11	N	308	D:2|S:1	3	298	12:112915523_2|12:112915524_1	cnsbrain:2270:3	24592	cnsbrain	0.00866741	single-codon
	PTPN11	F	285	S:3|V:1	4	298	12:112915455_3|12:112910844_1	cnsbrain:2270:3|blood:890:1	24592	cnsbrain,pancan	0.00866741	single-codon
	PIK3CA	C	90	Y:1|S:1|R:1|G:1	4	2933	3:178916882_2|3:178916881_2	cnsbrain:2270:2|bladder:958:1|cervix:239:1	24592	pancan	0.00868121	single-codon
	SF3B1	D	894	N:2|G:2|Y:1|A:1	6	638	2:198265477_3|2:198265476_3	blood:890:3|skin:974:2|kidney:1304:1	24592	blood,pancan	0.00868423	single-codon
	RB1	R	787	*:9|Q:2	11	884	13:49039374_8|13:49039375_2|13:49039373_1	uterus:618:3|skin:974:2|bladder:958:1|bowel:1782:1|ovaryfallopiantube:699:1|cervix:239:1|softtissue:739:1|prostate:1379:1	24592	pancan	0.00888303	single-codon
	SDHA	V	644	M:6|L:1	7	275	5:256470_7	lymph:366:3|lung:2761:2|cnsbrain:2270:1|headandneck:988:1	24592	pancan,lymph	0.00891411	single-codon
	PIM1	Q	37	H:3|Q:2	5	283	6:37138577_5	lymph:366:5	24592	lymph,pancan	0.00912236	single-codon
	CIC	W	238	*:2|R:1	3	713	19:42791828_2|19:42791826_1	cnsbrain:2270:3	24592	cnsbrain	0.00939319	single-codon
	RIT1	M	90	I:11	11	95	1:155874261_11	bladder:958:4|lung:2761:3|breast:2561:1|biliarytract:358:1|blood:890:1|cervix:239:1	24592	pancan	0.00949363	single-codon
	ERBB2	T	862	A:4	4	726	17:37881392_4	bladder:958:2|breast:2561:1|esophagusstomach:1407:1	24592	pancan	0.00960996	single-codon
	SMAD4	D	493	N:3|G:2|H:1|A:1	7	735	18:48604655_4|18:48604656_3	lung:2761:3|bowel:1782:2|prostate:1379:1|biliarytract:358:1	24592	pancan	0.00966195	single-codon
	MTOR	A	1971	T:4|S:1|P:1	6	939	1:11188183_6	blood:890:1|liver:636:1|bladder:958:1|kidney:1304:1|prostate:1379:1|cnsbrain:2270:1	24592	pancan	0.00966714	single-codon
	HLA-B	E	69	A:3|K:2	5	121	6:31324602_3|6:31324603_2	lymph:366:4|bowel:1782:1	14256	lymph	0.00998842	single-codon
	PTEN	W	111	*:6|S:1|R:1|G:1	9	1101	10:89692849_4|10:89692848_3|10:89692847_2	lung:2761:2|thyroid:618:1|uterus:618:1|skin:974:1|cnsbrain:2270:1|lymph:366:1|bowel:1782:1|prostate:1379:1	24592	pancan	0.010044	single-codon
	PTEN	C	71	Y:5|F:1|*:1	7	1101	10:89690805_6|10:89690806_1	cnsbrain:2270:5|uterus:618:1|kidney:1304:1	24592	pancan,cnsbrain	0.010044	single-codon
	TNFRSF14	M	1	I:2|T:1|K:1	4	106	1:2488106_2|1:2488105_2	lymph:366:4	24592	lymph	0.0100656	single-codon
	RB1	R	445	*:10	10	884	13:48953730_10	cnsbrain:2270:3|lung:2761:2|softtissue:739:2|biliarytract:358:1|esophagusstomach:1407:1|bladder:958:1	24592	pancan	0.0101373	single-codon
	HIST1H3B	E	106	K:8|Q:5|E:1	14	227	6:26031973_13|6:26031971_1	lung:2761:6|skin:974:4|breast:2561:1|bladder:958:1|prostate:1379:1|headandneck:988:1	24592	pancan,lung	0.0101928	single-codon
	EGFR	L	833	V:2|F:2|M:1	5	1164	7:55259439_3|7:55259441_2	lung:2761:4|breast:2561:1	24592	lung	0.0101972	single-codon
	FOXO1	T	24	I:2|M:1	3	212	13:41240279_2|13:41240278_1	lymph:366:3	22029	lymph	0.0102244	single-codon
	CDKN2A	S	12	*:8|L:4	12	769	9:21974792_12	bladder:958:4|lung:2761:3|breast:2561:2|thymus:162:1|skin:974:1|unk:357:1	24592	pancan	0.0102315	single-codon
	EP300	splice	X1539_splice	splice:5	5	871	22:41568668_5	esophagusstomach:1407:2|bowel:1782:1|bladder:958:1|lung:2761:1	24592	pancan	0.0102559	single-codon
	CREBBP	W	1502	C:3|R:1|L:1|*:1	6	1199	16:3786705_3|16:3786706_2|16:3786707_1	lymph:366:3|bladder:958:2|lung:2761:1	24592	lymph,pancan	0.0102806	single-codon
	ERBB3	F	219	L:4|C:1	5	696	12:56481620_3|12:56481622_1|12:56481621_1	bladder:958:1|esophagusstomach:1407:1|uterus:618:1|headandneck:988:1|cervix:239:1	24592	pancan	0.010341	single-codon
	HLA-A	L	180	L:7	7	206	6:29911239_7	bowel:1782:5|lymph:366:2	22029	bowel	0.0104832	single-codon
	CTNNB1	K	292	E:3|T:1	4	800	3:41267290_3|3:41267291_1	lung:2761:1|biliarytract:358:1|bowel:1782:1|skin:974:1	24592	pancan	0.0105287	single-codon
	FOXP1	S	448	L:8|S:2	10	341	3:71026984_8|3:71026983_2	skin:974:5|bowel:1782:4|uterus:618:1	24592	pancan,skin	0.0106174	single-codon
	MTOR	L	1460	P:4	4	939	1:11217299_4	kidney:1304:3|thyroid:618:1	24592	kidney	0.0109745	single-codon
	RNF43	R	371	*:9	9	397	17:56436026_9	pancreas:1059:5|bowel:1782:2|biliarytract:358:1|esophagusstomach:1407:1	24592	pancreas,pancan	0.0109769	single-codon
	KDM6A	G	526	V:1|G:1|E:1|*:1	4	612	X:44922716_2|X:44922717_1|X:44922715_1	kidney:1304:3|headandneck:988:1	24592	kidney	0.0113278	single-codon
	ATM	R	1466	*:4|Q:3|P:2	9	1291	11:108160489_5|11:108160488_4	bowel:1782:3|bladder:958:3|blood:890:1|lung:2761:1|esophagusstomach:1407:1	24592	pancan	0.011401	single-codon
	CARD11	D	357	V:3|N:1	4	854	7:2977614_3|7:2977615_1	lymph:366:3|lung:2761:1	24592	lymph	0.0114333	single-codon
	PRDM14	F	204	F:5|V:1	6	216	8:70981484_5|8:70981486_1	skin:974:5|esophagusstomach:1407:1	14256	skin	0.0115138	single-codon
	IGF1R	G	129	R:1|G:1|A:1	3	522	15:99251083_1|15:99251082_1|15:99251081_1	breast:2561:3	24592	breast	0.0115248	single-codon
	ERBB4	K	1002	T:5|R:1	6	1157	2:212285296_6	esophagusstomach:1407:5|bowel:1782:1	24592	esophagusstomach	0.0116021	single-codon
	ERBB4	K	1223	T:3|R:2|M:1	6	1157	2:212248599_6	esophagusstomach:1407:5|bowel:1782:1	24592	esophagusstomach	0.0116021	single-codon
	SMO	W	535	L:3	3	321	7:128850341_3	cnsbrain:2270:3	24592	cnsbrain	0.0116504	single-codon
	GPS2	splice	X242_splice	splice:2	2	102	17:7216697_1|17:7216612_1	liver:636:2	22029	liver	0.0118955	single-codon
	NSD1	F	392	F:7	7	840	5:176631233_7	bowel:1782:5|uterus:618:2	24592	bowel	0.0119255	single-codon
	RARA	F	286	S:2|I:1|C:1	4	178	17:38510603_3|17:38510602_1	lung:2761:2|skin:974:1|breast:2561:1	24592	pancan	0.0121888	single-codon
	FBXW7	R	14	Q:6|*:3	9	795	4:153332915_6|4:153332916_3	bowel:1782:4|uterus:618:2|bladder:958:2|esophagusstomach:1407:1	24592	pancan	0.0122075	single-codon
	FBXW7	G	437	V:3|G:1|E:1|*:1	6	795	4:153249468_4|4:153249469_1|4:153249467_1	bladder:958:1|esophagusstomach:1407:1|bowel:1782:1|uterus:618:1|blood:890:1|lung:2761:1	24592	pancan	0.0122075	single-codon
	TP53	D	208	V:7|N:2|G:2|E:1	12	8466	17:7578226_9|17:7578227_2|17:7578225_1	breast:2561:4|lung:2761:3|cnsbrain:2270:2|uterus:618:1|ovaryfallopiantube:699:1|bladder:958:1	24592	breast	0.0123251	single-codon
	PIK3CA	P	539	R:6	6	2933	3:178936074_6	lung:2761:2|breast:2561:2|unk:357:1|pancreas:1059:1	24592	pancan	0.0127677	single-codon
	DICER1	D	1709	N:10	10	609	14:95560464_10	uterus:618:4|lung:2761:1|skin:974:1|bowel:1782:1|bladder:958:1|cnsbrain:2270:1|softtissue:739:1	24592	pancan	0.0129765	single-codon
	CRLF2	S	128	L:4|S:3	7	96	X:1321372_4|X:1321371_3	skin:974:3|lung:2761:2|breast:2561:1|bowel:1782:1	24592	pancan	0.0130681	single-codon
	RIT1	F	82	L:3|C:1	4	95	1:155874285_3|1:155874286_1	lung:2761:2|skin:974:1|bowel:1782:1	24592	pancan	0.0131233	single-codon
	MYD88	M	232	T:3	3	140	3:38182259_3	blood:890:2|lymph:366:1	24592	blood	0.0134688	single-codon
	PIK3R1	Y	452	C:2|N:1|H:1	4	396	5:67589592_2|5:67589591_2	uterus:618:2|esophagusstomach:1407:1|headandneck:988:1	24592	pancan	0.0137525	single-codon
	KEAP1	G	333	C:4|S:2|F:1	7	641	19:10602581_6|19:10602580_1	lung:2761:7	24592	lung	0.0137808	single-codon
	BCL2	G	33	R:5|G:1	6	255	18:60985803_5|18:60985801_1	lymph:366:6	24592	lymph,pancan	0.0137912	single-codon
	RBM10	R	153	*:7|G:1	8	467	X:47038526_8	lung:2761:2|bladder:958:2|breast:2561:1|headandneck:988:1|bowel:1782:1|pancreas:1059:1	24592	pancan	0.0140587	single-codon
	GATA3	R	366	*:4|Q:1	5	336	10:8115750_4|10:8115751_1	breast:2561:4|unk:357:1	24592	breast	0.0141726	single-codon
	TP53	N	247	I:8|N:7	15	8466	17:7577541_7|17:7577540_4|17:7577539_4	skin:974:7|lung:2761:3|softtissue:739:2|esophagusstomach:1407:1|ovaryfallopiantube:699:1|breast:2561:1	24592	skin	0.0141746	single-codon
	TP53	R	181	H:9|C:9|P:8	26	8466	17:7578388_17|17:7578389_9	lung:2761:7|skin:974:3|cnsbrain:2270:3|bowel:1782:3|esophagusstomach:1407:2|bladder:958:2|prostate:1379:2|pancreas:1059:1|softtissue:739:1|ovaryfallopiantube:699:1|uterus:618:1	24592	skin	0.0141746	single-codon
	RHOA	L	22	R:3|P:1|L:1	5	262	3:49412958_4|3:49412957_1	esophagusstomach:1407:3|bladder:958:1|pancreas:1059:1	24592	pancan,esophagusstomach	0.0143876	single-codon
	STK11	P	179	L:3|R:2|Q:2	7	448	19:1220443_7	lung:2761:3|skin:974:1|pancreas:1059:1|cervix:239:1|adrenalgland:291:1	24592	pancan	0.0144152	single-codon
	ATRX	splice	X199_splice	splice:4	4	1098	X:76940500_3|X:76940499_1	cnsbrain:2270:3|uterus:618:1	24592	cnsbrain	0.0145598	single-codon
	PTEN	L	140	*:3|F:1	4	1101	10:89692935_3|10:89692936_1	uterus:618:2|softtissue:739:1|breast:2561:1	24592	pancan	0.0146529	single-codon
	STAT3	F	384	L:2|Y:1|V:1	4	262	17:40481653_2|17:40481655_1|17:40481654_1	uterus:618:2|breast:2561:1|prostate:1379:1	22029	pancan	0.0148843	single-codon
	TP53	Y	107	*:8|D:6|Y:1	15	8466	17:7579366_9|17:7579368_6	breast:2561:5|lung:2761:2|bowel:1782:2|skin:974:1|liver:636:1|uterus:618:1|lymph:366:1|esophagusstomach:1407:1|prostate:1379:1	24592	pancan,breast	0.0149796	single-codon
	STAT3	D	661	V:3|Y:2	5	262	17:40474419_3|17:40474420_2	headandneck:988:2|blood:890:1|esophagusstomach:1407:1|lymph:366:1	22029	pancan,headandneck	0.0151719	single-codon
	KNSTRN	P	28	L:3|S:2	5	103	15:40675118_3|15:40675119_2	skin:974:5	14256	skin	0.0151834	single-codon
	PIK3R1	splice	X475_splice	splice:5	5	396	5:67589663_3|5:67589664_2	esophagusstomach:1407:2|cnsbrain:2270:1|prostate:1379:1|skin:974:1	24592	pancan	0.0153614	single-codon
	EIF1AX	K	10	E:3|T:1	4	127	X:20156729_3|X:20156728_1	bowel:1782:2|skin:974:1|cnsbrain:2270:1	24592	pancan	0.0159903	single-codon
	ERBB3	M	60	K:3|R:1	4	696	12:56477631_4	bowel:1782:1|bladder:958:1|esophagusstomach:1407:1|uterus:618:1	24592	pancan	0.0162084	single-codon
	TGFBR2	E	544	K:5	5	388	3:30732942_5	headandneck:988:5	24592	headandneck	0.0162667	single-codon
	KMT2D	R	5432	W:4|Q:3|R:1	8	2270	12:49416417_4|12:49416416_3|12:49416415_1	skin:974:3|lung:2761:2|cnsbrain:2270:1|bowel:1782:1|headandneck:988:1	14256	pancan	0.0163159	single-codon
	KEAP1	G	417	V:4|W:1|R:1|E:1	7	641	19:10602328_5|19:10602329_2	lung:2761:7	24592	lung	0.0163932	single-codon
	PTEN	L	146	*:4	4	1101	10:89692953_4	uterus:618:2|esophagusstomach:1407:1|lung:2761:1	24592	pancan	0.0164605	single-codon
	MYC	V	7	M:4	4	249	8:128748858_4	lymph:366:4	24592	lymph	0.0166441	single-codon
	CREBBP	L	1499	P:2|R:1|Q:1	4	1199	16:3786715_4	lymph:366:3|bowel:1782:1	24592	lymph	0.0171122	single-codon
	TRAF7	N	520	S:3|Y:1	4	218	16:2225556_3|16:2225555_1	peritoneum:16:2|bowel:1782:1|softtissue:739:1	24592	peritoneum,pancan	0.0171381	single-codon
	CARD11	D	401	N:3	3	854	7:2976811_3	lymph:366:3	24592	lymph	0.017237	single-codon
	ASXL2	R	357	*:9	9	541	2:25976476_9	skin:974:3|bowel:1782:2|unk:357:1|bladder:958:1|prostate:1379:1|breast:2561:1	24592	pancan	0.0174219	single-codon
	TP53	K	120	E:5|N:2|M:1|*:1	9	8466	17:7579329_6|17:7579327_2|17:7579328_1	cnsbrain:2270:4|lung:2761:2|esophagusstomach:1407:1|headandneck:988:1|skin:974:1	24592	cnsbrain,pancan	0.0176054	single-codon
	MYD88	P	166	L:3|P:1	4	140	3:38181484_3|3:38181485_1	skin:974:4	24592	skin	0.0177533	single-codon
	PIK3CD	C	416	R:2	2	340	1:9779982_2	testis:217:2	24592	testis	0.0177653	single-codon
	GNAQ	G	48	V:1|L:1|*:1	3	206	9:80537255_2|9:80537256_1	eye:128:3	24592	eye	0.0178075	single-codon
	ATM	I	2888	T:3|L:1	4	1291	11:108218084_3|11:108218083_1	breast:2561:1|skin:974:1|lung:2761:1|bladder:958:1	24592	pancan	0.0178317	single-codon
	PTEN	H	61	R:4|Y:1|N:1	6	1101	10:89685287_4|10:89685286_2	cnsbrain:2270:2|uterus:618:1|breast:2561:1|pancreas:1059:1|lung:2761:1	24592	pancan	0.0179438	single-codon
	CARD11	E	93	D:2|Q:1|K:1	4	854	7:2985534_2|7:2985532_2	lymph:366:3|skin:974:1	24592	lymph	0.0182331	single-codon
	TP53	I	254	S:7|V:2|N:1|M:1|L:1|F:1	13	8466	17:7577520_8|17:7577521_4|17:7577519_1	bowel:1782:3|lung:2761:3|liver:636:2|pancreas:1059:2|breast:2561:1|cnsbrain:2270:1|esophagusstomach:1407:1	24592	pancan	0.0184453	single-codon
	ERBB3	R	103	R:2|H:2|G:1	5	696	12:56478853_2|12:56478852_2|12:56478851_1	bladder:958:3|uterus:618:1|bowel:1782:1	24592	bladder	0.0184875	single-codon
	FAM58A	splice	X141_splice	splice:4	4	42	X:152860004_4	skin:974:2|lung:2761:1|breast:2561:1	14256	pancan	0.0186114	single-codon
	CDH1	R	63	*:6|P:1|G:1	8	556	16:68835596_7|16:68835597_1	breast:2561:5|bladder:958:2|cnsbrain:2270:1	24592	breast,pancan	0.0187372	single-codon
	PIK3CA	E	970	K:9	9	2933	3:178948136_9	breast:2561:4|bowel:1782:2|bladder:958:1|headandneck:988:1|esophagusstomach:1407:1	24592	pancan	0.0189638	single-codon
	EP300	Q	1455	H:4|R:1|Q:1	6	871	22:41566488_5|22:41566487_1	bladder:958:6	24592	bladder	0.0189801	single-codon
	HNF1A	S	591	S:2|Y:1	3	306	12:121438872_2|12:121438871_1	esophagusstomach:1407:3	24592	esophagusstomach	0.0197332	single-codon
	AKT1	D	323	Y:2|G:2|N:1	5	310	14:105239420_3|14:105239419_2	bladder:958:1|kidney:1304:1|breast:2561:1|lung:2761:1|prostate:1379:1	24592	pancan	0.0198991	single-codon
	FBXW7	S	546	L:7|P:1|*:1	9	795	4:153247165_8|4:153247166_1	bladder:958:6|prostate:1379:1|headandneck:988:1|kidney:1304:1	24592	bladder	0.0203094	single-codon
	ERBB2	R	138	Q:2|W:1	3	726	17:37864761_2|17:37864760_1	skin:974:3	24592	skin	0.0204568	single-codon
	ANKRD11	K	369	R:5	5	844	16:89351844_5	testis:217:2|skin:974:2|cnsbrain:2270:1	22029	pancan,testis	0.0204755	single-codon
	MTOR	A	1459	D:4|V:1|P:1	6	939	1:11217302_5|1:11217303_1	kidney:1304:2|softtissue:739:1|cnsbrain:2270:1|lung:2761:1|bowel:1782:1	24592	pancan	0.0209022	single-codon
	GTF2I	F	641	F:3|C:1	4	162	7:74159269_3|7:74159268_1	skin:974:3|pancreas:1059:1	14256	skin	0.0209524	single-codon
	TGFBR1	T	375	R:1|K:1|I:1	3	262	9:101907164_3	bowel:1782:3	24592	bowel	0.0210048	single-codon
	PIK3CB	R	321	Q:9	9	358	3:138453486_9	bowel:1782:5|breast:2561:1|skin:974:1|uterus:618:1|esophagusstomach:1407:1	24592	bowel,pancan	0.0210358	single-codon
	ERRFI1	K	409	N:2|Q:1	3	114	1:8073432_2|1:8073434_1	bowel:1782:3	22029	bowel	0.0212232	single-codon
	INPPL1	R	70	H:4	4	248	11:71939260_4	esophagusstomach:1407:4	14256	esophagusstomach	0.022295	single-codon
	ARID1B	G	966	D:4	4	740	6:157488191_4	pancreas:1059:3|headandneck:988:1	24592	pancreas	0.0223083	single-codon
	ERBB2	T	733	I:4	4	726	17:37879903_4	bladder:958:2|bowel:1782:1|uterus:618:1	24592	pancan	0.0223243	single-codon
	CBFB	M	1	T:2|K:1|I:1	4	97	16:67063312_3|16:67063313_1	breast:2561:4	24592	breast	0.0223684	single-codon
	ETV6	R	369	W:6|R:1|Q:1|L:1	9	248	12:12037474_6|12:12037475_2|12:12037476_1	bowel:1782:5|uterus:618:1|bladder:958:1|lung:2761:1|cnsbrain:2270:1	24592	bowel,pancan	0.0227397	single-codon
	TGFBR2	R	520	*:8|R:1	9	388	3:30729962_8|3:30729964_1	pancreas:1059:4|skin:974:2|bowel:1782:1|lung:2761:1|esophagusstomach:1407:1	24592	pancan,pancreas	0.0229676	single-codon
	NF1	R	461	*:7|Q:2	9	1352	17:29533378_7|17:29533379_2	uterus:618:4|lung:2761:2|adrenalgland:291:1|cnsbrain:2270:1|esophagusstomach:1407:1	24592	pancan,uterus	0.0230323	single-codon
	PTPN11	T	468	M:6|T:1	7	298	12:112926270_6|12:112926271_1	bowel:1782:3|esophagusstomach:1407:2|skin:974:2	24592	pancan	0.0231427	single-codon
	EIF1AX	N	4	S:2|Y:1|I:1	4	127	X:20159748_3|X:20159749_1	ovaryfallopiantube:699:1|bowel:1782:1|eye:128:1|thymus:162:1	24592	pancan	0.0232128	single-codon
	EIF1AX	splice	X6_splice	splice:5	5	127	X:20156742_5	bowel:1782:2|prostate:1379:1|eye:128:1|ovaryfallopiantube:699:1	24592	pancan	0.0232128	single-codon
	CDK12	R	890	H:5	5	494	17:37667784_5	bowel:1782:5	24592	bowel	0.0234944	single-codon
	PTEN	L	247	*:3|F:1	4	1101	10:89717715_3|10:89717716_1	uterus:618:1|pancreas:1059:1|cnsbrain:2270:1|lung:2761:1	24592	pancan	0.0240582	single-codon
	CTLA4	T	17	A:5	5	117	2:204732714_5	pancreas:1059:2|bowel:1782:1|liver:636:1|lymph:366:1	24592	pancan,pancreas	0.0243722	single-codon
	BCL10	N	173	H:2	2	70	1:85733495_2	pancreas:1059:2	22029	pancreas	0.0244964	single-codon
	SMO	V	414	V:1|G:1|A:1	3	321	7:128846405_2|7:128846406_1	cervix:239:2|lung:2761:1	24592	cervix	0.0245405	single-codon
	LYN	I	364	N:1|L:1	2	134	8:56910945_1|8:56910944_1	bladder:958:2	14256	bladder	0.0246337	single-codon
	MSH2	E	580	*:6	6	306	2:47698180_6	bowel:1782:5|uterus:618:1	24592	bowel	0.0248537	single-codon
	MET	H	1094	Y:3|R:1	4	591	7:116417463_3|7:116417464_1	kidney:1304:3|lung:2761:1	24592	kidney	0.0248979	single-codon
	PBRM1	splice	X856_splice	splice:4	4	681	3:52643328_4	kidney:1304:4	24592	kidney	0.0256762	single-codon
	CTNNB1	R	535	*:5|Q:2	7	800	3:41275708_5|3:41275709_2	esophagusstomach:1407:4|breast:2561:1|uterus:618:1|headandneck:988:1	24592	pancan,esophagusstomach	0.0258178	single-codon
	TP53	I	232	S:4|T:3|N:3|F:3|I:1	14	8466	17:7577586_10|17:7577587_3|17:7577585_1	bowel:1782:4|breast:2561:2|blood:890:1|prostate:1379:1|skin:974:1|ovaryfallopiantube:699:1|lung:2761:1|uterus:618:1|lymph:366:1|cnsbrain:2270:1	24592	bowel	0.0262979	single-codon
	SMARCD1	R	183	Q:5|L:1|*:1	7	135	12:50481162_6|12:50481161_1	bowel:1782:2|uterus:618:2|biliarytract:358:1|thyroid:618:1|skin:974:1	24592	pancan	0.0268785	single-codon
	PIM1	L	2	F:5|V:1	6	283	6:37138355_6	lymph:366:6	24592	lymph	0.0269741	single-codon
	FOXA1	R	219	S:3|C:3|R:1|G:1	8	317	14:38061334_7|14:38061332_1	prostate:1379:4|bowel:1782:2|cnsbrain:2270:1|skin:974:1	24592	pancan,prostate	0.0270601	single-codon
	IL7R	R	206	*:8|Q:1	9	423	5:35873660_8|5:35873661_1	skin:974:8|esophagusstomach:1407:1	24592	skin	0.0272339	single-codon
	PIM1	E	79	D:4|E:2	6	283	6:37138804_6	lymph:366:6	24592	lymph	0.0274182	single-codon
	RAC1	P	34	R:3|S:1|H:1	5	157	7:6426908_4|7:6426907_1	testis:217:3|skin:974:1|esophagusstomach:1407:1	24592	testis	0.0277543	single-codon
	DICER1	S	1344	L:6|I:1	7	609	14:95569702_7	skin:974:4|uterus:618:2|biliarytract:358:1	24592	pancan	0.0280567	single-codon
	PPM1D	E	525	*:8	8	189	17:58740668_8	uterus:618:5|cnsbrain:2270:2|bowel:1782:1	22029	uterus	0.0280916	single-codon
	NOTCH1	R	365	C:6|S:2	8	1130	9:139413049_8	esophagusstomach:1407:3|skin:974:2|bladder:958:1|cnsbrain:2270:1|lung:2761:1	24592	pancan	0.0280925	single-codon
	CDKN2A	D	74	Y:3|N:3|V:1|G:1	8	769	9:21971138_6|9:21971137_2	lung:2761:3|headandneck:988:2|breast:2561:1|skin:974:1|esophagusstomach:1407:1	24592	pancan	0.0289475	single-codon
	DNMT1	E	432	K:7	7	510	19:10267124_7	bowel:1782:5|bladder:958:1|esophagusstomach:1407:1	24592	bowel	0.0293011	single-codon
	MET	Y	1003	F:1|C:1|*:1	3	591	7:116412023_2|7:116412024_1	lung:2761:3	24592	lung	0.029656	single-codon
	AXIN1	splice	X652_splice	splice:3	3	359	16:343720_3	liver:636:3	24592	liver	0.0296833	single-codon
	KEAP1	V	155	F:4|A:1	5	641	19:10610247_4|19:10610246_1	lung:2761:5	24592	lung	0.0299449	single-codon
	STK11	W	239	C:3|S:1|*:1	5	448	19:1220699_4|19:1220698_1	lung:2761:5	24592	lung	0.0302868	single-codon
	FGFR3	L	8	L:4	4	494	4:1795685_4	lung:2761:3|skin:974:1	24592	lung	0.030299	single-codon
	RNF43	R	145	*:9	9	397	17:56440904_9	pancreas:1059:4|bowel:1782:3|esophagusstomach:1407:1|bladder:958:1	24592	pancan,pancreas	0.0305023	single-codon
	RNF43	R	132	*:11	11	397	17:56440943_11	bowel:1782:6|pancreas:1059:3|uterus:618:1|esophagusstomach:1407:1	24592	pancan,bowel	0.0305023	single-codon
	EPAS1	Y	532	C:2	2	192	2:46607406_2	adrenalgland:291:2	14256	adrenalgland	0.0308917	single-codon
	CD79B	splice	X185_splice	splice:3	3	118	17:62006836_3	lymph:366:3	24592	lymph	0.0312804	single-codon
	POLE	E	18	K:7	7	861	12:133263850_7	breast:2561:3|lung:2761:2|bladder:958:2	24592	pancan	0.0316821	single-codon
	CARD11	R	337	Q:3|*:2	5	854	7:2978320_3|7:2978321_2	lymph:366:3|softtissue:739:1|bowel:1782:1	24592	lymph	0.0317185	single-codon
	CARD11	E	626	K:4|Q:1|*:1	6	854	7:2963931_6	lymph:366:3|lung:2761:2|cervix:239:1	24592	lymph	0.0317185	single-codon
	RBM10	splice	X91_splice	splice:5	5	467	X:47034417_2|X:47034416_2|X:47032597_1	lung:2761:5	24592	lung	0.0317436	single-codon
	PTPN11	T	507	K:3	3	298	12:112926900_3	cnsbrain:2270:3	24592	cnsbrain	0.0318524	single-codon
	PTPN11	D	61	Y:3|N:1	4	298	12:112888165_4	cnsbrain:2270:3|blood:890:1	24592	cnsbrain	0.0318524	single-codon
	NOTCH1	C	440	F:2|W:1|S:1|R:1	5	1130	9:139412326_3|9:139412327_1|9:139412325_1	headandneck:988:3|esophagusstomach:1407:1|cnsbrain:2270:1	24592	pancan,headandneck	0.0322228	single-codon
	NOTCH1	G	310	R:6|E:1	7	1130	9:139413214_6|9:139413213_1	cnsbrain:2270:3|skin:974:3|headandneck:988:1	24592	pancan	0.0322228	single-codon
	ERBB3	R	475	W:8	8	696	12:56487277_8	bowel:1782:3|esophagusstomach:1407:2|skin:974:1|uterus:618:1|bladder:958:1	24592	pancan	0.0325525	single-codon
	SMAD3	R	268	C:7|H:4	11	261	15:67473722_7|15:67473723_4	bowel:1782:7|pancreas:1059:1|lung:2761:1|uterus:618:1|esophagusstomach:1407:1	24592	pancan,bowel	0.0327038	single-codon
	SMAD3	R	287	W:6|Q:2	8	261	15:67473779_6|15:67473780_2	bowel:1782:3|pancreas:1059:1|breast:2561:1|bladder:958:1|skin:974:1|esophagusstomach:1407:1	24592	pancan	0.0327038	single-codon
	HNF1A	I	27	L:4	4	306	12:121416650_4	lymph:366:2|bladder:958:1|bowel:1782:1	24592	lymph	0.0328297	single-codon
	PRDM14	R	505	H:4|C:2	6	216	8:70964514_4|8:70964515_2	bowel:1782:4|uterus:618:1|skin:974:1	14256	bowel	0.0330882	single-codon
	CDKN1B	splice	X159_splice	splice:8	8	112	12:12871758_4|12:12871757_3|12:12871249_1	cnsbrain:2270:2|breast:2561:2|kidney:1304:2|liver:636:1|bladder:958:1	24592	pancan	0.0331705	single-codon
	CDKN1B	G	72	D:3|G:2|A:1	6	112	12:12870988_4|12:12870989_2	bladder:958:1|lymph:366:1|thyroid:618:1|prostate:1379:1|bowel:1782:1|esophagusstomach:1407:1	24592	pancan	0.0331705	single-codon
	ETV6	S	284	S:4|F:2	6	248	12:12022746_4|12:12022745_2	skin:974:5|breast:2561:1	24592	skin	0.0332331	single-codon
	CASP8	splice	X243_splice	splice:7	7	386	2:202137620_3|2:202137501_3|2:202137500_1	headandneck:988:3|skin:974:2|lung:2761:1|uterus:618:1	24592	pancan	0.0339328	single-codon
	MAP2K4	splice	X347_splice	splice:5	5	263	17:12043155_3|17:12043154_1|17:12032606_1	breast:2561:2|bladder:958:1|esophagusstomach:1407:1|bowel:1782:1	24592	pancan	0.0340442	single-codon
	SMARCA4	E	821	K:7|D:1	8	1088	19:11129655_7|19:11129657_1	bladder:958:4|cnsbrain:2270:1|skin:974:1|testis:217:1|kidney:1304:1	24592	pancan	0.0348588	single-codon
	ALK	R	395	H:6|R:1	7	896	2:29606696_6|2:29606695_1	bowel:1782:2|skin:974:1|lung:2761:1|esophagusstomach:1407:1|softtissue:739:1|headandneck:988:1	24592	pancan	0.0351246	single-codon
	CIC	splice	X151_splice	splice:6	6	713	19:42791393_5|19:42791394_1	cnsbrain:2270:3|lymph:366:1|lung:2761:1|esophagusstomach:1407:1	24592	pancan	0.0353206	single-codon
	NOTCH1	E	455	K:6|E:1	7	1130	9:139412282_6|9:139412280_1	headandneck:988:4|skin:974:1|lung:2761:1|esophagusstomach:1407:1	24592	headandneck,pancan	0.0354105	single-codon
	TP53	Q	165	*:15|H:1	16	8466	17:7578437_15|17:7578435_1	prostate:1379:3|lung:2761:3|pancreas:1059:2|breast:2561:2|lymph:366:2|esophagusstomach:1407:1|softtissue:739:1|unk:357:1|bladder:958:1	24592	pancan	0.035559	single-codon
	PIK3CA	R	357	Q:4|L:1|G:1|*:1	7	2933	3:178922301_5|3:178922300_2	bowel:1782:5|uterus:618:1|kidney:1304:1	24592	bowel	0.0361888	single-codon
	STK11	G	251	V:3|C:2|R:1	6	448	19:1221229_3|19:1221228_3	lung:2761:5|bowel:1782:1	24592	pancan,lung	0.0363128	single-codon
	ARID1B	Q	1179	*:4|P:1	5	740	6:157505554_4|6:157505555_1	skin:974:4|lung:2761:1	24592	skin	0.0366276	single-codon
	ARID1A	Q	1142	*:6	6	1439	1:27099008_6	liver:636:2|unk:357:1|kidney:1304:1|bone:297:1|esophagusstomach:1407:1	24592	pancan	0.0366564	single-codon
	RPTOR	R	139	H:8	8	506	17:78681708_8	uterus:618:2|skin:974:1|bladder:958:1|prostate:1379:1|bowel:1782:1|cervix:239:1|pancreas:1059:1	24592	pancan	0.0367985	single-codon
	SF3B1	Y	623	C:2|S:1|H:1	4	638	2:198267489_3|2:198267490_1	bone:297:1|liver:636:1|pleura:76:1|breast:2561:1	24592	pancan	0.0377724	single-codon
	BRCA2	S	2303	S:3|F:2	5	1003	13:32918762_3|13:32918761_2	skin:974:5	24592	skin	0.0384536	single-codon
	RB1	splice	X463_splice	splice:5	5	884	13:48953787_3|13:48953788_2	lung:2761:2|thyroid:618:1|softtissue:739:1|liver:636:1	24592	pancan	0.0384645	single-codon
	PTPRT	R	364	Q:6|*:4|R:2	12	1627	20:41306568_6|20:41306569_5|20:41306567_1	skin:974:5|cnsbrain:2270:2|kidney:1304:1|bowel:1782:1|unk:357:1|lung:2761:1|uterus:618:1	24592	pancan	0.0388462	single-codon
	SETD2	H	1603	R:3|Y:2	5	904	3:47147518_3|3:47147519_2	skin:974:3|headandneck:988:1|cnsbrain:2270:1	24592	pancan	0.0393591	single-codon
	MAX	R	36	W:2	2	112	14:65560491_2	blood:890:2	24592	blood	0.0398857	single-codon
	AXL	T	443	T:2	2	407	19:41748804_2	bladder:958:2	24592	bladder	0.04008	single-codon
	RB1	Y	606	C:2|*:2	4	884	13:49030343_2|13:49030342_2	headandneck:988:2|bladder:958:1|breast:2561:1	24592	pancan	0.0407819	single-codon
	CCND3	Q	276	*:4	4	77	6:41903731_4	esophagusstomach:1407:2|lymph:366:1|bowel:1782:1	24592	pancan	0.0408952	single-codon
	SMARCB1	R	374	Q:5|W:3	8	206	22:24176330_5|22:24176329_3	bowel:1782:2|esophagusstomach:1407:2|unk:357:1|breast:2561:1|cnsbrain:2270:1|pancreas:1059:1	24592	pancan	0.0409235	single-codon
	CUL3	A	20	A:5	5	300	2:225449667_5	skin:974:4|cnsbrain:2270:1	24592	skin	0.041495	single-codon
	BCL10	E	178	E:2|D:1	3	70	1:85733478_3	pancreas:1059:2|prostate:1379:1	22029	pancreas	0.041629	single-codon
	KDM6A	splice	X1246_splice	splice:4	4	612	X:44949177_2|X:44949967_1|X:44949966_1	cervix:239:1|headandneck:988:1|bladder:958:1|lung:2761:1	24592	pancan	0.0416333	single-codon
	TGFBR1	R	487	Q:5|W:3	8	262	9:101911535_5|9:101911534_3	pancreas:1059:2|skin:974:1|bladder:958:1|lung:2761:1|uterus:618:1|bowel:1782:1|esophagusstomach:1407:1	24592	pancan	0.0420026	single-codon
	PTPN11	A	461	T:4|G:1	5	298	12:112926248_4|12:112926249_1	cnsbrain:2270:3|uterus:618:1|skin:974:1	24592	cnsbrain,pancan	0.0426694	single-codon
	PTEN	G	251	V:4|D:1|A:1	6	1101	10:89717727_6	skin:974:2|uterus:618:2|esophagusstomach:1407:1|cnsbrain:2270:1	24592	pancan	0.0430196	single-codon
	PTEN	T	277	I:3|N:1|A:1|*:1	6	1101	10:89720679_4|10:89720678_2	cnsbrain:2270:3|uterus:618:1|ovaryfallopiantube:699:1|bowel:1782:1	24592	pancan	0.0430196	single-codon
	FGFR2	F	276	C:2|I:1	3	458	10:123279605_2|10:123279606_1	biliarytract:358:2|bladder:958:1	24592	biliarytract	0.0435896	single-codon
	STK11	splice	X125_splice	splice:5	5	448	19:1219322_2|19:1218500_2|19:1219321_1	lung:2761:2|unk:357:1|bladder:958:1|esophagusstomach:1407:1	24592	pancan	0.0436726	single-codon
	NSD1	C	1710	Y:1|S:1|*:1	3	840	5:176687152_2|5:176687153_1	headandneck:988:3	24592	headandneck	0.0438692	single-codon
	SMAD4	A	118	V:11	11	735	18:48575159_11	bowel:1782:4|pancreas:1059:3|breast:2561:1|esophagusstomach:1407:1|ampullaofvater:23:1|headandneck:988:1	24592	pancan	0.0442846	single-codon
	CTCF	H	288	Y:1|R:1|D:1	3	360	16:67645934_2|16:67645935_1	breast:2561:3	24592	breast	0.044498	single-codon
	PIK3R1	splice	X434_splice	splice:5	5	396	5:67589535_3|5:67589536_2	breast:2561:1|prostate:1379:1|cnsbrain:2270:1|ovaryfallopiantube:699:1|skin:974:1	24592	pancan	0.0447132	single-codon
	VHL	L	169	P:5	5	383	3:10191513_5	kidney:1304:5	24592	kidney	0.0448754	single-codon
	KNSTRN	C	22	Y:3|S:1	4	103	15:40675101_3|15:40675100_1	lung:2761:2|skin:974:1|esophagusstomach:1407:1	14256	pancan	0.0449961	single-codon
	PPP2R1A	R	182	W:6|R:1	7	358	19:52715979_6|19:52715981_1	uterus:618:2|lung:2761:1|breast:2561:1|bladder:958:1|thyroid:618:1|esophagusstomach:1407:1	24592	pancan	0.0450905	single-codon
	ERRFI1	K	116	*:2	2	114	1:8074313_2	liver:636:2	22029	liver	0.0452215	single-codon
	SMAD4	Y	353	N:2|D:1|C:1	4	735	18:48591894_3|18:48591895_1	lung:2761:1|esophagusstomach:1407:1|biliarytract:358:1|prostate:1379:1	24592	pancan	0.0453956	single-codon
	SMAD4	Y	95	C:2|H:1|*:1	4	735	18:48575090_2|18:48575091_1|18:48575089_1	lung:2761:2|biliarytract:358:1|pancreas:1059:1	24592	pancan	0.0453956	single-codon
	TCF3	N	551	K:2	2	154	19:1612366_2	lymph:366:2	22029	lymph	0.0459435	single-codon
	RPS6KA4	R	629	C:4|H:2|R:1	7	246	11:64137784_3|11:64137785_2|11:64137786_1|11:64137783_1	skin:974:3|bowel:1782:2|lung:2761:1|prostate:1379:1	24592	pancan	0.0462995	single-codon
	RPS6KA4	S	236	L:5|S:1	6	246	11:64129169_5|11:64129170_1	lung:2761:2|skin:974:1|bowel:1782:1|unk:357:1|bladder:958:1	24592	pancan	0.0462995	single-codon
	CBFB	W	73	*:4	4	97	16:67070595_3|16:67070594_1	breast:2561:4	24592	breast	0.0469416	single-codon
	PTEN	L	320	*:2|V:1|S:1	4	1101	10:89720808_3|10:89720807_1	uterus:618:1|prostate:1379:1|lung:2761:1|biliarytract:358:1	24592	pancan	0.0469972	single-codon
	CREBBP	W	1472	R:2|C:2|S:1|G:1	6	1199	16:3786797_3|16:3786795_2|16:3786796_1	headandneck:988:2|lymph:366:2|bladder:958:1|lung:2761:1	24592	pancan	0.0475078	single-codon
	CREBBP	Y	1482	N:1|H:1|D:1|C:1	4	1199	16:3786767_3|16:3786766_1	lymph:366:2|bladder:958:2	24592	pancan	0.0475078	single-codon
	FH	M	336	L:1|I:1	2	168	1:241667444_1|1:241667442_1	liver:636:2	24592	liver	0.0475803	single-codon
	NUP93	A	733	A:2	2	261	16:56873495_2	lymph:366:2	22029	lymph	0.0475974	single-codon
	RECQL4	splice	X766_splice	splice:6	6	370	8:145738768_6	bowel:1782:4|lymph:366:2	24592	bowel	0.0477089	single-codon
	EIF1AX	G	8	R:5|E:1	6	127	X:20156735_5|X:20156734_1	eye:128:2|skin:974:1|ovaryfallopiantube:699:1|thyroid:618:1|cervix:239:1	24592	pancan	0.0479491	single-codon
	RAD52	R	396	R:1|H:1	2	115	12:1023068_1|12:1023067_1	skin:974:2	24592	skin	0.0481337	single-codon
	VHL	L	135	F:2|*:2	4	383	3:10188262_2|3:10188261_2	kidney:1304:4	24592	kidney	0.0482434	single-codon
	HNF1A	R	114	H:3|L:1|C:1	5	306	12:121426650_4|12:121426649_1	uterus:618:3|lung:2761:1|bladder:958:1	24592	uterus	0.0496263	single-codon
	HGF	G	229	A:2|D:1	3	628	7:81374376_3	cervix:239:2|cnsbrain:2270:1	24592	cervix	0.0500918	single-codon
	HNF1A	G	338	G:3|A:1	4	306	12:121434123_3|12:121434122_1	prostate:1379:3|esophagusstomach:1407:1	24592	prostate	0.0514682	single-codon
	TP53	P	190	L:12|T:3|S:1|R:1	17	8466	17:7578280_13|17:7578281_4	bowel:1782:6|prostate:1379:3|cnsbrain:2270:3|lymph:366:1|liver:636:1|lung:2761:1|pancreas:1059:1|kidney:1304:1	24592	bowel	0.051799	single-codon
	KEAP1	R	320	L:3|Q:2|W:1|P:1|M:1	8	641	19:10602619_7|19:10602620_1	lung:2761:6|thyroid:618:1|breast:2561:1	24592	pancan,lung	0.0522548	single-codon
	FBXW7	splice	X195_splice	splice:5	5	795	4:153271193_2|4:153271192_2|4:153268223_1	esophagusstomach:1407:2|lung:2761:1|bowel:1782:1|headandneck:988:1	24592	pancan	0.052852	single-codon
	FBXW7	R	441	W:3|G:2|Q:1|L:1	7	795	4:153249457_5|4:153249456_2	uterus:618:2|lung:2761:2|breast:2561:1|bowel:1782:1|softtissue:739:1	24592	pancan	0.052852	single-codon
	CDKN1A	M	1	V:2|R:1|I:1	4	119	6:36651879_2|6:36651881_1|6:36651880_1	liver:636:3|cnsbrain:2270:1	24592	liver	0.0534199	single-codon
	IRF4	Y	428	H:1|*:1	2	262	6:407526_1|6:407524_1	skin:974:2	24592	skin	0.0553803	single-codon
	TBX3	W	113	*:3|R:1	4	464	12:115120668_2|12:115120669_1|12:115120667_1	breast:2561:3|esophagusstomach:1407:1	24592	breast	0.0557813	single-codon
	KDR	C	482	R:2|*:1	3	883	4:55972946_2|4:55972944_1	lymph:366:2|lung:2761:1	24592	lymph	0.0557974	single-codon
	KMT2A	R	1264	*:5	5	1085	11:118352585_5	bladder:958:3|headandneck:988:1|esophagusstomach:1407:1	14256	bladder	0.056713	single-codon
	ERBB3	N	126	K:3|I:1	4	696	12:56478922_3|12:56478921_1	esophagusstomach:1407:1|bladder:958:1|prostate:1379:1|bowel:1782:1	24592	pancan	0.0570728	single-codon
	TP53	V	197	V:5|L:5|M:3|E:3|G:1	17	8466	17:7578260_8|17:7578259_4|17:7578258_4|17:7578257_1	lung:2761:5|esophagusstomach:1407:3|liver:636:2|breast:2561:2|cnsbrain:2270:1|ovaryfallopiantube:699:1|bladder:958:1|bowel:1782:1|pancreas:1059:1	24592	pancan	0.0571984	single-codon
	SMAD4	G	510	R:2|*:2|E:1|A:1	6	735	18:48604706_4|18:48604707_2	bowel:1782:3|lung:2761:1|pancreas:1059:1|esophagusstomach:1407:1	24592	pancan	0.057459	single-codon
	ATRX	R	907	*:6	6	1098	X:76938029_6	cnsbrain:2270:5|prostate:1379:1	24592	cnsbrain	0.0576614	single-codon
	TSC1	splice	X797_splice	splice:4	4	402	9:135777991_2|9:135777990_2	uterus:618:2|bladder:958:1|skin:974:1	24592	pancan	0.0580127	single-codon
	PLK2	L	208	P:2|V:1	3	220	5:57754228_2|5:57754229_1	esophagusstomach:1407:2|breast:2561:1	24592	esophagusstomach	0.0580752	single-codon
	PTEN	splice	X267_splice	splice:5	5	1101	10:89717778_4|10:89717777_1	thyroid:618:1|lung:2761:1|bowel:1782:1|cnsbrain:2270:1|uterus:618:1	24592	pancan	0.0584506	single-codon
	STK11	W	308	L:3|C:2|*:1	6	448	19:1222987_3|19:1222986_3	lung:2761:5|biliarytract:358:1	24592	pancan,lung	0.0593665	single-codon
	TP53	M	133	K:5|R:3|T:1|I:1	10	8466	17:7578532_9|17:7578531_1	breast:2561:4|pancreas:1059:1|bowel:1782:1|lung:2761:1|skin:974:1|esophagusstomach:1407:1|headandneck:988:1	24592	pancan,breast	0.0598449	single-codon
	KRAS	K	5	E:3	3	2885	12:25398306_3	blood:890:1|bowel:1782:1|cnsbrain:2270:1	24592	pancan	0.0600555	single-codon
	NF1	R	1870	Q:7|W:1	8	1352	17:29654857_7|17:29654856_1	skin:974:3|cnsbrain:2270:2|bowel:1782:1|uterus:618:1|esophagusstomach:1407:1	24592	pancan	0.0602896	single-codon
	EPHA7	G	656	E:6|G:3|W:1|R:1	11	778	6:93967960_6|6:93967959_3|6:93967961_2	skin:974:9|cnsbrain:2270:1|headandneck:988:1	22029	skin	0.0608812	single-codon
	ERBB2	V	697	L:4	4	726	17:37879794_4	breast:2561:1|uterus:618:1|unk:357:1|bowel:1782:1	24592	pancan	0.061122	single-codon
	PTPRS	Y	398	Y:4	4	788	19:5244288_4	pancreas:1059:3|uterus:618:1	24592	pancreas	0.0611496	single-codon
	HIST1H3H	K	37	M:3|E:1	4	80	6:27777961_3|6:27777960_1	headandneck:988:1|lung:2761:1|bladder:958:1|skin:974:1	22029	pancan	0.0613364	single-codon
	KEAP1	R	601	L:4|W:2	6	641	19:10597401_4|19:10597402_2	lung:2761:6	24592	lung	0.0615591	single-codon
	RAD51C	Y	224	H:2	2	115	17:56780655_2	bladder:958:2	24592	bladder	0.0615844	single-codon
	RAD51C	P	21	S:2|T:1|A:1	4	115	17:56770065_4	breast:2561:3|bladder:958:1	24592	breast	0.0616334	single-codon
	BCL2L11	G	156	R:3|E:2|*:1	6	95	2:111907692_4|2:111907693_2	uterus:618:2|unk:357:1|lung:2761:1|cervix:239:1|esophagusstomach:1407:1	24592	pancan	0.0618483	single-codon
	EZH2	K	665	R:1|E:1	2	312	7:148507461_1|7:148507460_1	lymph:366:2	24592	lymph	0.0620629	single-codon
	MAP2K4	R	110	*:4|Q:2|P:1|L:1	8	263	17:11984783_4|17:11984782_4	uterus:618:2|pancreas:1059:1|thyroid:618:1|lung:2761:1|breast:2561:1|ovaryfallopiantube:699:1|esophagusstomach:1407:1	24592	pancan	0.062597	single-codon
	TP53	H	178	D:5|P:3|Q:2|N:1|H:1	12	8466	17:7578398_6|17:7578397_3|17:7578396_2|17:7578395_1	uterus:618:3|ovaryfallopiantube:699:2|unk:357:2|cnsbrain:2270:2|skin:974:1|biliarytract:358:1|kidney:1304:1	24592	uterus	0.0627914	single-codon
	SPRED1	R	349	W:1|S:1	2	94	15:38643577_1|15:38643575_1	bladder:958:2	14256	bladder	0.0638652	single-codon
	TP53	V	218	G:5|V:1|M:1|L:1|E:1	9	8466	17:7578196_6|17:7578197_2|17:7578195_1	skin:974:2|headandneck:988:2|bladder:958:2|lung:2761:1|unk:357:1|lymph:366:1	24592	pancan	0.0643907	single-codon
	SETD2	splice	X1572_splice	splice:6	6	904	3:47155365_5|3:47147611_1	kidney:1304:3|lung:2761:1|bowel:1782:1|esophagusstomach:1407:1	24592	pancan	0.0645658	single-codon
	CIC	P	203	S:2|L:1|A:1	4	713	19:42791721_3|19:42791722_1	cnsbrain:2270:3|uterus:618:1	24592	cnsbrain	0.0647601	single-codon
	KMT2C	R	56	Q:6|*:4	10	2066	7:152055755_6|7:152055756_4	uterus:618:4|bowel:1782:3|breast:2561:1|lung:2761:1|headandneck:988:1	14256	pancan	0.064939	single-codon
	KMT2C	R	4549	C:7|S:1|H:1	9	2066	7:151845367_8|7:151845366_1	skin:974:2|bladder:958:2|unk:357:1|pancreas:1059:1|breast:2561:1|prostate:1379:1|bowel:1782:1	14256	pancan	0.064939	single-codon
	MEF2B	K	4	E:4	4	144	19:19261535_4	lymph:366:4	24592	lymph	0.0651251	single-codon
	RIT1	A	77	T:3|S:1|P:1	5	95	1:155874530_5	lung:2761:2|uterus:618:1|biliarytract:358:1|bowel:1782:1	24592	pancan	0.0651693	single-codon
	PTEN	I	67	T:2|V:1|K:1	4	1101	10:89685305_3|10:89685304_1	ovaryfallopiantube:699:1|breast:2561:1|uterus:618:1|softtissue:739:1	24592	pancan	0.0651819	single-codon
	PPP4R2	*	418	Y:1|L:1	2	60	3:73114873_1|3:73114872_1	skin:974:2	14256	skin	0.0652217	single-codon
	PIK3CD	R	894	R:4|Q:1	5	340	1:9784114_4|1:9784113_1	esophagusstomach:1407:3|prostate:1379:2	24592	esophagusstomach	0.0656422	single-codon
	KDM6A	splice	X76_splice	splice:3	3	612	X:44820527_2|X:44820528_1	bladder:958:3	24592	bladder	0.065788	single-codon
	ERBB4	F	1102	C:4|F:1	5	1157	2:212251754_4|2:212251753_1	esophagusstomach:1407:3|bladder:958:1|bowel:1782:1	24592	esophagusstomach	0.0659327	single-codon
	ATM	R	2832	C:6|S:1	7	1291	11:108216545_7	lung:2761:2|breast:2561:1|cnsbrain:2270:1|skin:974:1|thyroid:618:1|esophagusstomach:1407:1	24592	pancan	0.0660576	single-codon
	TET2	R	550	*:7	7	589	4:106156747_7	blood:890:2|bowel:1782:1|unk:357:1|uterus:618:1|lymph:366:1|headandneck:988:1	24592	pancan	0.0664757	single-codon
	SMAD2	R	182	*:7|R:1	8	236	18:45394805_8	bowel:1782:4|uterus:618:2|prostate:1379:1|headandneck:988:1	24592	pancan	0.0681351	single-codon
	BCL2	N	172	S:3|N:2|Q:1	6	255	18:60985385_3|18:60985384_3	lymph:366:5|bowel:1782:1	24592	pancan	0.0692871	single-codon
	FGFR2	P	253	R:4|L:2	6	458	10:123279674_6	lung:2761:2|uterus:618:1|breast:2561:1|ovaryfallopiantube:699:1|bowel:1782:1	24592	pancan	0.0694873	single-codon
	PTEN	Y	174	*:2|H:1|D:1	4	1101	10:89711904_2|10:89711902_2	breast:2561:2|cnsbrain:2270:1|skin:974:1	24592	pancan	0.0712042	single-codon
	MET	T	222	T:7	7	591	7:116339804_7	skin:974:5|uterus:618:2	24592	skin	0.0714242	single-codon
	BRAF	splice	X327_splice	splice:3	3	1450	7:140500160_1|7:140494269_1|7:140494268_1	skin:974:2|lung:2761:1	24592	skin	0.0717947	single-codon
	TGFBR1	I	259	I:2|N:1	3	262	9:101900343_2|9:101900342_1	cervix:239:2|skin:974:1	24592	cervix	0.072583	single-codon
	ERBB4	S	774	G:2|R:1|N:1	4	1157	2:212426795_3|2:212426794_1	esophagusstomach:1407:4	24592	esophagusstomach	0.0732417	single-codon
	CCND1	C	47	S:3|G:1	4	161	11:69456220_3|11:69456219_1	lymph:366:3|blood:890:1	24592	lymph	0.0733365	single-codon
	ARID1A	splice	X911_splice	splice:5	5	1439	1:27089777_3|1:27092711_1|1:27089778_1	lung:2761:2|biliarytract:358:1|bladder:958:1|skin:974:1	24592	pancan	0.0734346	single-codon
	ERBB2	A	293	T:4|V:1|P:1	6	726	17:37866710_5|17:37866711_1	bowel:1782:2|lung:2761:1|unk:357:1|ovaryfallopiantube:699:1|skin:974:1	24592	pancan	0.0736415	single-codon
	ERBB2	I	767	M:9	9	726	17:37880257_9	bladder:958:4|breast:2561:3|headandneck:988:1|bowel:1782:1	24592	pancan	0.0741556	single-codon
	BRD4	P	1065	P:3|R:1	4	503	19:15350808_3|19:15350809_1	skin:974:3|esophagusstomach:1407:1	24592	skin	0.0743406	single-codon
	KDM6A	splice	X129_splice	splice:5	5	612	X:44870204_3|X:44870205_2	bladder:958:3|headandneck:988:1|kidney:1304:1	24592	bladder	0.0772719	single-codon
	PGR	R	836	Q:8|*:1	9	412	11:100912815_8|11:100912816_1	skin:974:5|bowel:1782:2|uterus:618:1|cnsbrain:2270:1	22029	skin	0.0776187	single-codon
	PTPRS	R	1492	W:4|Q:3|R:1	8	788	19:5214592_4|19:5214591_3|19:5214590_1	bowel:1782:3|esophagusstomach:1407:2|headandneck:988:1|kidney:1304:1|bladder:958:1	24592	pancan	0.0779048	single-codon
	CBL	C	384	R:3|W:1	4	330	11:119148930_3|11:119148932_1	cnsbrain:2270:2|skin:974:1|softtissue:739:1	24592	pancan	0.0780707	single-codon
	EPHA3	R	136	*:11	11	1008	3:89259262_11	skin:974:7|unk:357:3|uterus:618:1	24592	skin	0.0785023	single-codon
	PBRM1	R	921	*:7	7	681	3:52637555_7	adrenalgland:291:1|bowel:1782:1|lung:2761:1|uterus:618:1|kidney:1304:1|cnsbrain:2270:1|headandneck:988:1	24592	pancan	0.0788067	single-codon
	HIST1H1C	E	115	K:4	4	268	6:26056314_4	breast:2561:4	24592	breast	0.0790685	single-codon
	KDM6A	Q	1003	*:2|P:1	3	612	X:44938459_2|X:44938460_1	bladder:958:3	24592	bladder	0.0794831	single-codon
	MAP3K13	splice	X502_splice	splice:4	4	374	3:185184613_4	esophagusstomach:1407:3|prostate:1379:1	24592	esophagusstomach	0.0818345	single-codon
	PDGFRA	C	235	Y:2|S:1|R:1	4	690	4:55131161_3|4:55131160_1	cnsbrain:2270:3|skin:974:1	24592	cnsbrain	0.0823671	single-codon
	ERCC3	L	713	L:2	2	244	2:128016952_1|2:128016950_1	blood:890:2	24592	blood	0.0830156	single-codon
	PTEN	I	101	T:4	4	1101	10:89692818_4	cnsbrain:2270:2|unk:357:1|softtissue:739:1	24592	pancan	0.0832641	single-codon
	NFE2L2	I	28	T:3	3	385	2:178098962_3	lung:2761:1|headandneck:988:1|pancreas:1059:1	24592	pancan	0.0834735	single-codon
	CDH1	Y	190	C:3	3	556	16:68842633_3	esophagusstomach:1407:3	24592	esophagusstomach	0.0839077	single-codon
	APC	S	1315	*:8	8	2141	5:112175235_8	bowel:1782:8	24592	bowel	0.0850521	single-codon
	IRS2	G	1057	D:3	3	397	13:110435231_3	lymph:366:2|bowel:1782:1	24592	lymph	0.0854265	single-codon
	PIM1	N	7	N:4	4	283	6:37138372_4	lymph:366:4	24592	lymph	0.0854284	single-codon
	SMAD2	C	463	*:3|F:1	4	236	18:45368213_3|18:45368214_1	bowel:1782:4	24592	bowel	0.0862676	single-codon
	SMAD2	R	321	Q:5|*:4	9	236	18:45374881_5|18:45374882_4	bowel:1782:6|esophagusstomach:1407:3	24592	bowel,pancan	0.0862676	single-codon
	SPOP	K	129	E:3	3	332	17:47696438_3	prostate:1379:3	24592	prostate	0.0864495	single-codon
	CARD11	R	423	Q:3|W:2|R:1	6	854	7:2976744_3|7:2976745_2|7:2976743_1	bowel:1782:5|lung:2761:1	24592	bowel	0.0866304	single-codon
	TRAF7	R	189	W:1|R:1|P:1|L:1	4	218	16:2222282_2|16:2222283_1|16:2222281_1	lung:2761:3|bladder:958:1	24592	lung	0.0869694	single-codon
	KIT	R	888	W:3|Q:3|R:1	7	592	4:55602953_3|4:55602952_3|4:55602954_1	bowel:1782:2|liver:636:1|adrenalgland:291:1|softtissue:739:1|ovaryfallopiantube:699:1|uterus:618:1	24592	pancan	0.0873754	single-codon
	IKZF1	E	304	K:7|Q:1	8	485	7:50467675_8	skin:974:6|unk:357:1|bladder:958:1	24592	skin	0.0875565	single-codon
	RHOA	L	69	R:2|P:2|M:1	5	262	3:49405932_4|3:49405933_1	lymph:366:2|esophagusstomach:1407:2|bowel:1782:1	24592	pancan	0.088486	single-codon
	CASP8	R	494	*:8	8	386	2:202150039_8	headandneck:988:3|lung:2761:1|uterus:618:1|esophagusstomach:1407:1|cervix:239:1|bladder:958:1	24592	pancan	0.0886118	single-codon
	TNFRSF14	C	111	W:2|Y:1	3	106	1:2491290_2|1:2491289_1	bladder:958:2|lymph:366:1	24592	bladder	0.0888304	single-codon
	PMS2	K	651	R:4	4	264	7:6026444_4	testis:217:2|softtissue:739:1|cnsbrain:2270:1	24592	testis	0.0894081	single-codon
	MAP2K1	N	122	D:3	3	240	15:66729156_3	lymph:366:1|lung:2761:1|esophagusstomach:1407:1	24592	pancan	0.0894798	single-codon
	SDHAF2	S	10	L:3|A:1|*:1	5	67	11:61197647_4|11:61197646_1	lung:2761:3|cervix:239:1|kidney:1304:1	24592	pancan	0.0901169	single-codon
	RAC1	K	135	R:1|N:1	2	157	7:6441558_1|7:6441557_1	headandneck:988:2	24592	headandneck	0.0909173	single-codon
	CCND1	E	9	E:3|K:1|D:1	5	161	11:69456108_4|11:69456106_1	blood:890:2|breast:2561:1|lymph:366:1|bowel:1782:1	24592	pancan	0.0910705	single-codon
	EIF4A2	M	1	V:1|R:1|K:1|I:1	4	141	3:186501401_2|3:186501402_1|3:186501400_1	skin:974:1|prostate:1379:1|lung:2761:1|breast:2561:1	22029	pancan	0.091343	single-codon
	CREBBP	I	1431	V:1|S:1|N:1|I:1	4	1199	16:3788662_2|16:3788663_1|16:3788661_1	bladder:958:2|lymph:366:1|headandneck:988:1	24592	pancan	0.0936695	single-codon
	ARID1B	T	1652	M:3|T:1|A:1	5	740	6:157525060_3|6:157525061_1|6:157525059_1	skin:974:2|bladder:958:1|bowel:1782:1|esophagusstomach:1407:1	24592	skin	0.0938231	single-codon
	VHL	W	117	L:3|*:2|C:1	6	383	3:10188207_4|3:10188208_2	kidney:1304:5|pancreas:1059:1	24592	pancan	0.0942718	single-codon
	VHL	Y	112	*:2|Y:1|D:1|C:1	5	383	3:10183867_3|3:10183866_1|3:10183865_1	kidney:1304:3|pancreas:1059:1|cnsbrain:2270:1	24592	pancan	0.0942718	single-codon
	WHSC1	T	1150	A:3	3	271	4:1976665_3	lymph:366:2|cnsbrain:2270:1	14256	lymph	0.0946427	single-codon
	SMAD4	S	178	*:9	9	735	18:48581229_9	pancreas:1059:3|bowel:1782:2|esophagusstomach:1407:2|bladder:958:1|cervix:239:1	24592	pancan	0.0946589	single-codon
	SOS1	A	90	A:3|V:1|T:1	5	233	2:39285889_3|2:39285891_1|2:39285890_1	skin:974:2|cnsbrain:2270:1|lung:2761:1|kidney:1304:1	14256	pancan	0.0949774	single-codon
	SMAD2	T	303	R:2|I:1	3	236	18:45374935_3	bowel:1782:3	24592	bowel	0.0953428	single-codon
	RB1	splice	X406_splice	splice:9	9	884	13:48951053_8|13:48951052_1	breast:2561:2|pancreas:1059:1|lung:2761:1|prostate:1379:1|ovaryfallopiantube:699:1|cnsbrain:2270:1|bladder:958:1|liver:636:1	24592	pancan	0.0953652	single-codon
	EP300	L	415	P:3	3	871	22:41525969_3	lymph:366:2|bladder:958:1	24592	lymph	0.0954267	single-codon
	SMARCA4	R	1157	W:4|Q:3	7	1088	19:11141492_4|19:11141493_3	bladder:958:2|bowel:1782:2|lymph:366:1|skin:974:1|thymus:162:1	24592	pancan	0.0955798	single-codon
	PTEN	W	274	*:6|S:1	7	1101	10:89720670_4|10:89720671_3	cnsbrain:2270:3|uterus:618:2|breast:2561:1|skin:974:1	24592	pancan	0.0955806	single-codon
	PTEN	Y	65	*:5	5	1101	10:89685300_5	uterus:618:2|kidney:1304:1|cnsbrain:2270:1|cervix:239:1	24592	pancan	0.0955806	single-codon
	SMAD2	P	305	L:2|T:1|Q:1	4	236	18:45374929_3|18:45374930_1	bowel:1782:3|prostate:1379:1	24592	bowel	0.0969118	single-codon
	SF3B1	V	701	F:2|I:1|A:1	4	638	2:198266831_3|2:198266830_1	blood:890:1|skin:974:1|lung:2761:1|lymph:366:1	24592	pancan	0.0969152	single-codon
	NOTCH1	I	471	T:4	4	1130	9:139412233_4	esophagusstomach:1407:2|pancreas:1059:1|headandneck:988:1	24592	pancan	0.0983536	single-codon
	RAC1	C	18	Y:2|S:1|F:1	4	157	7:6426860_4	headandneck:988:2|bowel:1782:1|lung:2761:1	24592	pancan	0.0992432	single-codon
	CTCF	M	1	V:2|T:1|I:1	4	360	16:67644736_2|16:67644738_1|16:67644737_1	pancreas:1059:1|esophagusstomach:1407:1|breast:2561:1|softtissue:739:1	24592	pancan	0.0997648	single-codon
	STK11	G	196	V:4|R:1|G:1	6	448	19:1220494_4|19:1220495_1|19:1220493_1	lung:2761:3|bowel:1782:1|unk:357:1|skin:974:1	24592	pancan	0.0999093	single-codon
	STK11	splice	X200_splice	splice:5	5	448	19:1220578_4|19:1220579_1	lung:2761:4|unk:357:1	24592	pancan	0.0999093	single-codon
	FBXW7	T	385	K:2|P:1|I:1	4	795	4:153250906_3|4:153250907_1	esophagusstomach:1407:1|blood:890:1|bladder:958:1|uterus:618:1	24592	pancan	0.0999936	single-codon
	FBXW7	R	393	*:4|Q:3	7	795	4:153250883_4|4:153250882_3	bowel:1782:2|pancreas:1059:1|headandneck:988:1|uterus:618:1|biliarytract:358:1|esophagusstomach:1407:1	24592	pancan	0.0999936	single-codon

## Sheet: Table S4
Supplementary Table 4: Statistically significant indel hotspots
	Hugo Symbol	Reference Amino Acid	Amino Acid Position	Variant Amino Acid	Mutation Count	Total Mutations in Gene	Genomic Position	Organ Types	Total Samples	Analysis Type	qvalue
	EGFR	KELREA:78|ELREA:46|ELREAT:12|LREATSP:8|ELR:3|LREATS:2|TSPKANKEI:2|ATSPKANKE:1|EATSPK:1|I:1|KANKEI:1|SPKANKEI:1	745-759	E746_A750del:124|L747_T751del:9|L747_P753delinsS:8|S752_I759del:3|L747_E749del:3|E746_T751delinsA:3|L747_S752del:2|T751_E758del:1|T751_A755del:1|K754_I759del:1|K745_E746insVPVAIK:1	156	224	7:55242465_78|7:55242466_49|7:55242468_9|7:55242470_8|7:55242467_3|7:55242483_2|7:55242469_2|7:55242490_1|7:55242484_1|7:55242480_1|7:55242476_1|7:55242448_1	lung:2767:156	24592	pancan	0
	PIK3R1	-:6|HEY:6|L:6|EYDRL:4|R:4|DNIEAVGKKLHEYNT:3|EK:3|KL:3|KLHEYN:3|TQF:3|E:2|EYNTQFQ:2|FQEKS:2|H:2|Q:2|RE:2|SREYD:2|Y:2|D:1|DNIEAVGKKLHEY:1|DRLY:1|EDNIEAVGKK:1|EDNIEAVGKKLH:1|EY:1|EYNTQFQEKSR:1|GKKL:1|HEYNT:1|IE:1|KE:1|KKLHEYNTQFQE:1|LHE:1|LHEYNTQ:1|LHEYNTQFQEK:1|LYEEY:1|N:1|NTQ:1|NTQFQ:1|QE:1|QEK:1|QEKSRE:1|QFQEK:1|REYDR:1|RL:1|RLYEE:1|T:1|TQFQEK:1|VGKKLHE:1|YEEY:1|YN:1	439-470	E451_Y452del:6|D464_Y467del:4|N441_T454del:3|L449del:3|K459del:3|F456_Q457del:3|Y452dup:2|Y452_Q457del:2|R461_E462delinsQ:2|Q457_S460del:2|Q455_F456insL:2|N453del:2|K448_N453del:2|H450_E451insVH:2|E462_R465del:2|E458del:2|Y467_Y470del:1|Y463_E468dup:1|Y452_N453insF:1|S460_D464del:1|R465dup:1|R465_Y467del:1|Q457_E462del:1|Q455_S460dup:1|Q455_K459del:1|N453_Y463del:1|N453_Q457del:1|N453_Q455delinsK…	88	293	5:67589586_6|5:67589619_5|5:67589623_4|5:67589599_4|5:67589581_4|5:67589610_3|5:67589601_3|5:67589585_3|5:67589583_3|5:67589582_3|5:67589557_3|5:67589632_2|5:67589607_2|5:67589605_2|5:67589594_2|5:67589592_2|5:67589590_2|5:67589589_2|5:67589588_2|5:67589584_2|5:67589579_2|5:67589636_1|5:67589635_1|5:67589634_1|5:67589630_1|5:67589629_1|5:67589628_1|5:67589626_1|5:67589622_1|5:67589620_1|5:6758961…	uterus:543:31|cnsbrain:2283:29|breast:2559:11|bowel:1782:4|lung:2767:4|headandneck:988:3|esophagusstomach:1413:3|ovaryfallopiantube:699:2|softtissue:838:1	24592	pancan	9.34523e-183
	KIT	QWK:10|YD:7|-:2|KVV:2|KVVE:2|GNNYVYIDP:1|GNNYVYIDPT:1|KP:1|KPMYEV:1|KVVEEING:1|L:1|MYE:1|MYEV:1|NNYVYIDPT:1|PM:1|PMY:1|PMYEV:1|PMYEVQW:1|PMYEVQWKVVEEINGNNYVY:1|QWKVV:1|QWKVVE:1|QWKVVEEINGNNYVYID:1|T:1|TQ:1|V:1|VQWKVVEEINGNNYVYID:1|VVEEINGN:1|VVEEINGNNYVYIDP:1|VYIDPTQL:1|WKV:1|YE:1	550-580	W557_K558del:10|D579del:7|V559_E561del:2|Q556_D572del:2|N566_P573del:2|Y578_D579insEQQLPY:1|Y570_L576del:1|Y553_E554del:1|W557_V559delinsF:1|W557_E561del:1|V560del:1|V559_P573del:1|V559_N566delinsD:1|V559_G565del:1|T574_H580dup:1|Q575del:1|Q556_V560delinsH:1|P551_Y553delinsH:1|P551_V555del:1|P551_M552delinsL:1|M552_Y570del:1|M552_W557del:1|M552_V555delinsI:1|M552_V555del:1|M552_E554delinsI:1|L576…	49	84	4:55593601_11|4:55593667_7|4:55593587_3|4:55593609_2|4:55593608_2|4:55593607_2|4:55593586_2|4:55593662_1|4:55593660_1|4:55593656_1|4:55593655_1|4:55593653_1|4:55593640_1|4:55593631_1|4:55593629_1|4:55593628_1|4:55593610_1|4:55593606_1|4:55593604_1|4:55593602_1|4:55593600_1|4:55593599_1|4:55593591_1|4:55593590_1|4:55593589_1|4:55593584_1|4:55593582_1	softtissue:838:39|skin:974:3|bowel:1782:2|testis:217:2|lung:2767:1|vulvavagina:17:1|breast:2559:1	24592	pancan	1.97748e-126
	PIK3R1	KT:7|IKPDL:5|IK:3|R:3|L:2|LR:2|LRKT:2|REIDK:2|TR:2|-:1|DL:1|DLIQLRKTRDQYL:1|DQYLM:1|I:1|IKP:1|IQLR:1|IQLRK:1|KPDLIQL:1|KTRDQYL:1|LIQLRKTRDQYL:1|MN:1|MNSIKPDL:1|NSIKP:1|PDLIQLRKTR:1|QL:1|QLRK:1|QY:1|RD:1|TRDQYL:1|Y:1	558-582	T576del:6|R574del:4|K567_L570del:4|K567del:3|R577del:2|K575_R577del:2|Y580_L581insF:1|R577_L581del:1|R577_D578del:1|Q579_Y580delinsH:1|P568_L573del:1|N564_P568delinsT:1|M563_N564delinsI:1|M563_L570delinsI:1|L573del:1|L573_R574del:1|L573_K575del:1|L570_I571insY:1|L570_D578del:1|K575_T576del:1|K575_R577dup:1|K575_L581delinsM:1|K567_I571del:1|I571_R574del:1|I571_Q572insR:1|I571_L581del:1|I571_K575de…	49	293	5:67591132_6|5:67591104_5|5:67591135_3|5:67591127_3|5:67591126_3|5:67591105_3|5:67591118_2|5:67591116_2|5:67591111_2|5:67591146_1|5:67591143_1|5:67591141_1|5:67591136_1|5:67591131_1|5:67591130_1|5:67591125_1|5:67591124_1|5:67591123_1|5:67591122_1|5:67591119_1|5:67591114_1|5:67591113_1|5:67591108_1|5:67591103_1|5:67591098_1|5:67591096_1|5:67591095_1|5:67591078_1|5:67591076_1	uterus:543:22|cnsbrain:2283:7|breast:2559:6|prostate:1379:3|headandneck:988:2|lung:2767:2|cervix:234:2|bowel:1782:2|kidney:1305:1|esophagusstomach:1413:1|liver:636:1	24592	pancan	8.12893e-89
	ERBB2	-:33|V:1	772-775	Y772_A775dup:33|M774dup:1	34	66	17:37880981_29|17:37880984_4|17:37880988_1	lung:2767:25|breast:2559:3|bladder:955:2|unk:357:1|bowel:1782:1|ovaryfallopiantube:699:1|esophagusstomach:1413:1	24592	pancan	1.41703e-86
	FOXA1	FEN:6|-:2|ENG:2|GNMFE:2|GNMFENG:2|SGNMFENGCYL:2|APAPG:1|CYLR:1|DSGN:1|DSGNMFE:1|FE:1|FENG:1|FENGCYL:1|G:1|GGSGAKGG:1|KRFK:1|MFEN:1|MFENGCY:1|NHPF:1|NMFENG:1|NMFENGC:1|NMFENGCYLRRQKRFKCEKQPGAGGGGGSGSGGSGAKGGPESRKDPSGASNPSADSPLHRGVHGKTGQLEGAPAPGPAASPQTLDHSGATATGGASELKTPASSTAPPISSGPGALASVPASHPAHGLAPHESQLHLKGDPHYSFNHPFSINNLMSS:1|Q:1|QKRFKC:1|QKRFKCEKQPGAGGGGGSGSGGSGAKGGPESRKD:1|RFKCEKQ:1|RQKRFKCEKQPG…	249-409	F254_N256delinsY:6|S250_Y259del:2|G251_G257del:2|G251_F254del:2|E255_N256del:2|S409del:1|S282_G283dup:1|S250_N252del:1|S250_F254del:1|R265_K270del:1|Q263del:1|Q263_G281del:1|Q263_D296delinsH:1|Q263_C268del:1|N397_F400del:1|N252_S408del:1|N252_G257del:1|N252_C258del:1|M253_Y259del:1|M253_N256del:1|K267dup:1|K264dup:1|K264_K267del:1|G284_G290del:1|F254_L260del:1|F254_G257delinsC:1|F254_E255del:1|D2…	40	120	14:38061223_6|14:38061220_3|14:38061218_3|14:38061233_2|14:38061226_2|14:38061211_2|14:38061227_1|14:38061225_1|14:38061224_1|14:38061221_1|14:38061215_1|14:38061212_1|14:38061209_1|14:38061206_1|14:38061200_1|14:38061196_1|14:38061188_1|14:38061187_1|14:38061185_1|14:38061178_1|14:38061147_1|14:38061140_1|14:38061120_1|14:38061102_1|14:38061010_1|14:38060789_1|14:38060765_1|14:38060763_1	prostate:1379:34|breast:2559:6	24592	pancan	6.2558e-73
	EGFR	D:9|P:6|A:5|M:5|-:4|N:4	764-774	N771_H773dup:7|H773dup:5|A767_V769dup:5|S768_D770dup:4|Y764_D770dup:1|P772_H773insTPNP:1|P772_H773dup:1|N771_P772insV:1|N771_P772insHH:1|N771_P772insH:1|H773_V774dup:1|D770_P772dup:1|D770_N771insY:1|D770_N771insGL:1|D770_N771insGF:1|D770_N771insG:1	33	224	7:55249010_8|7:55249017_6|7:55248998_5|7:55249002_4|7:55249013_3|7:55249012_3|7:55249014_1|7:55249011_1|7:55249009_1|7:55248990_1	lung:2767:22|cnsbrain:2283:6|bladder:955:4|uterus:543:1	24592	pancan	1.49809e-72
	TP53	IT:10|L:4|-:3|C:3|I:3|LL:3|A:2|EE:2|N:2|NS:2|NSS:2|R:2|S:2|SFE:2|TLEDSS:2|ACPGRDRRTEE:1|CACPGRDR:1|CN:1|CNSS:1|CNSSCM:1|CT:1|CTTIHY:1|EEENLRKKG:1|G:1|GGM:1|GMNRRP:1|LTI:1|LTIITL:1|M:1|MCNS:1|MGGMNRRPILTIIT:1|NLLGRN:1|NLLGRNS:1|PI:1|PIL:1|RNSFEVR:1|RR:1|RVCACPG:1|SF:1|SS:1|SSCM:1|T:1|TI:1|TIIT:1|Y:1|YM:1|YNYMC:1	229-292	I255del:9|L265del:3|L252del:3|V274_C275dup:2|T256_S260del:2|T253dup:2|S241dup:2|N239dup:2|N239_S241del:2|N239_S240del:2|N235del:2|E286_E287del:2|Y236_M237delinsL:1|Y234del:1|Y234_M237del:1|V274dup:1|V274_G279del:1|V272_R273insL:1|T256del:1|T253_L257del:1|T231_I232insTDCTT:1|T231_I232del:1|S269_E271delinsK:1|S269_E271del:1|S260_L264dup:1|S240_S241del:1|S240_C242del:1|R282_R283del:1|P250_L252del:1|…	76	1423	17:7577515_10|17:7577525_4|17:7577558_3|17:7577514_3|17:7577144_3|17:7577576_2|17:7577562_2|17:7577561_2|17:7577556_2|17:7577520_2|17:7577500_2|17:7577120_2|17:7577111_2|17:7577093_2|17:7577077_2|17:7577591_1|17:7577586_1|17:7577585_1|17:7577581_1|17:7577579_1|17:7577572_1|17:7577571_1|17:7577569_1|17:7577566_1|17:7577563_1|17:7577560_1|17:7577554_1|17:7577552_1|17:7577545_1|17:7577533_1|17:75775…	lung:2767:14|bowel:1782:12|esophagusstomach:1413:11|cnsbrain:2283:8|ovaryfallopiantube:699:6|headandneck:988:5|unk:357:4|softtissue:838:4|breast:2559:3|pancreas:1059:3|uterus:543:2|thyroid:618:1|prostate:1379:1|skin:974:1|lymph:366:1	24592	pancan	1.46522e-64
	CTNNB1	PS:6|SYLD:2|-:1|APSLSGKGN:1|DS:1|DSGI:1|DSGIHS:1|DSGIHSGA:1|HWQQQSYLD:1|HWQQQSYLDSGI:1|LDS:1|PSLSGKGNPEEEDVDTS:1|QQQSYLD:1|QSYLD:1|SGATTTAP:1|SGIHSGATTTAPSLSGKGNPEEEDVDTSQVLYEWEQGF:1|TAPSLSGK:1|TTTAPS:1|TTTAPSLS:1|VSHWQQQSYLDS:1|YLDSGI:1	23-71	S45del:6|Y30_S33del:2|W25_H36del:1|W25_D32del:1|T42_K49del:1|T41_S47del:1|T41_S45del:1|S45_P52del:1|S33_A39del:1|S23_S33del:1|Q28_D32delinsH:1|Q26_D32delinsH:1|P44_S60del:1|L31_S33del:1|L31_I35del:1|G38_P44del:1|G34_S71del:1|D32_S37delinsA:1|D32_S33del:1|D32_I35delinsV:1|A43_P44dup:1	27	60	3:41266134_6|3:41266098_2|3:41266088_2|3:41266133_1|3:41266132_1|3:41266129_1|3:41266127_1|3:41266123_1|3:41266122_1|3:41266113_1|3:41266100_1|3:41266099_1|3:41266097_1|3:41266094_1|3:41266093_1|3:41266086_1|3:41266080_1|3:41266074_1|3:41266073_1|3:41266069_1	liver:636:9|bowel:1782:5|skin:974:4|adrenalgland:291:3|lung:2767:2|prostate:1379:1|breast:2559:1|ovaryfallopiantube:699:1|esophagusstomach:1413:1	24592	pancan	6.53345e-60
	PIK3CA	E:18|K:4|IL:2|KI:1|NR:1	110-114	E110del:17|K111del:4|N114del:1|L113del:1|K111_I112del:1|I112_L113del:1|E110_K111dup:1	26	80	3:178916938_18|3:178916944_5|3:178916954_1|3:178916948_1|3:178916947_1	cnsbrain:2283:7|breast:2559:6|uterus:543:5|bowel:1782:4|softtissue:838:1|prostate:1379:1|lung:2767:1|headandneck:988:1	24592	pancan	2.94618e-59
	FLT3	-:13|E:5|D:2|F:2|K:2|G:1|W:1|Y:1	578-613	F594_D600dup:5|Y599_E604dup:1|Y599_D600insPAPQIMSTSTLISENMNIA:1|Y599_D600insEYEYEYEY:1|Y597_K602dup:1|Y597_E598insDEYFYVDFREY:1|Y597_E598insAGSSDNEYFYVDFREY:1|S585_F594dup:1|S584_F605dup:1|S584_D600dup:1|R595_L601dup:1|R595_E596insDYVDFR:1|N587_D600dup:1|M578_E598dup:1|L601_K602insNVDFREYEYDL:1|F612_G613insQGFYVDFREYEYDLKWEFPRENLEF:1|F594_R595insGTGSSDNEYFYVDF:1|E604_F605insSPRGGNEYFYVDFREYEYDLKW…	27	50	13:28608255_6|13:28608273_2|13:28608262_2|13:28608256_2|13:28608275_1|13:28608268_1|13:28608267_1|13:28608263_1|13:28608261_1|13:28608260_1|13:28608258_1|13:28608251_1|13:28608250_1|13:28608248_1|13:28608244_1|13:28608242_1|13:28608240_1|13:28608219_1|13:28608218_1	blood:890:27	24592	pancan	9.64508e-58
	NOTCH1	FY:17|SF:2|C:1|YC:1	356-359	F357del:17|S356del:2|Y358del:1|C359del:1	21	172	9:139413070_17|9:139413073_2|9:139413067_1|9:139413065_1	cnsbrain:2283:19|headandneck:988:2	24592	pancan	3.46745e-40
	PIK3CA	LE:4|ED:1|EDLLNPIGVT:1|GLEDLLNP:1|GSN:1|HGLED:1|HGLEDLLNPI:1|LEDLLNPIGVTGSNP:1|LLNPIG:1|PHGLEDL:1|T:1|VPHGL:1|VPHGLEDLL:1|WPVPHGLEDL:1	436-466	E453del:4|P449_L456del:1|P449_L452del:1|P447_L455del:1|L455_G460delinsF:1|L452_P458del:1|L452_G460del:1|L436_P449dup:1|H450_L455del:1|G463_N465delinsD:1|G451_D454del:1|E453_T462del:1|E453_P466del:1|E453_D454del:1	17	80	3:178928078_5|3:178928079_2|3:178928065_2|3:178928110_1|3:178928087_1|3:178928075_1|3:178928072_1|3:178928071_1|3:178928069_1|3:178928060_1|3:178928025_1	cnsbrain:2283:7|breast:2559:3|uterus:543:3|bowel:1782:2|esophagusstomach:1413:1|bone:276:1	24592	pancan	4.11313e-35
	CREBBP	SL:16	1680	S1680del:16	16	139	16:3781324_16	lymph:366:7|bladder:955:2|bowel:1782:2|penis:6:1|uterus:543:1|cnsbrain:2283:1|lung:2767:1|esophagusstomach:1413:1	24592	pancan	3.38918e-29
	LATS2	P:13	479-480	P479_A480dup:12|P479_A480insPP:1	13	30	13:21562482_12|13:21562483_1	esophagusstomach:1413:4|lung:2767:2|breast:2559:1|bowel:1782:1|testis:217:1|prostate:1379:1|kidney:1305:1|bladder:955:1|thymus:162:1	24592	pancan	5.22538e-29
	ERBB2	V:8|-:4	778-780	G778_P780dup:12	12	66	17:37881001_8|17:37881002_4	lung:2767:6|breast:2559:6	24592	pancan	7.40771e-24
	NFE2L2	-:1|D:1|DI:1|DILWRQDID:1|EVFDFSQR:1|GV:1|LGVSR:1|REVF:1|REVFDFSQ:1|SR:1|VF:1|WRQDID:1	21-42	W24_D29delinsY:1|S33_R34del:1|R34_S40del:1|R34_F37delinsL:1|L30_S33del:1|I28dup:1|I22_D29del:1|G31del:1|F37del:1|E35_R42del:1|D27del:1|D21_I22delinsE:1	12	31	2:178098960_2|2:178098980_1|2:178098964_1|2:178098959_1|2:178098951_1|2:178098945_1|2:178098943_1|2:178098936_1|2:178098935_1|2:178098924_1|2:178098919_1	lung:2767:8|esophagusstomach:1413:2|liver:636:1|bladder:955:1	24592	pancan	7.43865e-23
	TP53	-:4|NK:4|A:2|R:2|VRA:2|AI:1|AKTCPVQL:1|CQL:1|D:1|DST:1|G:1|GT:1|IY:1|KTCP:1|L:1|LAKTCP:1|P:1|PAL:1|PPG:1|QL:1|QLAKTCP:1|RA:1|SP:1|TCP:1|TP:1|TPPPGTRVR:1|TR:1|TRVR:1|TRVRAMAI:1|VQLWVDSTPPPG:1	128-163	N131del:4|V157_R158del:2|R156del:2|V157_R158dup:1|V147_D148dup:1|V143_P153del:1|T155_R158del:1|T155_R156del:1|T155_A161del:1|T150_R158del:1|R158_A159dup:1|R158_A159del:1|Q136del:1|Q136_C141del:1|P153del:1|P153_G154del:1|P142dup:1|P128del:1|P128_L130del:1|L130del:1|L130_A138dup:1|K139_P142delinsT:1|I162dup:1|I162_Y163delinsN:1|G154_T155del:1|D148del:1|D148_T155dup:1|D148_T150del:1|C141_P142del:1|C…	39	1423	17:7578535_4|17:7578462_3|17:7578540_2|17:7578506_2|17:7578505_2|17:7578456_2|17:7578455_2|17:7578453_2|17:7578443_2|17:7578547_1|17:7578521_1|17:7578520_1|17:7578515_1|17:7578504_1|17:7578495_1|17:7578486_1|17:7578485_1|17:7578480_1|17:7578478_1|17:7578470_1|17:7578469_1|17:7578468_1|17:7578465_1|17:7578454_1|17:7578452_1|17:7578446_1|17:7578444_1	lung:2767:8|cnsbrain:2283:6|breast:2559:6|esophagusstomach:1413:4|ovaryfallopiantube:699:4|uterus:543:2|bowel:1782:2|headandneck:988:2|ampullaofvater:23:1|pancreas:1059:1|softtissue:838:1|prostate:1379:1|liver:636:1	24592	pancan	2.55825e-22
	EGFR	ET:9	709-710	E709_T710delinsD:9	9	224	7:55241679_9	lung:2767:9	24592	pancan	2.46455e-13
	PIK3CA	GNR:3|EPV:1|I:1|IE:1|NR:1|VGN:1	102-108	G106_R108del:3|R108del:1|P104_V105del:1|I102del:1|I102_E103delinsK:1|G106_N107del:1	8	80	3:178916929_3|3:178916934_1|3:178916928_1|3:178916922_1|3:178916918_1|3:178916917_1	breast:2559:3|bowel:1782:3|uterus:543:2	24592	pancan	5.9466e-13
	KIT	S:8	502-503	A502_Y503dup:8	8	84	4:55592178_8	softtissue:838:8	24592	pancan	1.06961e-12
	MAP2K1	LEI:4|IK:1|KPA:1|LIHLEIK:1|PAI:1	99-107	E102_I103del:4|P105_I107delinsL:1|P105_A106del:1|I99_K104del:1|I103_K104del:1	8	17	15:66729094_4|15:66729106_1|15:66729104_1|15:66729099_1|15:66729086_1	skin:974:4|lung:2767:2|blood:890:1|bowel:1782:1	24592	pancan	3.29107e-12
	BRAF	T:3|VK:2|A:1|KSRWS:1|VKSR:1	592-604	T599dup:3|V600_K601delinsE:2|V600_R603del:1|K601_W604del:1|I592_A598dup:1	8	44	7:140453138_3|7:140453134_2|7:140453141_1|7:140453126_1|7:140453122_1	thyroid:618:2|lung:2767:2|bowel:1782:2|skin:974:1|prostate:1379:1	24592	pancan	6.86066e-11
	PIK3R1	LI:2|EL:1|ELINHYRNESLAQYNPK:1|LTFSSV:1|SSVVEL:1|SVVELIN:1|VEL:1|VELINHYRNESL:1|VVELINH:1	397-420	I405del:2|V402_L413del:1|V401_N406del:1|V401_H407del:1|T397_V401del:1|S399_L404del:1|I405_L420del:1|E403_L404delinsV:1|E403_L404del:1	10	293	5:67589223_2|5:67589220_2|5:67589217_1|5:67589216_1|5:67589213_1|5:67589212_1|5:67589207_1|5:67589199_1	cnsbrain:2283:4|uterus:543:4|breast:2559:1|bowel:1782:1	24592	pancan	4.95224e-10
	BRAF	NVTAPT:3|APTPQQ:1|NVTA:1|TAPTP:1|TAPTPQ:1	486-494	N486_P490del:3|T488_Q493delinsK:1|T488_P492del:1|P490_Q494del:1|N486_A489delinsK:1	7	44	7:140477837_3|7:140477842_1|7:140477832_1|7:140477831_1|7:140477827_1	pancreas:1059:3|thyroid:618:2|blood:890:1|prostate:1379:1	24592	pancan	3.95007e-09
	STAT3	EG:6	616	E616del:6	6	22	17:40475061_6	lymph:366:3|lung:2767:1|skin:974:1|esophagusstomach:1413:1	22029	pancan	1.28596e-08
	MTOR	D:2|DALVAYDKKMD:1|WEDAL:1|YEKLHEW:1	1450-1468	Y1450_W1456del:1|W1456_L1460delinsC:1|E1455_E1457dup:1|E1455_D1458dup:1|A1459_D1468del:1	5	25	1:11217304_2|1:11217310_1|1:11217299_1|1:11217275_1	bowel:1782:2|kidney:1305:2|uterus:543:1	24592	pancan	4.14768e-08
	MED12	FNNQPAVS:1|GF:1|KQGFN:1|NVKQGFNNQPAVS:1|QPAVSGDE:1	41-55	V41_S52del:1|P49_E55del:1|N46_S52del:1|K42_N46del:1|G44_F45del:1	5	46	X:70339266_1|X:70339258_1|X:70339253_1|X:70339247_1|X:70339243_1	breast:2559:3|bowel:1782:1|bladder:955:1	24592	pancan	7.95052e-07
	TP53	PHHERC:10|PHHERCS:2|-:1|ERCSD:1|HERCSD:1|HH:1|PHH:1|RCPHH:1|SDSDG:1|V:1|VVRR:1	173-187	P177_C182del:10|H178_S183del:2|V173dup:1|V173_R175del:1|S183_G187delinsC:1|P177_H178del:1|H179del:1|H179_D184del:1|E180_D184del:1|C176dup:1|C176_H179del:1	21	1423	17:7578384_10|17:7578394_2|17:7578382_2|17:7578378_2|17:7578411_1|17:7578406_1|17:7578401_1|17:7578395_1|17:7578371_1	esophagusstomach:1413:4|breast:2559:3|headandneck:988:3|bowel:1782:2|thyroid:618:1|lung:2767:1|cnsbrain:2283:1|softtissue:838:1|prostate:1379:1|ovaryfallopiantube:699:1|skin:974:1|pancreas:1059:1|adrenalgland:291:1	24592	pancan	8.83279e-07
	TP53	PQ:11|EGNLRVE:2|EYLD:1|IRVEGN:1|PQHLIRVEGNLR:1|QH:1|RVEGNLR:1|RVEYL:1|VEGN:1	191-206	P191del:11|G199_E204del:3|V197_N200del:1|R202_L206del:1|Q192del:1|P191_L201del:1|I195_G199del:1|E204_L206del:1	20	1423	17:7578275_11|17:7578238_2|17:7578271_1|17:7578251_1|17:7578249_1|17:7578245_1|17:7578244_1|17:7578231_1|17:7578229_1	cnsbrain:2283:4|esophagusstomach:1413:4|lung:2767:2|prostate:1379:2|softtissue:838:2|ovaryfallopiantube:699:2|bowel:1782:1|pancreas:1059:1|testis:217:1|headandneck:988:1	24592	pancan	3.47237e-06
	SMAD4	DRFCLG:2|FC:1|LGQLSNVHRTEAIE:1|PSGGDRFCLG:1|RFCL:1|RFCLGQLSNVH:1|SGGD:1	357-377	R361_G365del:2|S357_G365del:1|R361_L364del:1|G365_E377del:1|G358_D360del:1|F362_H371del:1|C363del:1	8	134	18:48591917_2|18:48591929_1|18:48591923_1|18:48591920_1|18:48591918_1|18:48591908_1|18:48591905_1	pancreas:1059:3|esophagusstomach:1413:3|bowel:1782:2	24592	pancan	3.68224e-06
	DAXX	EE:4|E:1	457	E457del:4|E457dup:1	5	28	6:33287898_2|6:33287889_2|6:33287888_1	pancreas:1059:3|biliarytract:358:1|lung:2767:1	24592	pancan	8.6108e-06
	AKT2	-:2|I:1|Q:1	60-84	R76_I84dup:1|R67_L78dup:1|L78_Q79insHANTFVIRCL:1|C60_I75dup:1	4	8	19:40761126_1|19:40761117_1|19:40761115_1|19:40761100_1	breast:2559:2|kidney:1305:1|prostate:1379:1	24592	pancan	2.07163e-05
	CDKN2A	VRALLEA:4|LEAGALP:3|ALPN:1|EV:1|GA:1|PNAPN:1|RALLEA:1	27-42	V28_E33del:4|L32_L37del:3|R29_A34del:1|N39_N42del:1|G35_A36del:1|E27del:1|A36_N39delinsD:1	12	219	9:21974727_4|9:21974715_3|9:21974745_1|9:21974725_1|9:21974719_1|9:21974712_1|9:21974702_1	esophagusstomach:1413:3|lung:2767:3|skin:974:2|bladder:955:1|cervix:234:1|pancreas:1059:1|headandneck:988:1	24592	pancan	8.77193e-05
	SRSF2	GRPPDSHHSRRGPPPRRYGGGGYG:1|PPDSHH:1|PPDSHHSRR:1|YGRPPDSH:1|YGRPPDSHH:1	92-117	Y92_H99del:1|Y92_H100del:1|P95_R117del:1|P95_R102del:1|P95_H99del:1	5	20	17:74732946_1|17:74732945_1|17:74732943_1|17:74732936_1|17:74732896_1	lymph:366:2|eye:128:2|blood:890:1	22029	pancan	0.000120847
	NFE2L2	AQLQLDEET:1|EE:1|LDEETGE:1|LQLDEETGEFLPIQ:1	73-87	Q73_T80del:1|L76_E82del:1|L74_Q87del:1|E79del:1	4	31	2:178098809_1|2:178098806_1|2:178098799_1|2:178098784_1	unk:357:1|liver:636:1|breast:2559:1|lung:2767:1	24592	pancan	0.000168585
	SMARCA4	QK:5	546	K546del:5	5	101	19:11106926_5	cnsbrain:2283:4|lymph:366:1	24592	pancan	0.000230673
	PIK3CA	HC:3|HCPL:1	419-422	H419_C420del:3|H419_L422del:1	4	80	3:178927977_4	breast:2559:2|uterus:543:1|prostate:1379:1	24592	pancan	0.000241161
	SMARCB1	EK:5	364	K364del:5	5	37	22:24175857_5	cnsbrain:2283:2|esophagusstomach:1413:2|biliarytract:358:1	24592	pancan	0.000385366
	ANKRD11	KR:4	1461	K1461del:4	4	60	16:89348566_4	softtissue:838:1|bowel:1782:1|skin:974:1|uterus:543:1	22029	pancan	0.000507033
	CEBPA	-:2|E:1|NVE:1	307-311	V308dup:1|T310_Q311insW:1|T310_Q311insKQNP:1|N307_E309delinsK:1	4	26	19:33792395_2|19:33792390_2	blood:890:4	22029	pancan	0.00506139
	U2AF1	G:1|GGG:1|RG:1	222-223	G223dup:1|G223del:1|G222_G223del:1	3	6	21:44513300_1|21:44513282_1|21:44513281_1	bowel:1782:1|headandneck:988:1|bladder:955:1	24592	pancan	0.00657459
	PIK3R1	KL:3|K:1|NK:1	378-380	L380del:3|N378del:1|K379del:1	5	293	5:67589149_3|5:67589147_1|5:67589146_1	cnsbrain:2283:3|breast:2559:2	24592	pancan	0.00935832
	NOTCH1	DD:4	338	D338del:4	4	172	9:139413129_4	cnsbrain:2283:4	24592	pancan	0.011022
	MDC1	K:2|IRAAEKVSR:1	1020-1028	K1025del:2|I1020_R1028del:1	3	29	6:30675170_2|6:30675161_1	esophagusstomach:1413:2|liver:636:1	24592	pancan	0.0133207
	HIST1H1C	K:4	23	K23del:4	4	24	6:26056588_4	bowel:1782:3|breast:2559:1	24592	pancan	0.0155813
	PIK3CA	LWGIHLM:1|LWGIHLMPP:1|WGIH:1	10-18	W11_P18del:1|W11_H14delinsY:1|L10_M16del:1	3	80	3:178916645_1|3:178916643_1|3:178916641_1	bladder:955:1|cnsbrain:2283:1|uterus:543:1	24592	pancan	0.018401
	MYC	PS:3	298	S298del:3	3	13	8:128752729_3	headandneck:988:1|prostate:1379:1|bowel:1782:1	24592	pancan	0.0205825
	SMAD4	L:2|LDE:2|EVLHTMPIA:1	536-546	L536_E538delinsQ:2|V539_A546del:1|L540del:1|D537_E538dup:1	5	134	18:48604785_3|18:48604796_1|18:48604792_1	esophagusstomach:1413:2|biliarytract:358:1|bladder:955:1|bowel:1782:1	24592	pancan	0.024779
	ANKRD11	K:2|EKEKKDGPD:1	1008-1015	K1012del:2|E1008_P1015del:1	3	60	16:89349914_2|16:89349903_1	headandneck:988:1|prostate:1379:1|esophagusstomach:1413:1	22029	pancan	0.0372218
	ESR1	MV:3	422	V422del:3	3	20	6:152382152_3	breast:2559:2|uterus:543:1	24592	pancan	0.0451046
	BAP1	E:2|KGVQVEEIYD:1|VKGVQ:1|Y:1	25-34	E31del:2|Y33del:1|K25_Q28del:1|K25_D34delinsN:1	5	162	3:52443599_2|3:52443609_1|3:52443593_1|3:52443591_1	pleura:76:1|skin:974:1|kidney:1305:1|eye:128:1|cnsbrain:2283:1	24592	pancan	0.0475319
	SOX9	K:3|EKRPFVEEAERLRVQHK:1|KR:1	152-167	K167del:3|R152del:1|R152_K167del:1	5	134	17:70118924_3|17:70118881_1|17:70118877_1	bowel:1782:3|biliarytract:358:1|esophagusstomach:1413:1	24592	pancan	0.0645
	AKT1	-:1|L:1	65-77	T65_I75dup:1|P68_C77dup:1	2	3	14:105243057_1|14:105243050_1	breast:2559:2	24592	pancan	0.0899335
	VHL	IF:4|-:1|NRS:1|VIFC:1	70-80	F76del:4|R79_S80del:1|I75_C77del:1|E70_R79dup:1	7	176	3:10183755_4|3:10183765_1|3:10183753_1|3:10183735_1	kidney:1305:6|pancreas:1059:1	24592	pancan	0.0935986
